# Supplementary material for: Quantitative proteomic characterization and comparison of T helper 17 and induced regulatory T cells
Source: PLoS Biol. 2018 May 31;16(5):e2004194. doi: 10.1371/journal.pbio.2004194 (PMC5979006; doi:10.1371/journal.pbio.2004194)
Supplement: S3 Data — DE, differentially expressed; iTreg, induced regulatory T; Th17, T helper 17. (XLSX) [file pbio.2004194.s008.xlsx]

## Sheet: Fig3a_Th17 vs iTreg
Protein ID	Symbol	Entrez Gene Name	Log FC	Location	Type(s)
P13808	SLC4A2	solute carrier family 4 member 2	5.351	Plasma Membrane	transporter
Q80SY3	ATP6V0D2	ATPase H+ transporting V0 subunit d2	4.623	Cytoplasm	transporter
Q8K0B2	LMBRD1	LMBR1 domain containing 1	4.495	Cytoplasm	transporter
P32037	SLC2A3	solute carrier family 2 member 3	4.215	Plasma Membrane	transporter
Q9D3G5	STX11	syntaxin 11	4.21	Plasma Membrane	transporter
Q8K2P7	SLC38A1	solute carrier family 38 member 1	3.434	Plasma Membrane	transporter
P21995	EMB	embigin	3.087	Plasma Membrane	transporter
O88746	TOM1	target of myb1 membrane trafficking protein	3.007	Cytoplasm	transporter
Q9Z0J0	NPC2	NPC intracellular cholesterol transporter 2	2.807	Extracellular Space	transporter
Q9D173	TOMM7	translocase of outer mitochondrial membrane 7	2.611	Cytoplasm	transporter
Q9CYN9	ATP6AP2	ATPase H+ transporting accessory protein 2	2.572	Cytoplasm	transporter
P06795	Abcb1b	ATP-binding cassette, sub-family B (MDR/TAP), member 1B	2.451	Plasma Membrane	transporter
O88384	VTI1B	vesicle transport through interaction with t-SNAREs 1B	2.334	Plasma Membrane	transporter
Q9R1Q9	ATP6AP1	ATPase H+ transporting accessory protein 1	2.136	Cytoplasm	transporter
Q8CIF6	SIDT2	SID1 transmembrane family member 2	1.967	Cytoplasm	transporter
P61022	CHP1	calcineurin like EF-hand protein 1	1.777	Cytoplasm	transporter
P60060	SEC61G	Sec61 translocon gamma subunit	1.775	Plasma Membrane	transporter
Q6Q477	ATP2B4	ATPase plasma membrane Ca2+ transporting 4	1.388	Plasma Membrane	transporter
Q9DCR2	AP3S1	adaptor related protein complex 3 sigma 1 subunit	1.327	Cytoplasm	transporter
Q9DD02	HIKESHI	Hikeshi, heat shock protein nuclear import factor	1.292	Cytoplasm	transporter
P97370	ATP1B3	ATPase Na+/K+ transporting subunit beta 3	1.273	Plasma Membrane	transporter
P57787	SLC16A3	solute carrier family 16 member 3	1.24	Plasma Membrane	transporter
O09117	SYPL1	synaptophysin like 1	1.158	Plasma Membrane	transporter
G5E829	ATP2B1	ATPase plasma membrane Ca2+ transporting 1	1.149	Plasma Membrane	transporter
Q99LC3	NDUFA10	NADH:ubiquinone oxidoreductase subunit A10	1.108	Cytoplasm	transporter
Q9CQC7	NDUFB4	NADH:ubiquinone oxidoreductase subunit B4	1.099	Cytoplasm	transporter
A2ADY9	DDI2	DNA damage inducible 1 homolog 2	1.049	Plasma Membrane	transporter
P53986	SLC16A1	solute carrier family 16 member 1	0.916	Plasma Membrane	transporter
Q99JR1	SFXN1	sideroflexin 1	0.833	Cytoplasm	transporter
Q9ERN0	SCAMP2	secretory carrier membrane protein 2	0.831	Cytoplasm	transporter
Q62048	PEA15	proliferation and apoptosis adaptor protein 15	0.822	Cytoplasm	transporter
P46460	NSF	N-ethylmaleimide sensitive factor, vesicle fusing ATPase	0.805	Cytoplasm	transporter
P97376	FRG1	FSHD region gene 1	0.797	Nucleus	transporter
P62073	TIMM10	translocase of inner mitochondrial membrane 10	0.746	Cytoplasm	transporter
P57746	ATP6V1D	ATPase H+ transporting V1 subunit D	0.718	Cytoplasm	transporter
Q9DB05	NAPA	NSF attachment protein alpha	0.714	Cytoplasm	transporter
Q9D6M3	SLC25A22	solute carrier family 25 member 22	0.711	Cytoplasm	transporter
Q8VDJ3	HDLBP	high density lipoprotein binding protein	0.702	Nucleus	transporter
Q9WV98	TIMM9	translocase of inner mitochondrial membrane 9	0.655	Cytoplasm	transporter
Q8R4R6	NUP35	nucleoporin 35	0.624	Nucleus	transporter
Q8BY89	SLC44A2	solute carrier family 44 member 2	0.62	Extracellular Space	transporter
F6ZDS4	TPR	translocated promoter region, nuclear basket protein	0.606	Nucleus	transporter
P61971	NUTF2	nuclear transport factor 2	0.604	Nucleus	transporter
P50518	ATP6V1E1	ATPase H+ transporting V1 subunit E1	0.59	Cytoplasm	transporter
Q8VI75	IPO4	importin 4	0.586	Nucleus	transporter
O08997	ATOX1	antioxidant 1 copper chaperone	0.585	Cytoplasm	transporter
O70404	VAMP8	vesicle associated membrane protein 8	0.58	Plasma Membrane	transporter
Q9CQS8	SEC61B	Sec61 translocon beta subunit	0.523	Cytoplasm	transporter
Q9QXX4	SLC25A13	solute carrier family 25 member 13	0.519	Cytoplasm	transporter
Q9D1C8	VPS28	VPS28, ESCRT-I subunit	0.518	Cytoplasm	transporter
Q9CU62	SMC1A	structural maintenance of chromosomes 1A	0.475	Nucleus	transporter
Q9CWK8	SNX2	sorting nexin 2	0.472	Cytoplasm	transporter
Q9CWU9	NUP37	nucleoporin 37	0.436	Nucleus	transporter
O54774	AP3D1	adaptor related protein complex 3 delta 1 subunit	0.431	Cytoplasm	transporter
Q9QZ88	VPS29	VPS29, retromer complex component	0.427	Cytoplasm	transporter
Q9JIH2	NUP50	nucleoporin 50	0.425	Nucleus	transporter
Q99P88	NUP155	nucleoporin 155	0.415	Nucleus	transporter
Q9DCC8	TOMM20	translocase of outer mitochondrial membrane 20	0.397	Cytoplasm	transporter
Q9D8U8	SNX5	sorting nexin 5	0.343	Cytoplasm	transporter
P50516	ATP6V1A	ATPase H+ transporting V1 subunit A	0.336	Plasma Membrane	transporter
O35343	KPNA4	karyopherin subunit alpha 4	0.327	Nucleus	transporter
O35609	SCAMP3	secretory carrier membrane protein 3	0.313	Cytoplasm	transporter
Q99PL5	Rrbp1	ribosome binding protein 1	0.311	Cytoplasm	transporter
P70452	STX4	syntaxin 4	0.306	Plasma Membrane	transporter
Q99LE6	ABCF2	ATP binding cassette subfamily F member 2	0.304	Cytoplasm	transporter
O08784	TCOF1	treacle ribosome biogenesis factor 1	0.275	Nucleus	transporter
Q9EQH3	VPS35	VPS35, retromer complex component	0.254	Cytoplasm	transporter
Q6P8X1	SNX6	sorting nexin 6	0.244	Cytoplasm	transporter
Q8CEC0	NUP88	nucleoporin 88	0.241	Nucleus	transporter
Q8VEK3	HNRNPU	heterogeneous nuclear ribonucleoprotein U	0.194	Nucleus	transporter
O70493	SNX12	sorting nexin 12	0.191	Cytoplasm	transporter
Q8BH59	SLC25A12	solute carrier family 25 member 12	0.159	Cytoplasm	transporter
Q03265	ATP5A1	ATP synthase, H+ transporting, mitochondrial F1 complex, alpha subunit 1, cardiac muscle	-0.181	Cytoplasm	transporter
P62077	TIMM8B	translocase of inner mitochondrial membrane 8 homolog B	-0.208	Cytoplasm	transporter
P48036	ANXA5	annexin A5	-0.223	Plasma Membrane	transporter
Q8CIE6	COPA	coatomer protein complex subunit alpha	-0.229	Cytoplasm	transporter
O55143	ATP2A2	ATPase sarcoplasmic/endoplasmic reticulum Ca2+ transporting 2	-0.252	Cytoplasm	transporter
O35857	TIMM44	translocase of inner mitochondrial membrane 44	-0.255	Cytoplasm	transporter
Q9DCW4	ETFB	electron transfer flavoprotein beta subunit	-0.267	Cytoplasm	transporter
Q9QXK3	COPG2	coatomer protein complex subunit gamma 2	-0.295	Cytoplasm	transporter
Q9DBH5	LMAN2	lectin, mannose binding 2	-0.298	Cytoplasm	transporter
Q8CG47	SMC4	structural maintenance of chromosomes 4	-0.307	Nucleus	transporter
P56480	ATP5B	ATP synthase, H+ transporting, mitochondrial F1 complex, beta polypeptide	-0.311	Cytoplasm	transporter
Q05816	FABP5	fatty acid binding protein 5	-0.316	Cytoplasm	transporter
Q8VEM8	SLC25A3	solute carrier family 25 member 3	-0.329	Cytoplasm	transporter
P51881	SLC25A5	solute carrier family 25 member 5	-0.332	Cytoplasm	transporter
P53811	PITPNB	phosphatidylinositol transfer protein beta	-0.335	Cytoplasm	transporter
Q8BRF7	SCFD1	sec1 family domain containing 1	-0.368	Cytoplasm	transporter
Q9EPL8	IPO7	importin 7	-0.379	Nucleus	transporter
P22892	AP1G1	adaptor related protein complex 1 gamma 1 subunit	-0.388	Cytoplasm	transporter
P52293	KPNA2	karyopherin subunit alpha 2	-0.408	Nucleus	transporter
Q9D2V8	MFSD10	major facilitator superfamily domain containing 10	-0.434	Other	transporter
P58021	TM9SF2	transmembrane 9 superfamily member 2	-0.446	Plasma Membrane	transporter
Q8BH24	TM9SF4	transmembrane 9 superfamily member 4	-0.46	Cytoplasm	transporter
P56382	Atp5e	ATP synthase, H+ transporting, mitochondrial F1 complex, epsilon subunit	-0.463	Cytoplasm	transporter
Q61792	LASP1	LIM and SH3 protein 1	-0.525	Cytoplasm	transporter
Q8JZU2	Slc25a1	solute carrier family 25 (mitochondrial carrier, citrate transporter), member 1	-0.557	Cytoplasm	transporter
P56135	ATP5J2	ATP synthase, H+ transporting, mitochondrial Fo complex subunit F2	-0.563	Cytoplasm	transporter
Q9Z0W3	NUP160	nucleoporin 160	-0.563	Nucleus	transporter
P47802	MTX1	metaxin 1	-0.582	Cytoplasm	transporter
Q99KF1	TMED9	transmembrane p24 trafficking protein 9	-0.589	Cytoplasm	transporter
Q9CQQ7	ATP5F1	ATP synthase, H+ transporting, mitochondrial Fo complex subunit B1	-0.617	Cytoplasm	transporter
Q9WV80	SNX1	sorting nexin 1	-0.644	Cytoplasm	transporter
Q9WTQ8	TIMM23	translocase of inner mitochondrial membrane 23	-0.711	Cytoplasm	transporter
P32020	SCP2	sterol carrier protein 2	-0.74	Cytoplasm	transporter
Q91V61	SFXN3	sideroflexin 3	-0.75	Cytoplasm	transporter
Q9EPE9	ATP13A1	ATPase 13A1	-0.901	Extracellular Space	transporter
Q9CZW5	TOMM70	translocase of outer mitochondrial membrane 70	-0.901	Cytoplasm	transporter
P51912	SLC1A5	solute carrier family 1 member 5	-0.948	Plasma Membrane	transporter
Q8C166	CPNE1	copine 1	-0.965	Nucleus	transporter
O35604	NPC1	NPC intracellular cholesterol transporter 1	-0.969	Cytoplasm	transporter
Q9Z160	COG1	component of oligomeric golgi complex 1	-0.979	Cytoplasm	transporter
P10852	SLC3A2	solute carrier family 3 member 2	-1.013	Plasma Membrane	transporter
O09044	SNAP23	synaptosome associated protein 23	-1.033	Plasma Membrane	transporter
Q921L5	COG2	component of oligomeric golgi complex 2	-1.053	Cytoplasm	transporter
Q62465	VAT1	vesicle amine transport 1	-1.138	Plasma Membrane	transporter
Q9QZD8	SLC25A10	solute carrier family 25 member 10	-1.14	Cytoplasm	transporter
Q9CXK4	SLC50A1	solute carrier family 50 member 1	-1.28	Plasma Membrane	transporter
Q60870	REEP5	receptor accessory protein 5	-1.389	Extracellular Space	transporter
P10417	BCL2	BCL2, apoptosis regulator	-1.569	Cytoplasm	transporter
Q9WVE8	PACSIN2	protein kinase C and casein kinase substrate in neurons 2	-1.579	Cytoplasm	transporter
P22935	CRABP2	cellular retinoic acid binding protein 2	-1.738	Cytoplasm	transporter
Q8R2U0	SEH1L	SEH1 like nucleoporin	-1.793	Cytoplasm	transporter
P36371	TAP2	transporter 2, ATP binding cassette subfamily B member	-1.82	Cytoplasm	transporter
Q9Z127	SLC7A5	solute carrier family 7 member 5	-1.839	Plasma Membrane	transporter
Q8C142	LDLRAP1	low density lipoprotein receptor adaptor protein 1	-1.888	Cytoplasm	transporter
Q8CI04	COG3	component of oligomeric golgi complex 3	-1.925	Cytoplasm	transporter
P21958	TAP1	transporter 1, ATP binding cassette subfamily B member	-1.941	Cytoplasm	transporter
Q8R0H9	GGA1	golgi associated, gamma adaptin ear containing, ARF binding protein 1	-1.964	Cytoplasm	transporter
Q8BTY8	SCFD2	sec1 family domain containing 2	-2.062	Other	transporter
Q9R233	TAPBP	TAP binding protein	-2.178	Cytoplasm	transporter
P14069	S100A6	S100 calcium binding protein A6	-2.253	Cytoplasm	transporter
Q6KAR6	EXOC3	exocyst complex component 3	-2.482	Plasma Membrane	transporter
Q09143	SLC7A1	solute carrier family 7 member 1	-2.615	Plasma Membrane	transporter
Q91VH2	SNX9	sorting nexin 9	-2.636	Cytoplasm	transporter
Q8K4R4	Pitpnc1	phosphatidylinositol transfer protein, cytoplasmic 1	-2.771	Cytoplasm	transporter
Q9EPK6	SIL1	SIL1 nucleotide exchange factor	-2.792	Cytoplasm	transporter
Q61334	BCAP29	B-cell receptor associated protein 29	-2.85	Cytoplasm	transporter
Q61420	SLC35A1	solute carrier family 35 member A1	-2.879	Cytoplasm	transporter
Q9Z0V8	TIMM17A	translocase of inner mitochondrial membrane 17A	-3.037	Cytoplasm	transporter
Q9WVM1	RACGAP1	Rac GTPase activating protein 1	-3.167	Cytoplasm	transporter
P00848	MT-ATP6	ATP synthase F0 subunit 6	-3.454	Cytoplasm	transporter
O35166	GOSR2	golgi SNAP receptor complex member 2	-3.617	Cytoplasm	transporter
E9Q414	APOB	apolipoprotein B	-4.253	Extracellular Space	transporter
Q8VEK0	TMEM30A	transmembrane protein 30A	-4.258	Cytoplasm	transporter
Q8BX94	OSBPL2	oxysterol binding protein like 2	-4.4	Cytoplasm	transporter
P14094	ATP1B1	ATPase Na+/K+ transporting subunit beta 1	-4.61	Plasma Membrane	transporter
Q61790	LAG3	lymphocyte activating 3	6.669	Plasma Membrane	transmembrane receptor
Q60751	IGF1R	insulin like growth factor 1 receptor	6.522	Plasma Membrane	transmembrane receptor
Q9JLZ8	SIGIRR	single Ig and TIR domain containing	6.358	Plasma Membrane	transmembrane receptor
P14438	HLA-DQA1	major histocompatibility complex, class II, DQ alpha 1	6.343	Plasma Membrane	transmembrane receptor
P18337	SELL	selectin L	6.25	Plasma Membrane	transmembrane receptor
P01872	IGHM	immunoglobulin heavy constant mu	6.125	Plasma Membrane	transmembrane receptor
Q9QUM4	SLAMF1	signaling lymphocytic activation molecule family member 1	4.921	Plasma Membrane	transmembrane receptor
P09793	CTLA4	cytotoxic T-lymphocyte associated protein 4	4.809	Plasma Membrane	transmembrane receptor
O70394	IL27RA	interleukin 27 receptor subunit alpha	4.335	Plasma Membrane	transmembrane receptor
Q9ER63	Tnfrsf22/Tnfrsf23	tumor necrosis factor receptor superfamily, member 22	3.951	Plasma Membrane	transmembrane receptor
P31041	CD28	CD28 molecule	2.966	Plasma Membrane	transmembrane receptor
P11942	CD3G	CD3g molecule	2.201	Plasma Membrane	transmembrane receptor
O55242	SIGMAR1	sigma non-opioid intracellular receptor 1	2.081	Plasma Membrane	transmembrane receptor
P13379	CD5	CD5 molecule	1.724	Plasma Membrane	transmembrane receptor
P24161	CD247	CD247 molecule	1.197	Plasma Membrane	transmembrane receptor
P04235	CD3D	CD3d molecule	1.161	Plasma Membrane	transmembrane receptor
P34902	IL2RG	interleukin 2 receptor subunit gamma	1.059	Plasma Membrane	transmembrane receptor
P15702	SPN	sialophorin	1	Plasma Membrane	transmembrane receptor
P08920	CD2	CD2 molecule	0.666	Plasma Membrane	transmembrane receptor
P22646	CD3E	CD3e molecule	0.635	Plasma Membrane	transmembrane receptor
P37217	CD69	CD69 molecule	0.464	Plasma Membrane	transmembrane receptor
P24063	ITGAL	integrin subunit alpha L	0.446	Plasma Membrane	transmembrane receptor
P06332	CD4	CD4 molecule	0.17	Plasma Membrane	transmembrane receptor
P01887	B2M	beta-2-microglobulin	-0.72	Plasma Membrane	transmembrane receptor
Q61735	CD47	CD47 molecule	-0.722	Plasma Membrane	transmembrane receptor
Q61098	IL18R1	interleukin 18 receptor 1	-1.257	Plasma Membrane	transmembrane receptor
Q07113	IGF2R	insulin like growth factor 2 receptor	-1.279	Plasma Membrane	transmembrane receptor
P01590	IL2RA	interleukin 2 receptor subunit alpha	-1.289	Plasma Membrane	transmembrane receptor
P26011	ITGB7	integrin subunit beta 7	-1.395	Plasma Membrane	transmembrane receptor
Q61739	ITGA6	integrin subunit alpha 6	-1.444	Plasma Membrane	transmembrane receptor
O35714	TNFRSF18	TNF receptor superfamily member 18	-2.138	Plasma Membrane	transmembrane receptor
Q00547	HMMR	hyaluronan mediated motility receptor	-3.524	Plasma Membrane	transmembrane receptor
Q60872	EIF1AX	eukaryotic translation initiation factor 1A, X-linked	1.13	Cytoplasm	translation regulator
Q8CJG0	AGO2	argonaute 2, RISC catalytic component	0.597	Cytoplasm	translation regulator
Q6ZWN5	RPS9	ribosomal protein S9	0.578	Cytoplasm	translation regulator
Q8BMJ3	EIF1AY	eukaryotic translation initiation factor 1A, Y-linked	0.576	Other	translation regulator
Q5SW19	CLUH	clustered mitochondria homolog	0.558	Cytoplasm	translation regulator
Q91VK1	BZW2	basic leucine zipper and W2 domains 2	0.534	Cytoplasm	translation regulator
P60335	PCBP1	poly(rC) binding protein 1	0.496	Nucleus	translation regulator
Q8BGD9	EIF4B	eukaryotic translation initiation factor 4B	0.469	Cytoplasm	translation regulator
Q9DBZ5	EIF3K	eukaryotic translation initiation factor 3 subunit K	0.373	Cytoplasm	translation regulator
P58252	EEF2	eukaryotic translation elongation factor 2	0.233	Cytoplasm	translation regulator
Q8BFR5	TUFM	Tu translation elongation factor, mitochondrial	0.216	Cytoplasm	translation regulator
Q9D8N0	EEF1G	eukaryotic translation elongation factor 1 gamma	0.126	Cytoplasm	translation regulator
P57776	EEF1D	eukaryotic translation elongation factor 1 delta	-0.142	Cytoplasm	translation regulator
P10126	EEF1A1	eukaryotic translation elongation factor 1 alpha 1	-0.161	Cytoplasm	translation regulator
P63242	EIF5A	eukaryotic translation initiation factor 5A	-0.236	Cytoplasm	translation regulator
Q6ZWX6	EIF2S1	eukaryotic translation initiation factor 2 subunit alpha	-0.296	Cytoplasm	translation regulator
Q9CZR8	TSFM	Ts translation elongation factor, mitochondrial	-0.31	Cytoplasm	translation regulator
Q8R050	GSPT1	G1 to S phase transition 1	-0.311	Cytoplasm	translation regulator
Q6ZQ58	LARP1	La ribonucleoprotein domain family member 1	-0.436	Cytoplasm	translation regulator
Q8K0D5	GFM1	G elongation factor mitochondrial 1	-0.496	Cytoplasm	translation regulator
Q9QZD9	EIF3I	eukaryotic translation initiation factor 3 subunit I	-0.562	Cytoplasm	translation regulator
P10630	EIF4A2	eukaryotic translation initiation factor 4A2	-0.68	Cytoplasm	translation regulator
Q8VE62	PAIP1	poly(A) binding protein interacting protein 1	-0.958	Cytoplasm	translation regulator
Q9CQT1	MRI1	methylthioribose-1-phosphate isomerase 1	-1.664	Cytoplasm	translation regulator
P60824	CIRBP	cold inducible RNA binding protein	-1.951	Nucleus	translation regulator
Q9EST3	EIF4ENIF1	eukaryotic translation initiation factor 4E nuclear import factor 1	-2.693	Cytoplasm	translation regulator
Q3UGC7	EIF3J	eukaryotic translation initiation factor 3 subunit J	-7.8	Cytoplasm	translation regulator
Q60611	SATB1	SATB homeobox 1	6.015	Nucleus	transcription regulator
P09450	JUNB	JunB proto-oncogene, AP-1 transcription factor subunit	5.928	Nucleus	transcription regulator
P97303	BACH2	BTB domain and CNC homolog 2	5.562	Nucleus	transcription regulator
Q00417	Tcf7	transcription factor 7, T cell specific	5.216	Nucleus	transcription regulator
Q9JJZ6	KLF13	Kruppel like factor 13	4.704	Nucleus	transcription regulator
P48377	RFX1	regulatory factor X1	4.364	Nucleus	transcription regulator
Q8R3B7	BRD8	bromodomain containing 8	3.611	Nucleus	transcription regulator
P97765	WBP2	WW domain binding protein 2	3.492	Cytoplasm	transcription regulator
Q8K1A6	CC2D1A	coiled-coil and C2 domain containing 1A	3.343	Cytoplasm	transcription regulator
O08789	MNT	MAX network transcriptional repressor	3.14	Nucleus	transcription regulator
P18608	HMGN1	high mobility group nucleosome binding domain 1	3.059	Nucleus	transcription regulator
P97360	ETV6	ETS variant 6	3.043	Nucleus	transcription regulator
Q03347	RUNX1	runt related transcription factor 1	2.992	Nucleus	transcription regulator
P56959	Fus	fused in sarcoma	2.945	Nucleus	transcription regulator
P25976	UBTF	upstream binding transcription factor, RNA polymerase I	2.917	Nucleus	transcription regulator
P27661	H2AFX	H2A histone family member X	2.891	Nucleus	transcription regulator
Q61458	CCNH	cyclin H	2.866	Nucleus	transcription regulator
Q9Z0H7	BCL10	B-cell CLL/lymphoma 10	2.778	Cytoplasm	transcription regulator
Q9Z248	AEBP2	AE binding protein 2	2.582	Nucleus	transcription regulator
Q9JKX4	AATF	apoptosis antagonizing transcription factor	2.429	Nucleus	transcription regulator
Q8VDM1	ZGPAT	zinc finger CCCH-type and G-patch domain containing	2.4	Nucleus	transcription regulator
Q9QWV9	CCNT1	cyclin T1	2.304	Nucleus	transcription regulator
Q61466	SMARCD1	SWI/SNF related, matrix associated, actin dependent regulator of chromatin, subfamily d, member 1	2.154	Nucleus	transcription regulator
Q9R0A0	PEX14	peroxisomal biogenesis factor 14	1.856	Cytoplasm	transcription regulator
Q8CB77	ELOA	elongin A	1.742	Nucleus	transcription regulator
Q91YK2	RRP1B	ribosomal RNA processing 1B	1.648	Nucleus	transcription regulator
Q61127	NAB2	NGFI-A binding protein 2	1.457	Nucleus	transcription regulator
Q9Z2D6	MECP2	methyl-CpG binding protein 2	1.334	Nucleus	transcription regulator
Q64287	IRF4	interferon regulatory factor 4	1.274	Nucleus	transcription regulator
Q60953	PML	promyelocytic leukemia	1.106	Nucleus	transcription regulator
Q9ESZ8	GTF2I	general transcription factor IIi	1.016	Nucleus	transcription regulator
Q9R1E0	FOXO1	forkhead box O1	1.014	Nucleus	transcription regulator
P0C7N9	PSMG4	proteasome assembly chaperone 4	1.007	Other	transcription regulator
P63139	NFYB	nuclear transcription factor Y subunit beta	0.956	Nucleus	transcription regulator
Q8VH51	RBM39	RNA binding motif protein 39	0.935	Nucleus	transcription regulator
Q9CWW7	CXXC1	CXXC finger protein 1	0.874	Nucleus	transcription regulator
Q80YV3	TRRAP	transformation/transcription domain associated protein	0.862	Nucleus	transcription regulator
O08900	IKZF3	IKAROS family zinc finger 3	0.812	Nucleus	transcription regulator
Q8R409	HEXIM1	hexamethylene bisacetamide inducible 1	0.785	Nucleus	transcription regulator
Q9D4J7	PHF6	PHD finger protein 6	0.771	Nucleus	transcription regulator
Q7TNV0	DEK	DEK proto-oncogene	0.77	Nucleus	transcription regulator
P11031	SUB1	SUB1 homolog, transcriptional regulator	0.748	Nucleus	transcription regulator
Q9Z0H3	SMARCB1	SWI/SNF related, matrix associated, actin dependent regulator of chromatin, subfamily b, member 1	0.726	Nucleus	transcription regulator
Q9CZY3	UBE2V1	ubiquitin conjugating enzyme E2 V1	0.717	Nucleus	transcription regulator
Q00422	GABPA	GA binding protein transcription factor alpha subunit	0.713	Nucleus	transcription regulator
O54941	SMARCE1	SWI/SNF related, matrix associated, actin dependent regulator of chromatin, subfamily e, member 1	0.704	Nucleus	transcription regulator
Q8VDQ8	SIRT2	sirtuin 2	0.698	Nucleus	transcription regulator
Q8BI72	CDKN2AIP	CDKN2A interacting protein	0.69	Nucleus	transcription regulator
Q9D0D5	GTF2E1	general transcription factor IIE subunit 1	0.689	Nucleus	transcription regulator
Q91VJ5	PQBP1	polyglutamine binding protein 1	0.68	Nucleus	transcription regulator
Q61191	HCFC1	host cell factor C1	0.675	Nucleus	transcription regulator
Q99JF8	PSIP1	PC4 and SFRS1 interacting protein 1	0.666	Nucleus	transcription regulator
Q6PDG5	SMARCC2	SWI/SNF related, matrix associated, actin dependent regulator of chromatin subfamily c member 2	0.653	Nucleus	transcription regulator
Q00899	YY1	YY1 transcription factor	0.647	Nucleus	transcription regulator
Q9JMD0	ZNF207	zinc finger protein 207	0.626	Nucleus	transcription regulator
Q569Z6	THRAP3	thyroid hormone receptor associated protein 3	0.599	Nucleus	transcription regulator
A2BH40	ARID1A	AT-rich interaction domain 1A	0.597	Nucleus	transcription regulator
Q62093	SRSF2	serine and arginine rich splicing factor 2	0.565	Nucleus	transcription regulator
Q99PM3	GTF2A1	general transcription factor IIA subunit 1	0.564	Cytoplasm	transcription regulator
P52633	STAT6	signal transducer and activator of transcription 6	0.563	Nucleus	transcription regulator
Q9D1J3	SARNP	SAP domain containing ribonucleoprotein	0.538	Nucleus	transcription regulator
Q9R190	MTA2	metastasis associated 1 family member 2	0.526	Nucleus	transcription regulator
Q920B9	SUPT16H	SPT16 homolog, facilitates chromatin remodeling subunit	0.526	Nucleus	transcription regulator
P14148	RPL7	ribosomal protein L7	0.514	Nucleus	transcription regulator
Q91WJ8	FUBP1	far upstream element binding protein 1	0.508	Nucleus	transcription regulator
Q9JMG1	EDF1	endothelial differentiation related factor 1	0.499	Nucleus	transcription regulator
Q6PGH1	Bud31	BUD31 homolog	0.493	Nucleus	transcription regulator
Q9D6N5	DRAP1	DR1 associated protein 1	0.486	Nucleus	transcription regulator
P60122	RUVBL1	RuvB like AAA ATPase 1	0.484	Nucleus	transcription regulator
Q64012	RALY	RALY heterogeneous nuclear ribonucleoprotein	0.478	Nucleus	transcription regulator
Q9WTM5	RUVBL2	RuvB like AAA ATPase 2	0.469	Nucleus	transcription regulator
Q60668	HNRNPD	heterogeneous nuclear ribonucleoprotein D	0.468	Nucleus	transcription regulator
Q03267	IKZF1	IKAROS family zinc finger 1	0.46	Nucleus	transcription regulator
Q9WVG6	CARM1	coactivator associated arginine methyltransferase 1	0.443	Nucleus	transcription regulator
Q8C2Q3	RBM14	RNA binding motif protein 14	0.427	Nucleus	transcription regulator
Q99PP7	TRIM33	tripartite motif containing 33	0.419	Nucleus	transcription regulator
Q8CH18	CCAR1	cell division cycle and apoptosis regulator 1	0.417	Nucleus	transcription regulator
Q9CXY6	ILF2	interleukin enhancer binding factor 2	0.394	Nucleus	transcription regulator
Q9QYJ3	DNAJB1	DnaJ heat shock protein family (Hsp40) member B1	0.389	Nucleus	transcription regulator
Q3TKT4	SMARCA4	SWI/SNF related, matrix associated, actin dependent regulator of chromatin, subfamily a, member 4	0.386	Nucleus	transcription regulator
O09106	HDAC1	histone deacetylase 1	0.364	Nucleus	transcription regulator
Q8CHY6	GATAD2A	GATA zinc finger domain containing 2A	0.359	Nucleus	transcription regulator
Q91ZW3	SMARCA5	SWI/SNF related, matrix associated, actin dependent regulator of chromatin, subfamily a, member 5	0.34	Nucleus	transcription regulator
P63158	Gm21596/Hmgb1	high mobility group box 1	0.324	Nucleus	transcription regulator
P27870	VAV1	vav guanine nucleotide exchange factor 1	0.32	Nucleus	transcription regulator
Q08024	CBFB	core-binding factor beta subunit	0.299	Nucleus	transcription regulator
P10711	TCEA1	transcription elongation factor A1	0.27	Nucleus	transcription regulator
Q6A068	CDC5L	cell division cycle 5 like	0.268	Nucleus	transcription regulator
P62960	YBX1	Y-box binding protein 1	0.262	Nucleus	transcription regulator
Q8CGF7	TCERG1	transcription elongation regulator 1	0.261	Nucleus	transcription regulator
P61979	HNRNPK	heterogeneous nuclear ribonucleoprotein K	0.26	Nucleus	transcription regulator
Q62422	OSTF1	osteoclast stimulating factor 1	0.219	Nucleus	transcription regulator
Q7TMY8	HUWE1	HECT, UBA and WWE domain containing 1, E3 ubiquitin protein ligase	0.218	Nucleus	transcription regulator
P83870	PHF5A	PHD finger protein 5A	0.216	Nucleus	transcription regulator
O35129	PHB2	prohibitin 2	0.212	Cytoplasm	transcription regulator
Q9Z1X4	ILF3	interleukin enhancer binding factor 3	0.211	Nucleus	transcription regulator
Q7TPR4	ACTN1	actinin alpha 1	0.204	Cytoplasm	transcription regulator
Q7TPV4	MYBBP1A	MYB binding protein 1a	0.189	Nucleus	transcription regulator
Q60817	NACA	nascent polypeptide-associated complex alpha subunit	0.178	Cytoplasm	transcription regulator
Q9EPB4	PYCARD	PYD and CARD domain containing	-0.199	Cytoplasm	transcription regulator
P61202	Cops2	COP9 signalosome subunit 2	-0.211	Nucleus	transcription regulator
P25799	NFKB1	nuclear factor kappa B subunit 1	-0.227	Nucleus	transcription regulator
P53996	CNBP	CCHC-type zinc finger nucleic acid binding protein	-0.269	Nucleus	transcription regulator
Q99N69	LPXN	leupaxin	-0.293	Cytoplasm	transcription regulator
Q9Z2L7	CRLF3	cytokine receptor like factor 3	-0.296	Cytoplasm	transcription regulator
P68510	YWHAH	tyrosine 3-monooxygenase/tryptophan 5-monooxygenase activation protein eta	-0.336	Cytoplasm	transcription regulator
P42669	PURA	purine rich element binding protein A	-0.384	Nucleus	transcription regulator
P15307	REL	REL proto-oncogene, NF-kB subunit	-0.408	Nucleus	transcription regulator
Q60749	KHDRBS1	KH RNA binding domain containing, signal transduction associated 1	-0.41	Nucleus	transcription regulator
Q80WJ7	MTDH	metadherin	-0.444	Cytoplasm	transcription regulator
Q9CR00	PSMD9	proteasome 26S subunit, non-ATPase 9	-0.489	Cytoplasm	transcription regulator
Q8BHJ5	TBL1XR1	transducin beta like 1 X-linked receptor 1	-0.499	Nucleus	transcription regulator
Q8R3N6	THOC1	THO complex 1	-0.505	Nucleus	transcription regulator
P14211	CALR	calreticulin	-0.535	Cytoplasm	transcription regulator
Q60973	RBBP7	RB binding protein 7, chromatin remodeling factor	-0.569	Nucleus	transcription regulator
O35658	C1QBP	complement C1q binding protein	-0.572	Cytoplasm	transcription regulator
Q8BIH0	SAP130	Sin3A associated protein 130	-0.61	Nucleus	transcription regulator
Q8BWM0	PTGES2	prostaglandin E synthase 2	-0.626	Cytoplasm	transcription regulator
P70671	IRF3	interferon regulatory factor 3	-0.631	Nucleus	transcription regulator
Q9JKB3	YBX3	Y-box binding protein 3	-0.64	Nucleus	transcription regulator
E9Q1P8	IRF2BP2	interferon regulatory factor 2 binding protein 2	-0.676	Nucleus	transcription regulator
O35309	NMI	N-myc and STAT interactor	-0.798	Cytoplasm	transcription regulator
P35601	RFC1	replication factor C subunit 1	-0.81	Nucleus	transcription regulator
P42227	STAT3	signal transducer and activator of transcription 3	-0.824	Nucleus	transcription regulator
Q64337	SQSTM1	sequestosome 1	-0.883	Cytoplasm	transcription regulator
Q61164	CTCF	CCCTC-binding factor	-0.894	Nucleus	transcription regulator
Q8BFV2	PCID2	PCI domain containing 2	-0.91	Nucleus	transcription regulator
Q3UA06	TRIP13	thyroid hormone receptor interactor 13	-0.981	Cytoplasm	transcription regulator
P42128	FOXK1	forkhead box K1	-1.09	Nucleus	transcription regulator
O35473	C1D	C1D nuclear receptor corepressor	-1.234	Nucleus	transcription regulator
P42225	STAT1	signal transducer and activator of transcription 1	-1.473	Nucleus	transcription regulator
P58462	Foxp1	forkhead box P1	-1.656	Nucleus	transcription regulator
Q9D071	MMS19	MMS19 homolog, cytosolic iron-sulfur assembly component	-1.976	Nucleus	transcription regulator
O08792	EBF2	early B-cell factor 2	-2.005	Nucleus	transcription regulator
Q924H2	MED15	mediator complex subunit 15	-2.211	Nucleus	transcription regulator
Q3TNH5	FAM172A	family with sequence similarity 172 member A	-2.214	Cytoplasm	transcription regulator
Q9WVL2	STAT2	signal transducer and activator of transcription 2	-2.216	Nucleus	transcription regulator
Q91XV3	BASP1	brain abundant membrane attached signal protein 1	-2.522	Nucleus	transcription regulator
Q921G6	LRCH4	leucine rich repeats and calponin homology domain containing 4	-2.542	Cytoplasm	transcription regulator
O88291	ZNF326	zinc finger protein 326	-2.63	Nucleus	transcription regulator
Q9ERG2	STRN3	striatin 3	-2.887	Nucleus	transcription regulator
Q9CS74	ECD	ecdysoneless cell cycle regulator	-2.904	Nucleus	transcription regulator
Q02614	SAP30BP	SAP30 binding protein	-2.98	Nucleus	transcription regulator
P70403	Cux1	cut-like homeobox 1	-2.995	Nucleus	transcription regulator
Q99KN2	CIAO1	cytosolic iron-sulfur assembly component 1	-3.235	Nucleus	transcription regulator
Q64131	RUNX3	runt related transcription factor 3	-3.37	Nucleus	transcription regulator
P28574	MAX	MYC associated factor X	-3.478	Nucleus	transcription regulator
Q9Z1E3	NFKBIA	NFKB inhibitor alpha	-4.125	Cytoplasm	transcription regulator
Q9CYZ8	SSBP2	single stranded DNA binding protein 2	-4.349	Nucleus	transcription regulator
Q9CX60	LBH	limb bud and heart development	-4.66	Nucleus	transcription regulator
Q8C208	IKZF4	IKAROS family zinc finger 4	-6.027	Nucleus	transcription regulator
Q99JB6	FOXP3	forkhead box P3	-7.656	Nucleus	transcription regulator
Q8CE08	ACPP	acid phosphatase, prostate	6.354	Extracellular Space	phosphatase
O70250	PGAM2	phosphoglycerate mutase 2	4.486	Cytoplasm	phosphatase
Q6P549	INPPL1	inositol polyphosphate phosphatase like 1	4.136	Cytoplasm	phosphatase
Q6NVE9	PPTC7	PTC7 protein phosphatase homolog	2.996	Cytoplasm	phosphatase
Q3UV70	PDP1	pyruvate dehyrogenase phosphatase catalytic subunit 1	2.902	Cytoplasm	phosphatase
Q9Z2L6	MINPP1	multiple inositol-polyphosphate phosphatase 1	1.773	Cytoplasm	phosphatase
Q8BGR9	UBLCP1	ubiquitin like domain containing CTD phosphatase 1	1.2	Nucleus	phosphatase
Q7TSG2	CTDP1	CTD phosphatase subunit 1	0.675	Nucleus	phosphatase
P63087	Ppp1cc	protein phosphatase 1, catalytic subunit, gamma isoform	0.583	Cytoplasm	phosphatase
P06800	PTPRC	protein tyrosine phosphatase, receptor type C	0.487	Plasma Membrane	phosphatase
Q9EQU5	SET	SET nuclear proto-oncogene	0.404	Nucleus	phosphatase
Q9D967	MDP1	magnesium dependent phosphatase 1	0.314	Cytoplasm	phosphatase
P62137	PPP1CA	protein phosphatase 1 catalytic subunit alpha	0.304	Cytoplasm	phosphatase
Q3UM45	PPP1R7	protein phosphatase 1 regulatory subunit 7	-0.287	Nucleus	phosphatase
P35821	PTPN1	protein tyrosine phosphatase, non-receptor type 1	-0.446	Cytoplasm	phosphatase
Q9D358	ACP1	acid phosphatase 1	-0.455	Cytoplasm	phosphatase
P29351	PTPN6	protein tyrosine phosphatase, non-receptor type 6	-0.456	Cytoplasm	phosphatase
Q61152	PTPN18	protein tyrosine phosphatase, non-receptor type 18	-0.478	Nucleus	phosphatase
Q9CQR6	PPP6C	protein phosphatase 6 catalytic subunit	-0.615	Nucleus	phosphatase
Q8BUM3	PTPN7	protein tyrosine phosphatase, non-receptor type 7	-0.629	Cytoplasm	phosphatase
Q7TNP2	PPP2R1B	protein phosphatase 2 scaffold subunit Abeta	-0.705	Plasma Membrane	phosphatase
P58389	PTPA	protein phosphatase 2 phosphatase activator	-0.748	Cytoplasm	phosphatase
Q9D880	TIMM50	translocase of inner mitochondrial membrane 50	-0.774	Cytoplasm	phosphatase
Q6P1F6	PPP2R2A	protein phosphatase 2 regulatory subunit Balpha	-0.775	Cytoplasm	phosphatase
Q9ES52	INPP5D	inositol polyphosphate-5-phosphatase D	-0.859	Cytoplasm	phosphatase
P36993	PPM1B	protein phosphatase, Mg2+/Mn2+ dependent 1B	-0.884	Cytoplasm	phosphatase
P48453	PPP3CB	protein phosphatase 3 catalytic subunit beta	-0.894	Plasma Membrane	phosphatase
Q3V1L4	NT5C2	5'-nucleotidase, cytosolic II	-0.941	Cytoplasm	phosphatase
Q9D020	NT5C3A	5'-nucleotidase, cytosolic IIIA	-0.946	Cytoplasm	phosphatase
Q99LS3	PSPH	phosphoserine phosphatase	-1.088	Cytoplasm	phosphatase
Q9EP69	SACM1L	SAC1 like phosphatidylinositide phosphatase	-1.145	Cytoplasm	phosphatase
Q6ZPE2	SBF1	SET binding factor 1	-1.537	Plasma Membrane	phosphatase
Q6P1Y8	INPP4B	inositol polyphosphate-4-phosphatase type II B	-2.056	Cytoplasm	phosphatase
Q91UZ5	IMPA2	inositol monophosphatase 2	-2.16	Cytoplasm	phosphatase
Q925E7	PPP2R2D	protein phosphatase 2 regulatory subunit Bdelta	-3.251	Nucleus	phosphatase
Q61503	NT5E	5'-nucleotidase ecto	-4.568	Plasma Membrane	phosphatase
Q8K4R9	DLGAP5	DLG associated protein 5	-5.054	Nucleus	phosphatase
O35239	PTPN9	protein tyrosine phosphatase, non-receptor type 9	-5.309	Cytoplasm	phosphatase
P70269	CTSE	cathepsin E	8.502	Cytoplasm	peptidase
P06797	CTSV	cathepsin V	4.826	Cytoplasm	peptidase
O55234	PSMB5	proteasome subunit beta 5	4.538	Cytoplasm	peptidase
Q2TBA3	MALT1	MALT1 paracaspase	3.081	Cytoplasm	peptidase
O89001	CPD	carboxypeptidase D	2.969	Extracellular Space	peptidase
O89017	LGMN	legumain	2.525	Cytoplasm	peptidase
Q9ET22	DPP7	dipeptidyl peptidase 7	2.328	Cytoplasm	peptidase
Q99LG0	USP16	ubiquitin specific peptidase 16	1.667	Cytoplasm	peptidase
O08738	CASP6	caspase 6	1.57	Cytoplasm	peptidase
Q8C129	LNPEP	leucyl and cystinyl aminopeptidase	1.5	Cytoplasm	peptidase
Q9CPY7	LAP3	leucine aminopeptidase 3	1.391	Cytoplasm	peptidase
Q921W0	CHMP1A	charged multivesicular body protein 1A	1.297	Extracellular Space	peptidase
Q8JZQ2	AFG3L2	AFG3 like matrix AAA peptidase subunit 2	1.261	Cytoplasm	peptidase
Q920A5	SCPEP1	serine carboxypeptidase 1	1.215	Cytoplasm	peptidase
P16675	CTSA	cathepsin A	1.048	Cytoplasm	peptidase
Q6NSR8	NPEPL1	aminopeptidase like 1	0.982	Nucleus	peptidase
O89023	TPP1	tripeptidyl peptidase 1	0.892	Cytoplasm	peptidase
P61290	PSME3	proteasome activator subunit 3	0.779	Cytoplasm	peptidase
Q8C1A5	THOP1	thimet oligopeptidase 1	0.777	Cytoplasm	peptidase
Q60692	PSMB6	proteasome subunit beta 6	0.68	Nucleus	peptidase
Q11136	PEPD	peptidase D	0.676	Cytoplasm	peptidase
P57716	NCSTN	nicastrin	0.661	Plasma Membrane	peptidase
Q6A4J8	USP7	ubiquitin specific peptidase 7	0.6	Nucleus	peptidase
P97864	CASP7	caspase 7	0.58	Cytoplasm	peptidase
O88696	CLPP	caseinolytic mitochondrial matrix peptidase proteolytic subunit	0.452	Cytoplasm	peptidase
Q3TIX9	USP39	ubiquitin specific peptidase 39	0.442	Nucleus	peptidase
Q9JHR7	IDE	insulin degrading enzyme	0.396	Extracellular Space	peptidase
Q99KK7	DPP3	dipeptidyl peptidase 3	0.175	Cytoplasm	peptidase
Q9QUM9	PSMA6	proteasome subunit alpha 6	-0.184	Cytoplasm	peptidase
Q9R1P0	PSMA4	proteasome subunit alpha 4	-0.187	Cytoplasm	peptidase
P27773	PDIA3	protein disulfide isomerase family A member 3	-0.19	Cytoplasm	peptidase
P18242	CTSD	cathepsin D	-0.226	Cytoplasm	peptidase
Q9R1P4	PSMA1	proteasome subunit alpha 1	-0.25	Cytoplasm	peptidase
Q8K0D2	HABP2	hyaluronan binding protein 2	-0.259	Extracellular Space	peptidase
O88544	COPS4	COP9 signalosome subunit 4	-0.273	Cytoplasm	peptidase
Q9R1P1	PSMB3	proteasome subunit beta 3	-0.278	Cytoplasm	peptidase
O35593	PSMD14	proteasome 26S subunit, non-ATPase 14	-0.282	Cytoplasm	peptidase
Q9JHU4	DYNC1H1	dynein cytoplasmic 1 heavy chain 1	-0.283	Cytoplasm	peptidase
Q9Z2U1	PSMA5	proteasome subunit alpha 5	-0.324	Cytoplasm	peptidase
P49722	PSMA2	proteasome subunit alpha 2	-0.359	Cytoplasm	peptidase
P99026	PSMB4	proteasome subunit beta 4	-0.365	Cytoplasm	peptidase
Q8R146	APEH	acylaminoacyl-peptide hydrolase	-0.38	Cytoplasm	peptidase
Q99M31	HSPA14	heat shock protein family A (Hsp70) member 14	-0.388	Cytoplasm	peptidase
P54775	PSMC4	proteasome 26S subunit, ATPase 4	-0.398	Nucleus	peptidase
Q8VCM8	NCLN	nicalin	-0.424	Cytoplasm	peptidase
Q9JMA1	USP14	ubiquitin specific peptidase 14	-0.456	Cytoplasm	peptidase
P56399	USP5	ubiquitin specific peptidase 5	-0.514	Cytoplasm	peptidase
P51125	CAST	calpastatin	-0.525	Cytoplasm	peptidase
B1AY13	USP24	ubiquitin specific peptidase 24	-0.565	Nucleus	peptidase
Q8K411	PITRM1	pitrilysin metallopeptidase 1	-0.582	Cytoplasm	peptidase
Q64514	TPP2	tripeptidyl peptidase 2	-0.584	Cytoplasm	peptidase
Q9Z2W0	DNPEP	aspartyl aminopeptidase	-0.604	Cytoplasm	peptidase
Q9D8V0	HM13	histocompatibility minor 13	-0.609	Cytoplasm	peptidase
O89110	CASP8	caspase 8	-0.646	Nucleus	peptidase
Q9EP89	LACTB	lactamase beta	-0.649	Cytoplasm	peptidase
Q8BP48	METAP1	methionyl aminopeptidase 1	-0.725	Cytoplasm	peptidase
Q9EQH2	ERAP1	endoplasmic reticulum aminopeptidase 1	-0.736	Extracellular Space	peptidase
Q9CXT8	PMPCB	peptidase, mitochondrial processing beta subunit	-0.757	Cytoplasm	peptidase
Q62426	CSTB	cystatin B	-0.758	Cytoplasm	peptidase
P28063	PSMB8	proteasome subunit beta 8	-0.782	Cytoplasm	peptidase
P35123	USP4	ubiquitin specific peptidase 4	-0.83	Nucleus	peptidase
P70677	CASP3	caspase 3	-0.842	Cytoplasm	peptidase
Q8CGK3	LONP1	lon peptidase 1, mitochondrial	-0.847	Cytoplasm	peptidase
Q9D1A2	CNDP2	carnosine dipeptidase 2	-0.915	Cytoplasm	peptidase
P97372	PSME2	proteasome activator subunit 2	-1.141	Cytoplasm	peptidase
O08529	CAPN2	calpain 2	-1.219	Cytoplasm	peptidase
Q9DC61	PMPCA	peptidase, mitochondrial processing alpha subunit	-1.384	Cytoplasm	peptidase
Q9JIY5	HTRA2	HtrA serine peptidase 2	-1.442	Cytoplasm	peptidase
P28076	PSMB9	proteasome subunit beta 9	-1.496	Cytoplasm	peptidase
O35955	PSMB10	proteasome subunit beta 10	-1.674	Cytoplasm	peptidase
Q8VCT3	RNPEP	arginyl aminopeptidase	-2.169	Cytoplasm	peptidase
Q3UCV8	OTULIN	OTU deubiquitinase with linear linkage specificity	-2.565	Cytoplasm	peptidase
O35598	ADAM10	ADAM metallopeptidase domain 10	-3.728	Plasma Membrane	peptidase
P56203	CTSW	cathepsin W	-4.266	Cytoplasm	peptidase
P29452	CASP1	caspase 1	-4.964	Cytoplasm	peptidase
P08882	Gzmc	granzyme C	-8.542	Cytoplasm	peptidase
P04187	Gzmb	granzyme B	-10.252	Cytoplasm	peptidase
Q9D154	SERPINB1	serpin family B member 1	8.697	Cytoplasm	other
P14483	HLA-DQB1	major histocompatibility complex, class II, DQ beta 1	8.538	Plasma Membrane	other
Q9Z1P7	KANK3	KN motif and ankyrin repeat domains 3	6.584	Cytoplasm	other
P13609	Srgn	serglycin	6.507	Cytoplasm	other
Q9D6S7	MRRF	mitochondrial ribosome recycling factor	6.334	Cytoplasm	other
Q61500	ITM2A	integral membrane protein 2A	6.036	Plasma Membrane	other
Q61545	Ewsr1	Ewing sarcoma breakpoint region 1	5.703	Nucleus	other
Q9CZ62	CEP97	centrosomal protein 97	5.625	Cytoplasm	other
Q9JI48	PLAC8	placenta specific 8	5.366	Nucleus	other
Q9D773	MRPL2	mitochondrial ribosomal protein L2	5.333	Extracellular Space	other
P35330	ICAM2	intercellular adhesion molecule 2	5.322	Plasma Membrane	other
Q99K51	PLS3	plastin 3	5.116	Cytoplasm	other
Q8CI32	BAG5	BCL2 associated athanogene 5	5.093	Cytoplasm	other
Q8R0F5	RBMX2	RNA binding motif protein, X-linked 2	5.066	Other	other
Q91X84	CRTC3	CREB regulated transcription coactivator 3	4.871	Nucleus	other
Q5XG71	UTP20	UTP20, small subunit processome component	4.799	Nucleus	other
Q8BGD8	Coa6	cytochrome c oxidase assembly factor 6	4.609	Cytoplasm	other
P47879	IGFBP4	insulin like growth factor binding protein 4	4.553	Extracellular Space	other
O89032	SH3PXD2A	SH3 and PX domains 2A	4.509	Cytoplasm	other
Q3UDK1	TRAFD1	TRAF-type zinc finger domain containing 1	4.486	Other	other
Q69Z23	DNAH17	dynein axonemal heavy chain 17	4.463	Cytoplasm	other
Q78T54	Vma21	VMA21 vacuolar H+-ATPase homolog (S. cerevisiae)	4.381	Cytoplasm	other
O54901	CD200	CD200 molecule	4.27	Plasma Membrane	other
Q6ZWR6	SYNE1	spectrin repeat containing nuclear envelope protein 1	4.257	Nucleus	other
Q8R0X2	CACUL1	CDK2 associated cullin domain 1	4.169	Other	other
Q80SZ7	GNG5	G protein subunit gamma 5	4.02	Plasma Membrane	other
P01837	IGKC	immunoglobulin kappa constant	3.954	Extracellular Space	other
P48193	EPB41	erythrocyte membrane protein band 4.1	3.907	Plasma Membrane	other
A2AWA9	RABGAP1	RAB GTPase activating protein 1	3.904	Cytoplasm	other
Q91YU8	PPAN	peter pan homolog (Drosophila)	3.901	Nucleus	other
O70401	TSPAN6	tetraspanin 6	3.881	Plasma Membrane	other
Q8BG60	TXNIP	thioredoxin interacting protein	3.764	Cytoplasm	other
Q8R143	PTTG1IP	PTTG1 interacting protein	3.664	Nucleus	other
P28667	MARCKSL1	MARCKS like 1	3.655	Cytoplasm	other
P35441	THBS1	thrombospondin 1	3.636	Extracellular Space	other
Q9D0I8	MRTO4	MRT4 homolog, ribosome maturation factor	3.616	Cytoplasm	other
Q9CS00	CACTIN	cactin, spliceosome C complex subunit	3.587	Nucleus	other
Q9CQX5	CLDND1	claudin domain containing 1	3.582	Plasma Membrane	other
Q8BZ05	ARAP2	ArfGAP with RhoGAP domain, ankyrin repeat and PH domain 2	3.489	Cytoplasm	other
Q8BX70	VPS13C	vacuolar protein sorting 13 homolog C	3.464	Cytoplasm	other
Q8BTT6	DIEXF	digestive organ expansion factor homolog (zebrafish)	3.437	Nucleus	other
Q9CQ74	LEPROTL1	leptin receptor overlapping transcript like 1	3.43	Plasma Membrane	other
Q6PEM6	GRAMD2B	GRAM domain containing 2B	3.375	Extracellular Space	other
Q9D1X9	TMEM50B	transmembrane protein 50B	3.309	Plasma Membrane	other
Q5DTN8	JAKMIP3	Janus kinase and microtubule interacting protein 3	3.296	Other	other
Q8QZY6	TSPAN14	tetraspanin 14	3.26	Plasma Membrane	other
P11260			3.258	other	other
P21460	CST3	cystatin C	3.255	Extracellular Space	other
Q9D0R9	WDR89	WD repeat domain 89	3.233	Other	other
P70124	SERPINB5	serpin family B member 5	3.197	Extracellular Space	other
Q80TE0	RPAP1	RNA polymerase II associated protein 1	3.149	Other	other
Q8R1S4	MTSS1	MTSS1, I-BAR domain containing	3.146	Cytoplasm	other
Q9JLJ1	SELENOK	selenoprotein K	3.127	Cytoplasm	other
Q9QXL1	KIF21B	kinesin family member 21B	3.105	Cytoplasm	other
Q9CZG3	COMMD8	COMM domain containing 8	3.027	Other	other
Q8VI84	NOC3L	NOC3 like DNA replication regulator	3.011	Nucleus	other
Q3UFS4	GPATCH11	G-patch domain containing 11	2.949	Nucleus	other
Q8CHT6	Fam169b	family with sequence similarity 169, member B	2.91	Other	other
Q9CQJ1	HIGD2A	HIG1 hypoxia inducible domain family member 2A	2.876	Cytoplasm	other
P09926	SURF2	surfeit 2	2.833	Nucleus	other
Q3THJ3	EIF1AD	eukaryotic translation initiation factor 1A domain containing	2.831	Nucleus	other
P58802	TBC1D10A	TBC1 domain family member 10A	2.806	Plasma Membrane	other
Q18PI6	CD84	CD84 molecule	2.801	Plasma Membrane	other
G3XA57	RAB11FIP2	RAB11 family interacting protein 2	2.8	Cytoplasm	other
P21956	MFGE8	milk fat globule-EGF factor 8 protein	2.769	Extracellular Space	other
Q9R0L7	AKAP8L	A-kinase anchoring protein 8 like	2.752	Nucleus	other
Q9CYX7	RRP15	ribosomal RNA processing 15 homolog	2.633	Nucleus	other
Q8R2M2	DNTTIP2	deoxynucleotidyltransferase terminal interacting protein 2	2.62	Nucleus	other
A2AUM9	CEP152	centrosomal protein 152	2.615	Cytoplasm	other
Q8K0V4	CNOT3	CCR4-NOT transcription complex subunit 3	2.558	Cytoplasm	other
Q6ZQE4	NEMP1	nuclear envelope integral membrane protein 1	2.556	Nucleus	other
Q8BM55	TMEM214	transmembrane protein 214	2.545	Extracellular Space	other
Q8C5W3	TBCEL	tubulin folding cofactor E like	2.524	Other	other
O35242	NSMAF	neutral sphingomyelinase activation associated factor	2.497	Cytoplasm	other
Q5I012	SLC38A10	solute carrier family 38 member 10	2.497	Cytoplasm	other
Q9JJT9	PHAX	phosphorylated adaptor for RNA export	2.494	Cytoplasm	other
P31725	S100A9	S100 calcium binding protein A9	2.471	Cytoplasm	other
P17665	Cox7c	cytochrome c oxidase subunit VIIc	2.466	Cytoplasm	other
P54116	STOM	stomatin	2.436	Plasma Membrane	other
Q3U308	CTU2	cytosolic thiouridylase subunit 2	2.434	Cytoplasm	other
O88890	SH2D1A	SH2 domain containing 1A	2.371	Cytoplasm	other
Q9D7Z3	NOL7	nucleolar protein 7	2.355	Nucleus	other
Q5M8N4	SDR39U1	short chain dehydrogenase/reductase family 39U member 1	2.351	Nucleus	other
P30355	ALOX5AP	arachidonate 5-lipoxygenase activating protein	2.348	Plasma Membrane	other
Q9D937	C11orf98	chromosome 11 open reading frame 98	2.274	Other	other
Q6A0D4	RFTN1	raftlin, lipid raft linker 1	2.274	Plasma Membrane	other
P09602	Hmgn2 (includes others)	high mobility group nucleosomal binding domain 2	2.266	Nucleus	other
P97300	Nptn	neuroplastin	2.253	Plasma Membrane	other
Q3UL36	ARGLU1	arginine and glutamate rich 1	2.236	Other	other
P11438	LAMP1	lysosomal associated membrane protein 1	2.236	Plasma Membrane	other
E9Q6J5	BOD1L1	biorientation of chromosomes in cell division 1 like 1	2.23	Nucleus	other
P62700	YPEL5	yippee like 5	2.221	Nucleus	other
Q80U16	RIPOR2	RHO family interacting cell polarization regulator 2	2.167	Cytoplasm	other
Q91VV4	DENND2D	DENN domain containing 2D	2.124	Cytoplasm	other
P70429	EVL	Enah/Vasp-like	2.104	Plasma Membrane	other
Q9CVI2	FAM133B	family with sequence similarity 133 member B	2.095	Other	other
A8E0Y8	CD101	CD101 molecule	2.087	Plasma Membrane	other
Q3TQI7	C9orf78	chromosome 9 open reading frame 78	1.985	Other	other
Q8R0J7	VPS37B	VPS37B, ESCRT-I subunit	1.973	Cytoplasm	other
Q5U5Q9	UIMC1	ubiquitin interaction motif containing 1	1.956	Nucleus	other
Q9D8T0	FAM3A	family with sequence similarity 3 member A	1.937	Extracellular Space	other
Q3TCX3	KHDC4	KH domain containing 4, pre-mRNA splicing factor	1.904	Nucleus	other
Q8BYZ1	ABI3	ABI family member 3	1.879	Plasma Membrane	other
Q99LL5	PWP1	PWP1 homolog, endonuclein	1.876	Nucleus	other
Q9DB70	FUNDC1	FUN14 domain containing 1	1.795	Cytoplasm	other
Q8C3R1	BRAT1	BRCA1 associated ATM activator 1	1.766	Nucleus	other
Q8R3N1	NOP14	NOP14 nucleolar protein	1.761	Nucleus	other
Q6P5B0	RRP12	ribosomal RNA processing 12 homolog	1.752	Nucleus	other
Q9CPW7	ZMAT2	zinc finger matrin-type 2	1.737	Nucleus	other
Q01965	LY9	lymphocyte antigen 9	1.713	Plasma Membrane	other
Q9D0M5	DYNLL2	dynein light chain LC8-type 2	1.708	Cytoplasm	other
Q9WVM3	ANAPC7	anaphase promoting complex subunit 7	1.69	Nucleus	other
Q69ZQ2	ISY1-RAB43	ISY1-RAB43 readthrough	1.69	Nucleus	other
Q8BIY3	ZC3H12D	zinc finger CCCH-type containing 12D	1.687	Cytoplasm	other
Q6PGL7	WASHC2A/WASHC2C	WASH complex subunit 2A	1.632	Cytoplasm	other
Q9DCK4	ZNF414	zinc finger protein 414	1.631	Other	other
Q9CQE5	RGS10	regulator of G protein signaling 10	1.615	Cytoplasm	other
Q9ER73	ELP4	elongator acetyltransferase complex subunit 4	1.608	Cytoplasm	other
O08917	FLOT1	flotillin 1	1.573	Plasma Membrane	other
Q8BG81	POLDIP3	DNA polymerase delta interacting protein 3	1.571	Nucleus	other
P36916	GNL1	G protein nucleolar 1 (putative)	1.533	Nucleus	other
Q8BZX4	SREK1	splicing regulatory glutamic acid and lysine rich protein 1	1.52	Nucleus	other
Q8BHY2	NOC4L	nucleolar complex associated 4 homolog	1.476	Nucleus	other
Q9CPR8	NSMCE3	NSE3 homolog, SMC5-SMC6 complex component	1.463	Nucleus	other
O35071	KIF1C	kinesin family member 1C	1.443	Cytoplasm	other
P05533	Ly6a (includes others)	lymphocyte antigen 6 complex, locus A	1.438	Plasma Membrane	other
Q80WW9	DDRGK1	DDRGK domain containing 1	1.431	Extracellular Space	other
Q8K3H0	APPL1	adaptor protein, phosphotyrosine interacting with PH domain and leucine zipper 1	1.409	Cytoplasm	other
Q9D8B3	CHMP4B	charged multivesicular body protein 4B	1.38	Cytoplasm	other
Q99LY9	Ndufs5	NADH dehydrogenase (ubiquinone) Fe-S protein 5	1.375	Cytoplasm	other
Q8BWF2	GIMAP1-GIMAP5	GIMAP1-GIMAP5 readthrough	1.318	Cytoplasm	other
P01852			1.313	other	other
Q9Z0F4	CIB1	calcium and integrin binding 1	1.313	Nucleus	other
Q9QXY6	EHD3	EH domain containing 3	1.311	Cytoplasm	other
Q9CQX8	MRPS36	mitochondrial ribosomal protein S36	1.301	Cytoplasm	other
Q8VE92	RBM4B	RNA binding motif protein 4B	1.29	Nucleus	other
Q61584	FXR1	FMR1 autosomal homolog 1	1.283	Cytoplasm	other
Q6P1E1	ZMIZ1	zinc finger MIZ-type containing 1	1.283	Nucleus	other
Q80YR5	SAFB2	scaffold attachment factor B2	1.26	Cytoplasm	other
Q5SFM8	RBM27	RNA binding motif protein 27	1.256	Nucleus	other
Q9EQ61	PES1	pescadillo ribosomal biogenesis factor 1	1.242	Nucleus	other
Q8K3X4	IRF2BPL	interferon regulatory factor 2 binding protein like	1.23	Nucleus	other
Q91WE2	FAM192A	family with sequence similarity 192 member A	1.228	Nucleus	other
P0DN34			1.224	other	other
Q8R1N4	NUDCD3	NudC domain containing 3	1.224	Cytoplasm	other
Q8JZM7	CDC73	cell division cycle 73	1.222	Nucleus	other
O88952	LIN7C	lin-7 homolog C, crumbs cell polarity complex component	1.21	Cytoplasm	other
Q9CYL5	GLIPR2	GLI pathogenesis related 2	1.183	Cytoplasm	other
Q4FK66	PRPF38A	pre-mRNA processing factor 38A	1.176	Nucleus	other
O35075	DSCR3	DSCR3 arrestin fold containing	1.156	Nucleus	other
Q8WUR0	C19orf12	chromosome 19 open reading frame 12	1.147	Cytoplasm	other
Q99KD5	UNC45A	unc-45 myosin chaperone A	1.143	Plasma Membrane	other
Q8WTY4	CIAPIN1	cytokine induced apoptosis inhibitor 1	1.141	Cytoplasm	other
Q8CHG7	RAPGEF2	Rap guanine nucleotide exchange factor 2	1.123	Cytoplasm	other
P28740	KIF2A	kinesin family member 2A	1.108	Cytoplasm	other
Q9D0J8	Ptms	parathymosin	1.073	Cytoplasm	other
B1AXP6	Tomm5	translocase of outer mitochondrial membrane 5 homolog (yeast)	1.065	Cytoplasm	other
Q640N3	ARHGAP30	Rho GTPase activating protein 30	1.061	Cytoplasm	other
Q3TGF2	FAM107B	family with sequence similarity 107 member B	1.046	Other	other
Q6NZF1	ZC3H11A	zinc finger CCCH-type containing 11A	1.042	Nucleus	other
Q9JHQ5	LZTFL1	leucine zipper transcription factor like 1	1.039	Cytoplasm	other
Q149G0	C2orf68	chromosome 2 open reading frame 68	1.029	Other	other
Q3UQ44	IQGAP2	IQ motif containing GTPase activating protein 2	1.028	Cytoplasm	other
Q6NS46	PDCD11	programmed cell death 11	1.024	Nucleus	other
Q6ZQ03	FNBP4	formin binding protein 4	1.02	Nucleus	other
P62307	SNRPF	small nuclear ribonucleoprotein polypeptide F	1.016	Nucleus	other
Q80X90	FLNB	filamin B	1.009	Cytoplasm	other
O88271	CFDP1	craniofacial development protein 1	1.006	Extracellular Space	other
Q08288	LYAR	Ly1 antibody reactive	0.97	Plasma Membrane	other
Q9R099	TBL2	transducin beta like 2	0.959	Plasma Membrane	other
Q61103	DPF2	double PHD fingers 2	0.944	Nucleus	other
Q8QZV7	INTS13	integrator complex subunit 13	0.932	Cytoplasm	other
Q91YE7	RBM5	RNA binding motif protein 5	0.925	Nucleus	other
Q9D0B6	PBDC1	polysaccharide biosynthesis domain containing 1	0.922	Other	other
Q99JY3	GIMAP4	GTPase, IMAP family member 4	0.92	Nucleus	other
O88653	LAMTOR3	late endosomal/lysosomal adaptor, MAPK and MTOR activator 3	0.919	Cytoplasm	other
Q9QZQ8	H2AFY	H2A histone family member Y	0.915	Nucleus	other
Q8R4X3	RBM12	RNA binding motif protein 12	0.914	Nucleus	other
Q9JIG8	PRAF2	PRA1 domain family member 2	0.907	Other	other
P19536	Cox5b	cytochrome c oxidase subunit Vb	0.904	Cytoplasm	other
Q80U72	SCRIB	scribbled planar cell polarity protein	0.895	Cytoplasm	other
Q3UMB9	WASHC4	WASH complex subunit 4	0.895	Cytoplasm	other
Q9JIG7	CCDC22	coiled-coil domain containing 22	0.891	Cytoplasm	other
Q6NZN0	RBM26	RNA binding motif protein 26	0.884	Other	other
Q640M1	UTP14A	UTP14A, small subunit processome component	0.884	Nucleus	other
Q61699	HSPH1	heat shock protein family H (Hsp110) member 1	0.876	Cytoplasm	other
Q60949	TBC1D1	TBC1 domain family member 1	0.859	Nucleus	other
Q6PFR5	TRA2A	transformer 2 alpha homolog	0.859	Nucleus	other
Q91VI7	RNH1	ribonuclease/angiogenin inhibitor 1	0.849	Cytoplasm	other
Q64523	HIST2H2AC	histone cluster 2 H2A family member c	0.845	Nucleus	other
Q8K2T8	PAF1	PAF1 homolog, Paf1/RNA polymerase II complex component	0.834	Nucleus	other
Q8VIJ6	SFPQ	splicing factor proline and glutamine rich	0.834	Nucleus	other
Q8C0D4	ARHGAP12	Rho GTPase activating protein 12	0.828	Cytoplasm	other
Q8K003	TMA7	translation machinery associated 7 homolog	0.816	Other	other
Q64735	CR1L	complement C3b/C4b receptor 1 like	0.813	Plasma Membrane	other
Q921Y2	IMP3	IMP3, U3 small nucleolar ribonucleoprotein	0.811	Cytoplasm	other
Q8BQM4	HEATR3	HEAT repeat containing 3	0.807	Other	other
Q8BMC4	NOP9	NOP9 nucleolar protein	0.805	Nucleus	other
P07356	ANXA2	annexin A2	0.804	Plasma Membrane	other
Q91WN1	DNAJC9	DnaJ heat shock protein family (Hsp40) member C9	0.798	Nucleus	other
Q8VE37	RCC1	regulator of chromosome condensation 1	0.798	Cytoplasm	other
Q8C4B4	UNC119B	unc-119 lipid binding chaperone B	0.793	Cytoplasm	other
Q8R5J9	ARL6IP5	ADP ribosylation factor like GTPase 6 interacting protein 5	0.789	Cytoplasm	other
Q7TNC4	LUC7L2	LUC7 like 2, pre-mRNA splicing factor	0.788	Other	other
Q8BH43	WASF2	WAS protein family member 2	0.784	Plasma Membrane	other
P43277	HIST1H1D	histone cluster 1 H1 family member d	0.783	Nucleus	other
Q8K2A7	INTS10	integrator complex subunit 10	0.765	Nucleus	other
Q99J36	THUMPD1	THUMP domain containing 1	0.761	Nucleus	other
Q9DCE5	PAK1IP1	PAK1 interacting protein 1	0.759	Nucleus	other
P26369	U2AF2	U2 small nuclear RNA auxiliary factor 2	0.759	Nucleus	other
O54825	BYSL	bystin like	0.757	Nucleus	other
Q6ZQL4	WDR43	WD repeat domain 43	0.757	Nucleus	other
Q9CWI3	BCCIP	BRCA2 and CDKN1A interacting protein	0.756	Nucleus	other
P84104	SRSF3	serine and arginine rich splicing factor 3	0.756	Nucleus	other
Q80SY5	PRPF38B	pre-mRNA processing factor 38B	0.755	Other	other
Q8BGS2	Bola2	bolA-like 2 (E. coli)	0.751	Cytoplasm	other
Q9JHS3	LAMTOR2	late endosomal/lysosomal adaptor, MAPK and MTOR activator 2	0.75	Cytoplasm	other
Q9CYG7	TOMM34	translocase of outer mitochondrial membrane 34	0.746	Cytoplasm	other
Q9DBG7	SRPRA	SRP receptor alpha subunit	0.745	Cytoplasm	other
Q8BWW4	LARP4	La ribonucleoprotein domain family member 4	0.739	Cytoplasm	other
Q9EPV8	UBL5	ubiquitin like 5	0.736	Cytoplasm	other
Q9R0P4	C11orf58	chromosome 11 open reading frame 58	0.721	Other	other
Q8K2Q0	COMMD9	COMM domain containing 9	0.719	Cytoplasm	other
Q9CYI4	LUC7L	LUC7 like	0.718	Nucleus	other
D3YXK2	SAFB	scaffold attachment factor B	0.718	Nucleus	other
P84102	SERF2	small EDRK-rich factor 2	0.718	Other	other
Q6PCP5	Mff	mitochondrial fission factor	0.713	Cytoplasm	other
Q6P2K6	PPP4R3A	protein phosphatase 4 regulatory subunit 3A	0.706	Plasma Membrane	other
Q9CR70	Lage3	L antigen family, member 3	0.705	Nucleus	other
Q9CX00	IST1	IST1, ESCRT-III associated factor	0.703	Cytoplasm	other
P62806			0.7	other	other
Q9DCA5	BRIX1	BRX1, biogenesis of ribosomes	0.7	Nucleus	other
Q3TEA8	HP1BP3	heterochromatin protein 1 binding protein 3	0.694	Nucleus	other
Q9CQD4	2610002M06Rik	RIKEN cDNA 2610002M06 gene	0.69	Cytoplasm	other
O08808	DIAPH1	diaphanous related formin 1	0.687	Plasma Membrane	other
Q99NH0	ANKRD17	ankyrin repeat domain 17	0.679	Nucleus	other
Q8BYY4	TTC39B	tetratricopeptide repeat domain 39B	0.679	Other	other
Q62189	Gm8587/Snrpa	small nuclear ribonucleoprotein polypeptide A	0.677	Nucleus	other
Q3UGS4	MCRIP1	MAPK regulated corepressor interacting protein 1	0.657	Nucleus	other
Q8C708	C16orf54	chromosome 16 open reading frame 54	0.656	Extracellular Space	other
O88983	STX8	syntaxin 8	0.656	Plasma Membrane	other
Q921T2	TOR1AIP1	torsin 1A interacting protein 1	0.653	Nucleus	other
Q99M87	DNAJA3	DnaJ heat shock protein family (Hsp40) member A3	0.652	Cytoplasm	other
Q9D554	SF3A3	splicing factor 3a subunit 3	0.651	Nucleus	other
Q922U1	PRPF3	pre-mRNA processing factor 3	0.649	Nucleus	other
P84089	ERH	ERH, mRNA splicing and mitosis factor	0.646	Nucleus	other
Q8CGP1	HIST1H2BK	histone cluster 1 H2B family member k	0.643	Nucleus	other
Q9CY66	Gar1	GAR1 ribonucleoprotein	0.64	Nucleus	other
Q80W00	PPP1R10	protein phosphatase 1 regulatory subunit 10	0.638	Nucleus	other
Q99MR6	SRRT	serrate, RNA effector molecule	0.63	Nucleus	other
Q922L6	NELFCD	negative elongation factor complex member C/D	0.629	Nucleus	other
Q9D0T1	SNU13	small nuclear ribonucleoprotein 13	0.628	Nucleus	other
Q4VBE8	WDR18	WD repeat domain 18	0.621	Nucleus	other
P15864	HIST1H1C	histone cluster 1 H1 family member c	0.613	Nucleus	other
Q8K400	STXBP5	syntaxin binding protein 5	0.613	Plasma Membrane	other
Q8BYK6	YTHDF3	YTH N6-methyladenosine RNA binding protein 3	0.613	Cytoplasm	other
Q505B7	ZBTB8OS	zinc finger and BTB domain containing 8 opposite strand	0.608	Cytoplasm	other
Q9Z0E0	NCDN	neurochondrin	0.607	Cytoplasm	other
Q99LI7	CSTF3	cleavage stimulation factor subunit 3	0.605	Nucleus	other
Q8BHD7	PTBP3	polypyrimidine tract binding protein 3	0.602	Nucleus	other
Q6P8I4	PCNP	PEST proteolytic signal containing nuclear protein	0.6	Nucleus	other
Q99KG3	RBM10	RNA binding motif protein 10	0.598	Nucleus	other
P47758	SRPRB	SRP receptor beta subunit	0.598	Cytoplasm	other
Q99N93	MRPL16	mitochondrial ribosomal protein L16	0.597	Cytoplasm	other
Q91W53	GOLGA7	golgin A7	0.593	Cytoplasm	other
Q922K7	NOP2	NOP2 nucleolar protein	0.591	Nucleus	other
Q9JJA4	WDR12	WD repeat domain 12	0.586	Cytoplasm	other
Q8BGB5	LIMD2	LIM domain containing 2	0.571	Other	other
Q9DAT2	MRGBP	MRG domain binding protein	0.57	Nucleus	other
Q6PDM2	SRSF1	serine and arginine rich splicing factor 1	0.57	Nucleus	other
P62996	TRA2B	transformer 2 beta homolog	0.568	Nucleus	other
Q8BJU0	SGTA	small glutamine rich tetratricopeptide repeat containing alpha	0.565	Cytoplasm	other
Q8K2F8	LSM14A	LSM14A, mRNA processing body assembly factor	0.558	Cytoplasm	other
P47915	Rpl29 (includes others)	ribosomal protein L29	0.557	Cytoplasm	other
P59708	SF3B6	splicing factor 3b subunit 6	0.554	Nucleus	other
Q9Z130	HNRNPDL	heterogeneous nuclear ribonucleoprotein D like	0.552	Nucleus	other
Q8R3Q6	CCDC58	coiled-coil domain containing 58	0.549	Cytoplasm	other
Q8K2K6	AGFG1	ArfGAP with FG repeats 1	0.548	Nucleus	other
Q8BYW1	ARHGAP25	Rho GTPase activating protein 25	0.546	Cytoplasm	other
Q8C4Y3	NELFB	negative elongation factor complex member B	0.542	Nucleus	other
Q6ZPZ3	ZC3H4	zinc finger CCCH-type containing 4	0.542	Nucleus	other
P53026	RPL10A	ribosomal protein L10a	0.538	Nucleus	other
Q62376	SNRNP70	small nuclear ribonucleoprotein U1 subunit 70	0.537	Nucleus	other
Q9D0E1	HNRNPM	heterogeneous nuclear ribonucleoprotein M	0.535	Nucleus	other
Q9CWL8	CTNNBL1	catenin beta like 1	0.534	Nucleus	other
Q9Z315	SART1	SART1, U4/U6.U5 tri-snRNP-associated protein 1	0.532	Nucleus	other
Q9DBD5	PELP1	proline, glutamate and leucine rich protein 1	0.526	Nucleus	other
Q99K48	NONO	non-POU domain containing octamer binding	0.524	Nucleus	other
Q9EST5	Anp32b	acidic (leucine-rich) nuclear phosphoprotein 32 family, member B	0.523	Nucleus	other
P62311	LSM3	LSM3 homolog, U6 small nuclear RNA and mRNA degradation associated	0.523	Nucleus	other
Q9CQ22	LAMTOR1	late endosomal/lysosomal adaptor, MAPK and MTOR activator 1	0.522	Plasma Membrane	other
Q9CXW4	RPL11	ribosomal protein L11	0.509	Cytoplasm	other
P57784	SNRPA1	small nuclear ribonucleoprotein polypeptide A'	0.508	Nucleus	other
P43276	Hist1h1b	histone cluster 1, H1b	0.506	Nucleus	other
Q9EQK5	MVP	major vault protein	0.506	Nucleus	other
Q9CRB2	NHP2	NHP2 ribonucleoprotein	0.495	Nucleus	other
Q8C9V1	TBC1D10C	TBC1 domain family member 10C	0.494	Nucleus	other
Q08943	SSRP1	structure specific recognition protein 1	0.491	Nucleus	other
Q9R1C7	PRPF40A	pre-mRNA processing factor 40 homolog A	0.49	Nucleus	other
Q3UEB3	PUF60	poly(U) binding splicing factor 60	0.49	Nucleus	other
O35691	PNN	pinin, desmosome associated protein	0.487	Plasma Membrane	other
Q9JII5	Dazap1	DAZ associated protein 1	0.482	Cytoplasm	other
Q66JS6			0.479	other	other
Q9QYC0	ADD1	adducin 1	0.479	Cytoplasm	other
Q08122	TLE3	transducin like enhancer of split 3	0.479	Nucleus	other
P97814	PSTPIP1	proline-serine-threonine phosphatase interacting protein 1	0.478	Cytoplasm	other
P27048	SNRPB	small nuclear ribonucleoprotein polypeptides B and B1	0.476	Nucleus	other
P61804	DAD1	defender against cell death 1	0.475	Cytoplasm	other
P26350	Ptma (includes others)	prothymosin alpha	0.474	Nucleus	other
Q9CRD2	EMC2	ER membrane protein complex subunit 2	0.473	Nucleus	other
Q99JG7	TNIP2	TNFAIP3 interacting protein 2	0.471	Cytoplasm	other
P62313	LSM6	LSM6 homolog, U6 small nuclear RNA and mRNA degradation associated	0.467	Nucleus	other
Q8BWZ3	NAA25	N(alpha)-acetyltransferase 25, NatB auxiliary subunit	0.463	Cytoplasm	other
P60710	ACTB	actin beta	0.46	Cytoplasm	other
Q3URQ0	TEX10	testis expressed 10	0.46	Nucleus	other
Q8BNW9	KBTBD11	kelch repeat and BTB domain containing 11	0.455	Other	other
Q9D1R9	Rpl34 (includes others)	ribosomal protein L34	0.454	Cytoplasm	other
A2AF47	DOCK11	dedicator of cytokinesis 11	0.452	Cytoplasm	other
P32233	DRG1	developmentally regulated GTP binding protein 1	0.45	Cytoplasm	other
Q9EP82	WDR4	WD repeat domain 4	0.444	Nucleus	other
Q9JL26	Fmnl1	formin-like 1	0.443	Cytoplasm	other
O35900	LSM2	LSM2 homolog, U6 small nuclear RNA and mRNA degradation associated	0.435	Nucleus	other
P43275	Hist1h1a	histone cluster 1, H1a	0.433	Nucleus	other
P19253	RPL13A	ribosomal protein L13a	0.431	Cytoplasm	other
O08583	Alyref	Aly/REF export factor	0.428	Nucleus	other
Q9D6K5	SYNJ2BP	synaptojanin 2 binding protein	0.427	Cytoplasm	other
P43274	Hist1h1e	histone cluster 1, H1e	0.423	Nucleus	other
Q3TWW8	SRSF6	serine and arginine rich splicing factor 6	0.422	Nucleus	other
P62320	SNRPD3	small nuclear ribonucleoprotein D3 polypeptide	0.421	Nucleus	other
P97452	BOP1	block of proliferation 1	0.419	Nucleus	other
Q9EPU4	CPSF1	cleavage and polyadenylation specific factor 1	0.418	Nucleus	other
P61255	RPL26	ribosomal protein L26	0.417	Cytoplasm	other
P62317	SNRPD2	small nuclear ribonucleoprotein D2 polypeptide	0.417	Nucleus	other
Q9CYZ2	TPD52L2	tumor protein D52 like 2	0.415	Cytoplasm	other
Q9JHE7	TSSC4	tumor suppressing subtransferable candidate 4	0.415	Other	other
Q6ZWM4	LSM8	LSM8 homolog, U6 small nuclear RNA associated	0.414	Nucleus	other
Q9CT10	RANBP3	RAN binding protein 3	0.414	Nucleus	other
P62717	RPL18A	ribosomal protein L18a	0.414	Cytoplasm	other
Q9CQF3	NUDT21	nudix hydrolase 21	0.411	Nucleus	other
Q9Z2X1	HNRNPF	heterogeneous nuclear ribonucleoprotein F	0.409	Nucleus	other
O88532	ZFR	zinc finger RNA binding protein	0.408	Nucleus	other
Q62241	Snrpc	U1 small nuclear ribonucleoprotein C	0.402	Nucleus	other
Q0VGB7	PPP4R2	protein phosphatase 4 regulatory subunit 2	0.4	Cytoplasm	other
Q8C5P5	NT5DC1	5'-nucleotidase domain containing 1	0.399	Other	other
O55142	RPL35A	ribosomal protein L35a	0.394	Cytoplasm	other
Q5SWD9	TSR1	TSR1, ribosome maturation factor	0.391	Nucleus	other
Q8K4Z5	SF3A1	splicing factor 3a subunit 1	0.39	Nucleus	other
O88569	HNRNPA2B1	heterogeneous nuclear ribonucleoprotein A2/B1	0.386	Nucleus	other
A2AQ19	RTF1	RTF1 homolog, Paf1/RNA polymerase II complex component	0.385	Nucleus	other
Q9QZ73	DCUN1D1	defective in cullin neddylation 1 domain containing 1	0.383	Nucleus	other
Q922Q8	LRRC59	leucine rich repeat containing 59	0.381	Cytoplasm	other
P48024	Eif1	eukaryotic translation initiation factor 1	0.38	Other	other
Q9JJI8	RPL38	ribosomal protein L38	0.38	Cytoplasm	other
P14869	RPLP0	ribosomal protein lateral stalk subunit P0	0.38	Cytoplasm	other
Q80ZS3	MRPS26	mitochondrial ribosomal protein S26	0.379	Cytoplasm	other
P21107	TPM3	tropomyosin 3	0.379	Cytoplasm	other
P63037	DNAJA1	DnaJ heat shock protein family (Hsp40) member A1	0.375	Nucleus	other
P63325	RPS10	ribosomal protein S10	0.374	Cytoplasm	other
Q8R550	SH3KBP1	SH3 domain containing kinase binding protein 1	0.374	Cytoplasm	other
Q3THW5	H2AFV	H2A histone family member V	0.373	Nucleus	other
P47963	RPL13	ribosomal protein L13	0.372	Nucleus	other
P62305	Snrpe	small nuclear ribonucleoprotein E	0.37	Nucleus	other
P09405	NCL	nucleolin	0.367	Nucleus	other
Q9DBY8	NVL	nuclear VCP-like	0.366	Nucleus	other
O35226	PSMD4	proteasome 26S subunit, non-ATPase 4	0.363	Cytoplasm	other
Q9D883	U2af1	U2 small nuclear ribonucleoprotein auxiliary factor (U2AF) 1	0.363	Nucleus	other
Q8BTM8	FLNA	filamin A	0.362	Cytoplasm	other
Q8CGZ0	CHERP	calcium homeostasis endoplasmic reticulum protein	0.36	Cytoplasm	other
P21619	LMNB2	lamin B2	0.36	Nucleus	other
P35980	RPL18	ribosomal protein L18	0.359	Cytoplasm	other
Q99J56	DERL1	derlin 1	0.358	Cytoplasm	other
P62911	Rpl32	ribosomal protein L32	0.358	Cytoplasm	other
Q6P5G6	UBXN7	UBX domain protein 7	0.354	Nucleus	other
Q8K4G5	ABLIM1	actin binding LIM protein 1	0.353	Cytoplasm	other
P99027	RPLP2	ribosomal protein lateral stalk subunit P2	0.352	Cytoplasm	other
Q8BIQ5	CSTF2	cleavage stimulation factor subunit 2	0.35	Nucleus	other
Q9CZ44	NSFL1C	NSFL1 cofactor	0.35	Cytoplasm	other
Q9R020	Zranb2	zinc finger, RAN-binding domain containing 2	0.35	Nucleus	other
Q99LD9	EIF2B2	eukaryotic translation initiation factor 2B subunit beta	0.349	Cytoplasm	other
Q3TIV5	Zc3h15	zinc finger CCCH-type containing 15	0.349	Nucleus	other
Q7TQK1	INTS7	integrator complex subunit 7	0.348	Nucleus	other
P62858	RPS28	ribosomal protein S28	0.344	Cytoplasm	other
P61961	UFM1	ubiquitin fold modifier 1	0.34	Cytoplasm	other
P14131	RPS16	ribosomal protein S16	0.338	Cytoplasm	other
P35979	RPL12	ribosomal protein L12	0.337	Nucleus	other
P47962	RPL5	ribosomal protein L5	0.337	Cytoplasm	other
Q6DID3	SCAF8	SR-related CTD associated factor 8	0.337	Nucleus	other
Q925I1	ATAD3A	ATPase family, AAA domain containing 3A	0.336	Cytoplasm	other
P62862	FAU	FAU, ubiquitin like and ribosomal protein S30 fusion	0.334	Cytoplasm	other
P12815	PDCD6	programmed cell death 6	0.331	Cytoplasm	other
Q61749	EIF2B4	eukaryotic translation initiation factor 2B subunit delta	0.329	Cytoplasm	other
P26041	MSN	moesin	0.329	Plasma Membrane	other
P62751	Rpl23a	ribosomal protein L23A	0.328	Nucleus	other
Q8VE70	PDCD10	programmed cell death 10	0.323	Cytoplasm	other
P62889	RPL30	ribosomal protein L30	0.323	Cytoplasm	other
Q921M3	SF3B3	splicing factor 3b subunit 3	0.323	Nucleus	other
Q91XI1	DUS3L	dihydrouridine synthase 3 like	0.321	Other	other
Q60865	CAPRIN1	cell cycle associated protein 1	0.32	Plasma Membrane	other
P60867	RPS20	ribosomal protein S20	0.319	Cytoplasm	other
P16254	SRP14	signal recognition particle 14	0.319	Cytoplasm	other
P70122	SBDS	SBDS, ribosome maturation factor	0.318	Nucleus	other
P27612	PLAA	phospholipase A2 activating protein	0.316	Cytoplasm	other
P83882	Rpl36a	ribosomal protein L36A	0.312	Cytoplasm	other
P62918	RPL8	ribosomal protein L8	0.311	Cytoplasm	other
O54957	LAT	linker for activation of T-cells	0.31	Plasma Membrane	other
Q8BTW3	EXOSC6	exosome component 6	0.309	Nucleus	other
Q8CI11	GNL3	G protein nucleolar 3	0.308	Nucleus	other
Q5SUF2	LUC7L3	LUC7 like 3 pre-mRNA splicing factor	0.307	Nucleus	other
P70372	ELAVL1	ELAV like RNA binding protein 1	0.306	Cytoplasm	other
Q9Z204	HNRNPC	heterogeneous nuclear ribonucleoprotein C (C1/C2)	0.304	Nucleus	other
Q8CCF0	PRPF31	pre-mRNA processing factor 31	0.303	Nucleus	other
P62830	RPL23	ribosomal protein L23	0.303	Cytoplasm	other
P62702	RPS4Y1	ribosomal protein S4, Y-linked 1	0.303	Cytoplasm	other
Q9CQ92	FIS1	fission, mitochondrial 1	0.301	Cytoplasm	other
Q9CY58	SERBP1	SERPINE1 mRNA binding protein 1	0.301	Cytoplasm	other
P97351	Rps3a1	ribosomal protein S3A1	0.297	Cytoplasm	other
Q9JLI8	SART3	squamous cell carcinoma antigen recognized by T-cells 3	0.293	Nucleus	other
O54879	Hmgb3	high mobility group box 3	0.29	Nucleus	other
Q9CXI5	MANF	mesencephalic astrocyte derived neurotrophic factor	0.289	Extracellular Space	other
Q9CR57	RPL14	ribosomal protein L14	0.289	Cytoplasm	other
Q9CQR2	RPS21	ribosomal protein S21	0.289	Cytoplasm	other
P59328	WDHD1	WD repeat and HMG-box DNA binding protein 1	0.288	Nucleus	other
P97461	RPS5	ribosomal protein S5	0.284	Cytoplasm	other
Q80X50	Ubap2l	ubiquitin-associated protein 2-like	0.284	Nucleus	other
Q9DAW6	PRPF4	pre-mRNA processing factor 4	0.28	Nucleus	other
P51410	RPL9	ribosomal protein L9	0.279	Nucleus	other
Q9CQH7	BTF3L4	basic transcription factor 3 like 4	0.275	Other	other
Q8BTI8	Srrm2	serine/arginine repetitive matrix 2	0.275	Nucleus	other
Q9JJ28	FLII	FLII, actin remodeling protein	0.272	Nucleus	other
Q91YT7	YTHDF2	YTH N6-methyladenosine RNA binding protein 2	0.271	Cytoplasm	other
Q99L47	ST13	ST13, Hsp70 interacting protein	0.269	Cytoplasm	other
Q6A026	PDS5A	PDS5 cohesin associated factor A	0.266	Nucleus	other
P42567	EPS15	epidermal growth factor receptor pathway substrate 15	0.264	Cytoplasm	other
P62855	RPS26	ribosomal protein S26	0.251	Cytoplasm	other
P62270	RPS18	ribosomal protein S18	0.242	Cytoplasm	other
P14733	LMNB1	lamin B1	0.24	Nucleus	other
P41105	RPL28	ribosomal protein L28	0.239	Cytoplasm	other
P97822	Anp32e	acidic (leucine-rich) nuclear phosphoprotein 32 family, member E	0.238	Cytoplasm	other
Q61990	PCBP2	poly(rC) binding protein 2	0.234	Nucleus	other
Q99PV0	PRPF8	pre-mRNA processing factor 8	0.23	Nucleus	other
P14115	RPL27A	ribosomal protein L27a	0.228	Cytoplasm	other
P62852	RPS25	ribosomal protein S25	0.218	Cytoplasm	other
P47911	RPL6	ribosomal protein L6	0.208	Nucleus	other
Q9CZX8	RPS19	ribosomal protein S19	0.207	Cytoplasm	other
P46061	RANGAP1	Ran GTPase activating protein 1	0.199	Nucleus	other
Q9CXW3	CACYBP	calcyclin binding protein	0.195	Nucleus	other
Q9CW03	SMC3	structural maintenance of chromosomes 3	0.185	Nucleus	other
P62245	RPS15A	ribosomal protein S15a	0.182	Cytoplasm	other
Q99NB9	SF3B1	splicing factor 3b subunit 1	0.177	Nucleus	other
O35381	Anp32a	acidic (leucine-rich) nuclear phosphoprotein 32 family, member A	0.176	Nucleus	other
Q8BL97	SRSF7	serine and arginine rich splicing factor 7	0.151	Nucleus	other
Q61166	MAPRE1	microtubule associated protein RP/EB family member 1	0.148	Cytoplasm	other
Q61316	HSPA4	heat shock protein family A (Hsp70) member 4	-0.163	Cytoplasm	other
P68369	TUBA1A	tubulin alpha 1a	-0.176	Cytoplasm	other
P62259	YWHAE	tyrosine 3-monooxygenase/tryptophan 5-monooxygenase activation protein epsilon	-0.179	Cytoplasm	other
P11983	TCP1	t-complex 1	-0.193	Cytoplasm	other
Q9JHJ0	TMOD3	tropomodulin 3	-0.208	Cytoplasm	other
P80318	CCT3	chaperonin containing TCP1 subunit 3	-0.212	Cytoplasm	other
O70194	EIF3D	eukaryotic translation initiation factor 3 subunit D	-0.22	Cytoplasm	other
Q8C1B7	2011-09-01	septin 11	-0.224	Nucleus	other
Q9CY50	SSR1	signal sequence receptor subunit 1	-0.225	Cytoplasm	other
P54728	RAD23B	RAD23 homolog B, nucleotide excision repair protein	-0.229	Nucleus	other
Q9D1G1	RAB1B	RAB1B, member RAS oncogene family	-0.23	Cytoplasm	other
Q9CQ48	NUDCD2	NudC domain containing 2	-0.236	Cytoplasm	other
Q8VEE4	RPA1	replication protein A1	-0.241	Nucleus	other
P08113	HSP90B1	heat shock protein 90 beta family member 1	-0.247	Cytoplasm	other
P16045	LGALS1	galectin 1	-0.252	Extracellular Space	other
Q99PG2	OGFR	opioid growth factor receptor	-0.252	Plasma Membrane	other
Q3THE2	MYL12A	myosin light chain 12A	-0.256	Cytoplasm	other
Q8BRT1	CLASP2	cytoplasmic linker associated protein 2	-0.258	Cytoplasm	other
O88342	WDR1	WD repeat domain 1	-0.262	Extracellular Space	other
Q6GQT9	NOMO1 (includes others)	NODAL modulator 1	-0.272	Plasma Membrane	other
Q8BVY0	RSL1D1	ribosomal L1 domain containing 1	-0.272	Nucleus	other
P47753	CAPZA1	capping actin protein of muscle Z-line alpha subunit 1	-0.279	Cytoplasm	other
O55131	2007-09-01	septin 7	-0.279	Cytoplasm	other
Q68FD5	CLTC	clathrin heavy chain	-0.286	Plasma Membrane	other
Q9DCF9	SSR3	signal sequence receptor subunit 3	-0.288	Cytoplasm	other
P14576			-0.291	other	other
Q62418	DBNL	drebrin like	-0.291	Cytoplasm	other
P61759	VBP1	VHL binding protein 1	-0.299	Cytoplasm	other
Q60787	LCP2	lymphocyte cytosolic protein 2	-0.3	Cytoplasm	other
P80317	CCT6A	chaperonin containing TCP1 subunit 6A	-0.301	Cytoplasm	other
A2A432	CUL4B	cullin 4B	-0.307	Nucleus	other
Q8VD31	TAPBPL	TAP binding protein like	-0.319	Cytoplasm	other
Q9D3U0	PUS10	pseudouridylate synthase 10	-0.329	Other	other
P47757	CAPZB	capping actin protein of muscle Z-line beta subunit	-0.334	Cytoplasm	other
Q99KU0	VMP1	vacuole membrane protein 1	-0.334	Plasma Membrane	other
O08585	CLTA	clathrin light chain A	-0.341	Plasma Membrane	other
Q99JB2	STOML2	stomatin like 2	-0.342	Plasma Membrane	other
Q9JKY0	CNOT9	CCR4-NOT transcription complex subunit 9	-0.347	Cytoplasm	other
Q922D4	PPP6R3	protein phosphatase 6 regulatory subunit 3	-0.347	Cytoplasm	other
Q9D1P4	CHORDC1	cysteine and histidine rich domain containing 1	-0.348	Other	other
Q5U458	DNAJC11	DnaJ heat shock protein family (Hsp40) member C11	-0.356	Cytoplasm	other
Q9D8W5	PSMD12	proteasome 26S subunit, non-ATPase 12	-0.36	Cytoplasm	other
P26516	PSMD7	proteasome 26S subunit, non-ATPase 7	-0.364	Cytoplasm	other
P49710	HCLS1	hematopoietic cell-specific Lyn substrate 1	-0.365	Nucleus	other
Q9DBG3	Ap2b1	adaptor-related protein complex 2, beta 1 subunit	-0.368	Plasma Membrane	other
Q91YI4	ARRB2	arrestin beta 2	-0.369	Cytoplasm	other
P58742	AAAS	aladin WD repeat nucleoporin	-0.37	Nucleus	other
P54103	DNAJC2	DnaJ heat shock protein family (Hsp40) member C2	-0.372	Nucleus	other
Q3U7R1	ESYT1	extended synaptotagmin 1	-0.372	Cytoplasm	other
Q505F5	LRRC47	leucine rich repeat containing 47	-0.372	Other	other
Q8VBT9	ASPSCR1	ASPSCR1, UBX domain containing tether for SLC2A4	-0.377	Cytoplasm	other
Q9CPW4	ARPC5	actin related protein 2/3 complex subunit 5	-0.382	Cytoplasm	other
Q9WVA4	TAGLN2	transgelin 2	-0.389	Cytoplasm	other
Q9R059	FHL3	four and a half LIM domains 3	-0.392	Plasma Membrane	other
Q9CXE7	TMED5	transmembrane p24 trafficking protein 5	-0.394	Cytoplasm	other
Q9R1T4	2006-09-01	septin 6	-0.398	Cytoplasm	other
P26039	TLN1	talin 1	-0.403	Plasma Membrane	other
P80313	CCT7	chaperonin containing TCP1 subunit 7	-0.404	Cytoplasm	other
Q99KJ8	DCTN2	dynactin subunit 2	-0.404	Cytoplasm	other
Q3UPL0	SEC31A	SEC31 homolog A, COPII coat complex component	-0.405	Cytoplasm	other
P05213	TUBA1B	tubulin alpha 1b	-0.405	Cytoplasm	other
P62962	PFN1	profilin 1	-0.406	Cytoplasm	other
Q6ZQK0	NCAPD3	non-SMC condensin II complex subunit D3	-0.41	Nucleus	other
Q61210	ARHGEF1	Rho guanine nucleotide exchange factor 1	-0.412	Cytoplasm	other
Q9D7E4	C19orf25	chromosome 19 open reading frame 25	-0.418	Other	other
Q9WU78	PDCD6IP	programmed cell death 6 interacting protein	-0.422	Cytoplasm	other
Q791V5	MTCH2	mitochondrial carrier 2	-0.425	Cytoplasm	other
P55821	STMN2	stathmin 2	-0.428	Plasma Membrane	other
Q91YW3	DNAJC3	DnaJ heat shock protein family (Hsp40) member C3	-0.433	Cytoplasm	other
Q6IRU2	Tpm4	tropomyosin 4	-0.435	Cytoplasm	other
Q61768	KIF5B	kinesin family member 5B	-0.437	Cytoplasm	other
O08788	DCTN1	dynactin subunit 1	-0.442	Cytoplasm	other
Q9CWK3	CD2BP2	CD2 cytoplasmic tail binding protein 2	-0.445	Cytoplasm	other
Q8K0G5	EIPR1	EARP complex and GARP complex interacting protein 1	-0.446	Other	other
P38647	HSPA9	heat shock protein family A (Hsp70) member 9	-0.45	Cytoplasm	other
Q99P72	RTN4	reticulon 4	-0.451	Cytoplasm	other
Q9CQU3	RER1	retention in endoplasmic reticulum sorting receptor 1	-0.452	Cytoplasm	other
Q9ERD8	PARVG	parvin gamma	-0.453	Cytoplasm	other
O89053	CORO1A	coronin 1A	-0.455	Cytoplasm	other
P47754	CAPZA2	capping actin protein of muscle Z-line alpha subunit 2	-0.457	Cytoplasm	other
P27546	MAP4	microtubule associated protein 4	-0.457	Cytoplasm	other
Q9DB27	MCTS1	MCTS1, re-initiation and release factor	-0.46	Cytoplasm	other
Q8CBY8	DCTN4	dynactin subunit 4	-0.462	Nucleus	other
Q3U1J4	DDB1	damage specific DNA binding protein 1	-0.462	Nucleus	other
Q8BZM1	GLMN	glomulin, FKBP associated protein	-0.464	Cytoplasm	other
Q6NZC7	SEC23IP	SEC23 interacting protein	-0.465	Cytoplasm	other
Q9Z1B5	MAD2L1	mitotic arrest deficient 2 like 1	-0.471	Nucleus	other
Q99NB8	UBQLN4	ubiquilin 4	-0.471	Cytoplasm	other
Q9CPR1	RWDD4	RWD domain containing 4	-0.487	Other	other
Q9QXS1	PLEC	plectin	-0.489	Cytoplasm	other
Q8R1Q8	DYNC1LI1	dynein cytoplasmic 1 light intermediate chain 1	-0.495	Cytoplasm	other
P26040	EZR	ezrin	-0.508	Plasma Membrane	other
Q9CYA6	ZCCHC8	zinc finger CCHC-type containing 8	-0.51	Nucleus	other
Q91XD6	VPS36	vacuolar protein sorting 36 homolog	-0.511	Cytoplasm	other
P61164	ACTR1A	ARP1 actin related protein 1 homolog A	-0.514	Cytoplasm	other
O08547	SEC22B	SEC22 homolog B, vesicle trafficking protein (gene/pseudogene)	-0.515	Cytoplasm	other
O35887	CALU	calumenin	-0.527	Cytoplasm	other
Q9Z0H4	CELF2	CUGBP Elav-like family member 2	-0.529	Nucleus	other
P35564	CANX	calnexin	-0.532	Cytoplasm	other
O55126	NIPSNAP2	nipsnap homolog 2	-0.535	Plasma Membrane	other
P68372	TUBB4B	tubulin beta 4B class IVb	-0.535	Cytoplasm	other
Q8BXA5	CLPTM1L	CLPTM1 like	-0.536	Other	other
Q9CQJ2	PIH1D1	PIH1 domain containing 1	-0.539	Nucleus	other
Q61233	LCP1	lymphocyte cytosolic protein 1	-0.545	Cytoplasm	other
Q8C147	DOCK8	dedicator of cytokinesis 8	-0.548	Cytoplasm	other
Q9CY94	GINS3	GINS complex subunit 3	-0.551	Nucleus	other
P62892	RPL39	ribosomal protein L39	-0.551	Cytoplasm	other
Q8R317	UBQLN1	ubiquilin 1	-0.557	Cytoplasm	other
Q7TSI3	PPP6R1	protein phosphatase 6 regulatory subunit 1	-0.564	Cytoplasm	other
Q9JLQ2	GIT2	GIT ArfGAP 2	-0.571	Nucleus	other
Q7TQH0	ATXN2L	ataxin 2 like	-0.572	Nucleus	other
Q9D6T0	NOSIP	nitric oxide synthase interacting protein	-0.576	Cytoplasm	other
Q9CR20	IER3IP1	immediate early response 3 interacting protein 1	-0.583	Cytoplasm	other
Q91WG4	ELP2	elongator acetyltransferase complex subunit 2	-0.591	Cytoplasm	other
Q9CQI6	COTL1	coactosin like F-actin binding protein 1	-0.592	Cytoplasm	other
A2AJI0	MAP7D1	MAP7 domain containing 1	-0.592	Cytoplasm	other
Q64310	SURF4	surfeit 4	-0.592	Cytoplasm	other
Q9R0Q6	ARPC1A	actin related protein 2/3 complex subunit 1A	-0.593	Extracellular Space	other
P68368	TUBA4A	tubulin alpha 4a	-0.597	Cytoplasm	other
Q9WVK4	EHD1	EH domain containing 1	-0.615	Cytoplasm	other
Q3TBT3	TMEM173	transmembrane protein 173	-0.617	Cytoplasm	other
O70318	EPB41L2	erythrocyte membrane protein band 4.1 like 2	-0.626	Plasma Membrane	other
P54227	STMN1	stathmin 1	-0.626	Cytoplasm	other
Q8C7X2	EMC1	ER membrane protein complex subunit 1	-0.629	Plasma Membrane	other
P24452	CAPG	capping actin protein, gelsolin like	-0.637	Nucleus	other
Q9CZ04	COPS7A	COP9 signalosome subunit 7A	-0.64	Cytoplasm	other
Q91VY9	ZNF622	zinc finger protein 622	-0.644	Nucleus	other
Q80YW0	CYTH4	cytohesin 4	-0.65	Cytoplasm	other
P60670	NPLOC4	NPL4 homolog, ubiquitin recognition factor	-0.651	Nucleus	other
P54729	NUB1	negative regulator of ubiquitin like proteins 1	-0.651	Nucleus	other
P70460	VASP	vasodilator stimulated phosphoprotein	-0.652	Plasma Membrane	other
Q9QXT0	CNPY2	canopy FGF signaling regulator 2	-0.656	Plasma Membrane	other
P83887	TUBG1	tubulin gamma 1	-0.665	Cytoplasm	other
Q9CX30	YIF1B	Yip1 interacting factor homolog B, membrane trafficking protein	-0.665	Cytoplasm	other
Q9D1L0	CHCHD2	coiled-coil-helix-coiled-coil-helix domain containing 2	-0.667	Cytoplasm	other
Q9CQV1	PAM16	presequence translocase associated motor 16	-0.668	Cytoplasm	other
Q8BQ30	PPP1R18	protein phosphatase 1 regulatory subunit 18	-0.669	Other	other
Q9JLQ0	CD2AP	CD2 associated protein	-0.689	Cytoplasm	other
Q922J3	CLIP1	CAP-Gly domain containing linker protein 1	-0.694	Cytoplasm	other
B2RXR6	ANKRD44	ankyrin repeat domain 44	-0.697	Other	other
Q9R061	NUBP2	nucleotide binding protein 2	-0.699	Nucleus	other
Q8CFE2	HPF1	histone PARylation factor 1	-0.7	Nucleus	other
Q9D8T7	SLIRP	SRA stem-loop interacting RNA binding protein	-0.708	Cytoplasm	other
Q9EQ80	NIF3L1	NGG1 interacting factor 3 like 1	-0.71	Cytoplasm	other
Q3UPH1	PRRC1	proline rich coiled-coil 1	-0.718	Other	other
O35601	FYB1	FYN binding protein 1	-0.732	Nucleus	other
Q99JN2	KLHL22	kelch like family member 22	-0.748	Cytoplasm	other
Q9JKF1	IQGAP1	IQ motif containing GTPase activating protein 1	-0.751	Cytoplasm	other
Q9DBS1	TMEM43	transmembrane protein 43	-0.753	Nucleus	other
Q8N7N5	DCAF8	DDB1 and CUL4 associated factor 8	-0.762	Nucleus	other
O08579	EMD	emerin	-0.771	Nucleus	other
Q8BTZ4	ANAPC5	anaphase promoting complex subunit 5	-0.773	Nucleus	other
P97371	PSME1	proteasome activator subunit 1	-0.774	Cytoplasm	other
Q91VH6	MEMO1	mediator of cell motility 1	-0.781	Cytoplasm	other
B2RUP2	UNC13D	unc-13 homolog D	-0.787	Cytoplasm	other
Q9D8C4	IFI35	interferon induced protein 35	-0.797	Nucleus	other
Q9WUK4	RFC2	replication factor C subunit 2	-0.798	Nucleus	other
P97315	CSRP1	cysteine and glycine rich protein 1	-0.814	Nucleus	other
Q8K2Z4	NCAPD2	non-SMC condensin I complex subunit D2	-0.816	Nucleus	other
Q8C156	NCAPH	non-SMC condensin I complex subunit H	-0.83	Nucleus	other
P70202	LXN	latexin	-0.834	Cytoplasm	other
Q8BHE8	MAIP1	matrix AAA peptidase interacting protein 1	-0.836	Cytoplasm	other
Q7TNG5	EML2	echinoderm microtubule associated protein like 2	-0.837	Cytoplasm	other
P97352	S100A13	S100 calcium binding protein A13	-0.838	Cytoplasm	other
P70441	SLC9A3R1	SLC9A3 regulator 1	-0.844	Plasma Membrane	other
Q8K4I3	ARHGEF6	Rac/Cdc42 guanine nucleotide exchange factor 6	-0.856	Cytoplasm	other
Q9DCB8	ISCA2	iron-sulfur cluster assembly 2	-0.866	Cytoplasm	other
Q99J83	ATG5	autophagy related 5	-0.868	Cytoplasm	other
P48428	TBCA	tubulin folding cofactor A	-0.87	Cytoplasm	other
Q9D023	MPC2	mitochondrial pyruvate carrier 2	-0.871	Plasma Membrane	other
Q91VW3	SH3BGRL3	SH3 domain binding glutamate rich protein like 3	-0.879	Nucleus	other
O08539	BIN1	bridging integrator 1	-0.882	Nucleus	other
Q9ES97	RTN3	reticulon 3	-0.885	Cytoplasm	other
P47226	TES	testin LIM domain protein	-0.891	Plasma Membrane	other
P97825	JPT1	Jupiter microtubule associated homolog 1	-0.895	Nucleus	other
P33174	KIF4A	kinesin family member 4A	-0.895	Nucleus	other
O89086	RBM3	RNA binding motif protein 3	-0.895	Cytoplasm	other
Q8VBZ3	CLPTM1	CLPTM1, transmembrane protein	-0.906	Plasma Membrane	other
Q9D2V7	CORO7/CORO7-PAM16	coronin 7	-0.908	Cytoplasm	other
P99024	TUBB	tubulin beta class I	-0.909	Cytoplasm	other
Q58A65	SPAG9	sperm associated antigen 9	-0.911	Cytoplasm	other
O88487	Dync1i2	dynein cytoplasmic 1 intermediate chain 2	-0.917	Cytoplasm	other
Q8R3V5	SH3GLB2	SH3 domain containing GRB2 like, endophilin B2	-0.918	Cytoplasm	other
Q9R1X4	TIMELESS	timeless circadian regulator	-0.921	Nucleus	other
Q9CQV4	RETREG3	reticulophagy regulator family member 3	-0.926	Other	other
Q91WM2	HDHD5	haloacid dehalogenase like hydrolase domain containing 5	-0.943	Cytoplasm	other
Q8BT07	CEP55	centrosomal protein 55	-0.951	Cytoplasm	other
Q9D7A6	SRP19	signal recognition particle 19	-0.954	Cytoplasm	other
O89100	GRAP2	GRB2-related adaptor protein 2	-0.962	Cytoplasm	other
Q8K1X1	WDR11	WD repeat domain 11	-0.966	Cytoplasm	other
Q99N87	MRPS5	mitochondrial ribosomal protein S5	-0.98	Cytoplasm	other
Q01730	RSU1	Ras suppressor protein 1	-0.983	Cytoplasm	other
Q9CQ80	VPS25	vacuolar protein sorting 25 homolog	-0.984	Cytoplasm	other
Q9QZ23	NFU1	NFU1 iron-sulfur cluster scaffold	-1.013	Cytoplasm	other
P01901	HLA-A	major histocompatibility complex, class I, A	-1.022	Plasma Membrane	other
Q99LP6	GRPEL1	GrpE like 1, mitochondrial	-1.035	Cytoplasm	other
Q8R1G6	PDLIM2	PDZ and LIM domain 2	-1.039	Cytoplasm	other
P55194	SH3BP1	SH3 domain binding protein 1	-1.039	Plasma Membrane	other
P01899	HLA-A	major histocompatibility complex, class I, A	-1.043	Plasma Membrane	other
Q6PDI5	KIAA0368	KIAA0368	-1.061	Cytoplasm	other
Q8BKT7	THOC5	THO complex 5	-1.071	Cytoplasm	other
Q8CHI8	EP400	E1A binding protein p400	-1.094	Nucleus	other
Q8R5C5	ACTR1B	ARP1 actin related protein 1 homolog B	-1.101	Cytoplasm	other
Q91YM4	TBRG4	transforming growth factor beta regulator 4	-1.187	Cytoplasm	other
Q91YH5	ATL3	atlastin GTPase 3	-1.2	Cytoplasm	other
Q9WUM4	CORO1C	coronin 1C	-1.203	Cytoplasm	other
Q91VC9	GHITM	growth hormone inducible transmembrane protein	-1.222	Cytoplasm	other
Q9R0P5	DSTN	destrin, actin depolymerizing factor	-1.233	Cytoplasm	other
P46062	SIPA1	signal-induced proliferation-associated 1	-1.253	Cytoplasm	other
Q9QWF0	CHAF1A	chromatin assembly factor 1 subunit A	-1.255	Nucleus	other
Q8BH58	TIPRL	TOR signaling pathway regulator	-1.255	Cytoplasm	other
O54692	ZW10	zw10 kinetochore protein	-1.259	Nucleus	other
Q9JKW0	ARL6IP1	ADP ribosylation factor like GTPase 6 interacting protein 1	-1.273	Cytoplasm	other
Q8BGW0	THEMIS	thymocyte selection associated	-1.282	Cytoplasm	other
Q9CYR0	SSBP1	single stranded DNA binding protein 1	-1.287	Cytoplasm	other
Q9DB29	IAH1	isoamyl acetate hydrolyzing esterase 1 (putative)	-1.339	Cytoplasm	other
Q61823	PDCD4	programmed cell death 4	-1.359	Nucleus	other
Q9CQ01			-1.36	other	other
Q8CI95	OSBPL11	oxysterol binding protein like 11	-1.395	Cytoplasm	other
Q5SUQ9	CTC1	CST telomere replication complex component 1	-1.41	Nucleus	other
P10922	H1F0	H1 histone family member 0	-1.412	Nucleus	other
P01831	THY1	Thy-1 cell surface antigen	-1.442	Plasma Membrane	other
Q6PAR5	GAPVD1	GTPase activating protein and VPS9 domains 1	-1.448	Cytoplasm	other
Q9CQK7	RWDD1	RWD domain containing 1	-1.462	Cytoplasm	other
O08573	LGALS9B	galectin 9B	-1.496	Cytoplasm	other
Q9CZA6	NDE1	nudE neurodevelopment protein 1	-1.532	Nucleus	other
A6H6A9	RABGAP1L	RAB GTPase activating protein 1 like	-1.537	Cytoplasm	other
Q9CPR7	SIKE1	suppressor of IKBKE 1	-1.559	Cytoplasm	other
Q9D8S9	BOLA1	bolA family member 1	-1.576	Cytoplasm	other
Q3UW53	FAM129A	family with sequence similarity 129 member A	-1.646	Cytoplasm	other
Q6PR54	RIF1	replication timing regulatory factor 1	-1.666	Nucleus	other
Q3UMU9	HDGFL2	HDGF like 2	-1.702	Nucleus	other
Q8CCB4	VPS53	VPS53, GARP complex subunit	-1.708	Cytoplasm	other
Q3UVK0	ERMP1	endoplasmic reticulum metallopeptidase 1	-1.709	Cytoplasm	other
Q9CXV9	DCUN1D5	defective in cullin neddylation 1 domain containing 5	-1.717	Other	other
P51943	CCNA2	cyclin A2	-1.723	Nucleus	other
Q3TCH7	CUL4A	cullin 4A	-1.728	Nucleus	other
Q9D8Y0	EFHD2	EF-hand domain family member D2	-1.744	Other	other
Q8K0Y7	PAXX	PAXX, non-homologous end joining factor	-1.746	Cytoplasm	other
Q9Z0Y1	DCTN3	dynactin subunit 3	-1.749	Nucleus	other
Q9DC16	ERGIC1	endoplasmic reticulum-golgi intermediate compartment 1	-1.78	Cytoplasm	other
Q61733	MRPS31	mitochondrial ribosomal protein S31	-1.781	Cytoplasm	other
Q6PGF7	EXOC8	exocyst complex component 8	-1.785	Plasma Membrane	other
Q8VCF0	MAVS	mitochondrial antiviral signaling protein	-1.824	Cytoplasm	other
A3KMP2	TTC38	tetratricopeptide repeat domain 38	-1.829	Cytoplasm	other
Q9Z2H7	GIPC2	GIPC PDZ domain containing family member 2	-1.831	Cytoplasm	other
Q2TPA8	Hsdl2	hydroxysteroid dehydrogenase like 2	-1.839	Cytoplasm	other
Q6P9P6	KIF11	kinesin family member 11	-1.846	Nucleus	other
O54974	LGALS7/LGALS7B	galectin 7	-1.878	Extracellular Space	other
P15379	CD44	CD44 molecule (Indian blood group)	-1.88	Plasma Membrane	other
Q3TPE9	ANKMY2	ankyrin repeat and MYND domain containing 2	-1.887	Plasma Membrane	other
Q6P9L6	KIF15	kinesin family member 15	-1.9	Nucleus	other
Q9D945	LLPH	LLP homolog, long-term synaptic facilitation	-1.91	Extracellular Space	other
P70248	MYO1F	myosin IF	-1.991	Cytoplasm	other
A2A6Q5	CDC27	cell division cycle 27	-1.997	Nucleus	other
Q9JJ11	TACC3	transforming acidic coiled-coil containing protein 3	-2.044	Nucleus	other
Q9CR59	GADD45GIP1	GADD45G interacting protein 1	-2.049	Nucleus	other
Q8CJ53	TRIP10	thyroid hormone receptor interactor 10	-2.05	Cytoplasm	other
P63254	CRIP1	cysteine rich protein 1	-2.073	Cytoplasm	other
Q99ME2	WDR6	WD repeat domain 6	-2.076	Cytoplasm	other
Q8BHA3	DTD2	D-tyrosyl-tRNA deacylase 2 (putative)	-2.085	Other	other
Q9QX11	CYTH1	cytohesin 1	-2.099	Cytoplasm	other
Q9CQY1	ATG12	autophagy related 12	-2.106	Cytoplasm	other
Q9JJU8	SH3BGRL	SH3 domain binding glutamate rich protein like	-2.116	Cytoplasm	other
Q8BX17	GEMIN5	gem nuclear organelle associated protein 5	-2.118	Nucleus	other
Q8BGB2	TTC7A	tetratricopeptide repeat domain 7A	-2.136	Plasma Membrane	other
P20152	VIM	vimentin	-2.167	Cytoplasm	other
Q99K95	RTFDC1	replication termination factor 2 domain containing 1	-2.169	Other	other
Q8K305	NSL1	NSL1, MIS12 kinetochore complex component	-2.186	Nucleus	other
P33215	NEDD1	neural precursor cell expressed, developmentally down-regulated 1	-2.187	Cytoplasm	other
Q3URS9	CCDC51	coiled-coil domain containing 51	-2.201	Cytoplasm	other
Q3UHD6	SNX27	sorting nexin family member 27	-2.266	Cytoplasm	other
Q922S8	KIF2C	kinesin family member 2C	-2.278	Nucleus	other
Q99LE1	RILPL2	Rab interacting lysosomal protein like 2	-2.28	Cytoplasm	other
O55101	SYNGR2	synaptogyrin 2	-2.286	Cytoplasm	other
Q9D083	SPC24	SPC24, NDC80 kinetochore complex component	-2.301	Cytoplasm	other
Q6P9Q4	Fhod1	formin homology 2 domain containing 1	-2.33	Cytoplasm	other
P50543	S100a11	S100 calcium binding protein A11	-2.34	Cytoplasm	other
Q9D7A8	ARMC1	armadillo repeat containing 1	-2.352	Cytoplasm	other
Q9D8Z2	TRIAP1	TP53 regulated inhibitor of apoptosis 1	-2.352	Cytoplasm	other
Q80US4	ACTR5	ARP5 actin related protein 5 homolog	-2.354	Nucleus	other
Q0GNC1	INF2	inverted formin, FH2 and WH2 domain containing	-2.369	Cytoplasm	other
O35144	TERF2	telomeric repeat binding factor 2	-2.384	Nucleus	other
P10404			-2.401	other	other
Q8CIV8	TBCE	tubulin folding cofactor E	-2.44	Cytoplasm	other
Q9Z2E9	BSCL2	BSCL2, seipin lipid droplet biogenesis associated	-2.45	Cytoplasm	other
Q9CQU5	ZWINT	ZW10 interacting kinetochore protein	-2.482	Nucleus	other
Q91VY6	CYTIP	cytohesin 1 interacting protein	-2.499	Cytoplasm	other
Q9DCV4	RMDN1	regulator of microtubule dynamics 1	-2.524	Cytoplasm	other
Q08481	PECAM1	platelet and endothelial cell adhesion molecule 1	-2.525	Plasma Membrane	other
Q99KN1	ARRDC1	arrestin domain containing 1	-2.565	Cytoplasm	other
Q91WA6	SHARPIN	SHANK associated RH domain interactor	-2.608	Plasma Membrane	other
Q4FZC9	SYNE3	spectrin repeat containing nuclear envelope family member 3	-2.626	Nucleus	other
Q9CRD0	OCIAD1	OCIA domain containing 1	-2.632	Cytoplasm	other
Q9JIQ3	DIABLO	diablo IAP-binding mitochondrial protein	-2.659	Cytoplasm	other
Q924L1	LETMD1	LETM1 domain containing 1	-2.662	Plasma Membrane	other
P19246	NEFH	neurofilament heavy	-2.707	Cytoplasm	other
Q9CQT7	DESI1	desumoylating isopeptidase 1	-2.748	Other	other
Q7TQ95	LNPK	lunapark, ER junction formation factor	-2.751	Cytoplasm	other
Q60766	Irgm1	immunity-related GTPase family M member 1	-2.757	Cytoplasm	other
P81117	NUCB2	nucleobindin 2	-2.763	Nucleus	other
Q99PN3	TRIM26	tripartite motif containing 26	-2.793	Cytoplasm	other
Q9JJK2	LANCL2	LanC like 2	-2.808	Plasma Membrane	other
O88396	GRPEL2	GrpE like 2, mitochondrial	-2.844	Cytoplasm	other
Q80ZK0	MRPS10	mitochondrial ribosomal protein S10	-2.862	Cytoplasm	other
Q9WUU8	TNIP1	TNFAIP3 interacting protein 1	-2.872	Nucleus	other
Q8R480	NUP85	nucleoporin 85	-2.939	Cytoplasm	other
Q8CD10	MICU2	mitochondrial calcium uptake 2	-2.945	Cytoplasm	other
Q5EBH1	RASSF5	Ras association domain family member 5	-2.967	Plasma Membrane	other
Q91YY4	ATPAF2	ATP synthase mitochondrial F1 complex assembly factor 2	-3.018	Cytoplasm	other
Q3UKC1	TAX1BP1	Tax1 binding protein 1	-3.048	Cytoplasm	other
Q7TMB8	CYFIP1	cytoplasmic FMR1 interacting protein 1	-3.074	Cytoplasm	other
P07091	S100A4	S100 calcium binding protein A4	-3.093	Cytoplasm	other
Q8K368	FANCI	Fanconi anemia complementation group I	-3.14	Nucleus	other
Q9D7E3	OVCA2	OVCA2, serine hydrolase domain containing	-3.213	Cytoplasm	other
Q05186	RCN1	reticulocalbin 1	-3.263	Cytoplasm	other
Q811I0	ATPAF1	ATP synthase mitochondrial F1 complex assembly factor 1	-3.274	Cytoplasm	other
Q8BZN6	DOCK10	dedicator of cytokinesis 10	-3.276	Cytoplasm	other
P14429	HLA-A	major histocompatibility complex, class I, A	-3.322	Plasma Membrane	other
Q3UH60	DIP2B	disco interacting protein 2 homolog B	-3.368	Cytoplasm	other
Q78YY6	DNAJC15	DnaJ heat shock protein family (Hsp40) member C15	-3.374	Cytoplasm	other
Q9JM90	STAP1	signal transducing adaptor family member 1	-3.381	Cytoplasm	other
Q99PP6	TRIM6-TRIM34	TRIM6-TRIM34 readthrough	-3.419	Cytoplasm	other
Q9CYZ6	REX1BD	required for excision 1-B domain containing	-3.425	Other	other
Q8VDI7	UBAC1	UBA domain containing 1	-3.448	Nucleus	other
Q9CQ89	CUTA	cutA divalent cation tolerance homolog	-3.451	Cytoplasm	other
Q9DBS2	TPRG1L	tumor protein p63 regulated 1 like	-3.491	Cytoplasm	other
P59326	YTHDF1	YTH N6-methyladenosine RNA binding protein 1	-3.499	Other	other
Q9Z0N2	Eif2s3y	eukaryotic translation initiation factor 2, subunit 3, structural gene Y-linked	-3.508	Other	other
Q91WB4	PLEKHF2	pleckstrin homology and FYVE domain containing 2	-3.545	Cytoplasm	other
Q9D8T2	GSDMD	gasdermin D	-3.563	Extracellular Space	other
O70201	BIRC5	baculoviral IAP repeat containing 5	-3.575	Cytoplasm	other
Q9JI13	UTP3	UTP3, small subunit processome component	-3.606	Nucleus	other
Q8BUK6	HOOK3	hook microtubule tethering protein 3	-3.614	Cytoplasm	other
Q3TAS6	EMC10	ER membrane protein complex subunit 10	-3.667	Cytoplasm	other
Q922H9	ZNF330	zinc finger protein 330	-3.716	Nucleus	other
Q7TS74	CKAP2L	cytoskeleton associated protein 2 like	-3.735	Cytoplasm	other
Q69ZK0	PREX1	phosphatidylinositol-3,4,5-trisphosphate dependent Rac exchange factor 1	-3.807	Cytoplasm	other
Q99J79	DDB2	damage specific DNA binding protein 2	-3.839	Nucleus	other
P35762	CD81	CD81 molecule	-3.89	Plasma Membrane	other
Q3UZA1	RCSD1	RCSD domain containing 1	-3.914	Other	other
Q8C0P5	CORO2A	coronin 2A	-3.96	Cytoplasm	other
Q9Z2G6	SEL1L	SEL1L ERAD E3 ligase adaptor subunit	-3.963	Cytoplasm	other
P70271	PDLIM4	PDZ and LIM domain 4	-4.044	Plasma Membrane	other
Q8R1Z9	RNF121	ring finger protein 121	-4.092	Other	other
A2APB8	TPX2	TPX2, microtubule nucleation factor	-4.118	Nucleus	other
Q9DB26	PHYHD1	phytanoyl-CoA dioxygenase domain containing 1	-4.204	Other	other
Q3UA16	SPC25	SPC25, NDC80 kinetochore complex component	-4.207	Cytoplasm	other
P60603	ROMO1	reactive oxygen species modulator 1	-4.225	Cytoplasm	other
P97492	RGS14	regulator of G protein signaling 14	-4.248	Cytoplasm	other
Q60952	CEP250	centrosomal protein 250	-4.275	Nucleus	other
P14430	H2-Q8	histocompatibility 2, Q region locus 8	-4.291	Plasma Membrane	other
Q3V300	KIF22	kinesin family member 22	-4.295	Nucleus	other
Q9DAW9	CNN3	calponin 3	-4.353	Cytoplasm	other
Q6P9N1	FAM126A	family with sequence similarity 126 member A	-4.426	Cytoplasm	other
Q80WC7	AGFG2	ArfGAP with FG repeats 2	-4.452	Other	other
P16110	LGALS3	galectin 3	-4.473	Extracellular Space	other
Q9JMH9	MYO18A	myosin XVIIIA	-4.573	Cytoplasm	other
Q3UFK8	FRMD8	FERM domain containing 8	-5	Other	other
P84244			-5.001	other	other
O70566	Diaph2	diaphanous related formin 2	-5.047	Cytoplasm	other
P57016	LAD1	ladinin 1	-5.074	Extracellular Space	other
Q8VCH5	RABEPK	Rab9 effector protein with kelch motifs	-5.153	Cytoplasm	other
Q9EQF4	IZUMO1R	IZUMO1 receptor, JUNO	-5.284	Plasma Membrane	other
Q9JL25	RGS1	regulator of G protein signaling 1	-5.295	Plasma Membrane	other
Q921N7	TMEM70	transmembrane protein 70	-5.343	Cytoplasm	other
Q8BYN5	FSD1L	fibronectin type III and SPRY domain containing 1 like	-5.611	Other	other
Q9CQ19	MYL9	myosin light chain 9	-5.674	Cytoplasm	other
Q9ERH4	NUSAP1	nucleolar and spindle associated protein 1	-5.679	Nucleus	other
Q80SU7			-5.682	other	other
Q810Q5	C15orf48	chromosome 15 open reading frame 48	-6.69	Nucleus	other
Q60677	ITGAE	integrin subunit alpha E	-7.804	Plasma Membrane	other
P57725	SAMSN1	SAM domain, SH3 domain and nuclear localization signals 1	-7.995	Nucleus	other
Q60604	SCIN	scinderin	-8.548	Cytoplasm	other
P51450	RORC	RAR related orphan receptor C	4.62	Nucleus	ligand-dependent nuclear receptor
P30561	AHR	aryl hydrocarbon receptor	4.171	Nucleus	ligand-dependent nuclear receptor
P06537	NR3C1	nuclear receptor subfamily 3 group C member 1	-2.143	Nucleus	ligand-dependent nuclear receptor
Q64516	Gk	glycerol kinase	5.668	Cytoplasm	kinase
Q62137	JAK3	Janus kinase 3	5.247	Cytoplasm	kinase
Q6PF93	PIK3C3	phosphatidylinositol 3-kinase catalytic subunit type 3	5.006	Cytoplasm	kinase
Q7JJ13	BRD2	bromodomain containing 2	4.939	Nucleus	kinase
Q9WV85	NME3	NME/NM23 nucleoside diphosphate kinase 3	3.431	Cytoplasm	kinase
Q9Z2B9	RPS6KA4	ribosomal protein S6 kinase A4	3.373	Cytoplasm	kinase
Q8CIS0	CARD11	caspase recruitment domain family member 11	3.231	Cytoplasm	kinase
Q9WUI1	MAPK11	mitogen-activated protein kinase 11	3.144	Cytoplasm	kinase
Q80YV4	PANK4	pantothenate kinase 4	3.004	Cytoplasm	kinase
P46414	CDKN1B	cyclin dependent kinase inhibitor 1B	2.653	Nucleus	kinase
P97820	MAP4K4	mitogen-activated protein kinase kinase kinase kinase 4	2.564	Cytoplasm	kinase
Q9DBQ7	SCYL3	SCY1 like pseudokinase 3	2.55	Cytoplasm	kinase
O54781	SRPK2	SRSF protein kinase 2	2.441	Nucleus	kinase
Q62388	ATM	ATM serine/threonine kinase	2.429	Nucleus	kinase
Q9Z0U1	TJP2	tight junction protein 2	2.128	Plasma Membrane	kinase
Q64520	GUK1	guanylate kinase 1	2.064	Cytoplasm	kinase
Q8BYN3	ITPK1	inositol-tetrakisphosphate 1-kinase	2.004	Cytoplasm	kinase
Q9JLB0	MPP6	membrane palmitoylated protein 6	1.853	Plasma Membrane	kinase
Q9ESU6	Brd4	bromodomain containing 4	1.775	Nucleus	kinase
Q9WUR9	AK4	adenylate kinase 4	1.705	Cytoplasm	kinase
Q99LI9	CLP1	cleavage and polyadenylation factor I subunit 1	1.696	Nucleus	kinase
A2ASS6	TTN	titin	1.476	Cytoplasm	kinase
Q62433	NDRG1	N-myc downstream regulated 1	1.458	Nucleus	kinase
P43404	ZAP70	zeta chain of T-cell receptor associated protein kinase 70	1.283	Plasma Membrane	kinase
O08528	HK2	hexokinase 2	1.206	Cytoplasm	kinase
Q60823	AKT2	AKT serine/threonine kinase 2	1.204	Cytoplasm	kinase
P55264	ADK	adenosine kinase	1.087	Nucleus	kinase
Q811D0	DLG1	discs large MAGUK scaffold protein 1	0.949	Plasma Membrane	kinase
O54988	SLK	STE20 like kinase	0.944	Nucleus	kinase
Q922H2	PDK3	pyruvate dehydrogenase kinase 3	0.939	Cytoplasm	kinase
P49615	CDK5	cyclin dependent kinase 5	0.9	Nucleus	kinase
P06240	LCK	LCK proto-oncogene, Src family tyrosine kinase	0.879	Cytoplasm	kinase
P24788	CDK11A	cyclin dependent kinase 11A	0.832	Nucleus	kinase
Q3TZX8	NOL9	nucleolar protein 9	0.78	Nucleus	kinase
Q9QVP9	PTK2B	protein tyrosine kinase 2 beta	0.766	Cytoplasm	kinase
P12382	PFKL	phosphofructokinase, liver type	0.726	Cytoplasm	kinase
Q99J95	CDK9	cyclin dependent kinase 9	0.716	Nucleus	kinase
P56960	EXOSC10	exosome component 10	0.714	Nucleus	kinase
Q61136	PRPF4B	pre-mRNA processing factor 4B	0.712	Nucleus	kinase
Q99PW4	TP53RK	TP53 regulating kinase	0.681	Nucleus	kinase
Q91VJ4	STK38	serine/threonine kinase 38	0.675	Nucleus	kinase
P09411	PGK1	phosphoglycerate kinase 1	0.669	Cytoplasm	kinase
Q5EG47	PRKAA1	protein kinase AMP-activated catalytic subunit alpha 1	0.662	Cytoplasm	kinase
Q8BMS9	RASSF2	Ras association domain family member 2	0.659	Nucleus	kinase
Q8BFZ9	ERLIN2	ER lipid raft associated 2	0.592	Plasma Membrane	kinase
P18654	RPS6KA3	ribosomal protein S6 kinase A3	0.506	Cytoplasm	kinase
Q99PM9	UCK2	uridine-cytidine kinase 2	0.483	Cytoplasm	kinase
Q9DBP5	CMPK1	cytidine/uridine monophosphate kinase 1	0.417	Nucleus	kinase
P15532	NME1	NME/NM23 nucleoside diphosphate kinase 1	0.414	Cytoplasm	kinase
Q2NL51	GSK3A	glycogen synthase kinase 3 alpha	0.391	Nucleus	kinase
O35099	MAP3K5	mitogen-activated protein kinase kinase kinase 5	0.39	Cytoplasm	kinase
Q91XU3	PIP4K2C	phosphatidylinositol-5-phosphate 4-kinase type 2 gamma	0.383	Cytoplasm	kinase
P52480	PKM	pyruvate kinase M1/2	0.322	Cytoplasm	kinase
Q6PIU9	AAK1	AP2 associated kinase 1	0.282	Cytoplasm	kinase
P63085	MAPK1	mitogen-activated protein kinase 1	0.248	Cytoplasm	kinase
P80314	CCT2	chaperonin containing TCP1 subunit 2	-0.211	Cytoplasm	kinase
Q9Z0P5	TWF2	twinfilin actin binding protein 2	-0.305	Cytoplasm	kinase
P97377	CDK2	cyclin dependent kinase 2	-0.306	Nucleus	kinase
Q64261	CDK6	cyclin dependent kinase 6	-0.316	Nucleus	kinase
Q9WV60	GSK3B	glycogen synthase kinase 3 beta	-0.338	Nucleus	kinase
P11440	CDK1	cyclin dependent kinase 1	-0.367	Nucleus	kinase
Q99MK8	GRK2	G protein-coupled receptor kinase 2	-0.435	Cytoplasm	kinase
P47811	MAPK14	mitogen-activated protein kinase 14	-0.444	Cytoplasm	kinase
Q9D7G0	PRPS1	phosphoribosyl pyrophosphate synthetase 1	-0.452	Cytoplasm	kinase
Q8BFP9	PDK1	pyruvate dehydrogenase kinase 1	-0.522	Cytoplasm	kinase
O88673	DGKA	diacylglycerol kinase alpha	-0.561	Cytoplasm	kinase
Q9DBC7	PRKAR1A	protein kinase cAMP-dependent type I regulatory subunit alpha	-0.604	Cytoplasm	kinase
P68181	PRKACB	protein kinase cAMP-activated catalytic subunit beta	-0.664	Cytoplasm	kinase
O70172	PIP4K2A	phosphatidylinositol-5-phosphate 4-kinase type 2 alpha	-0.699	Cytoplasm	kinase
P05132	PRKACA	protein kinase cAMP-activated catalytic subunit alpha	-0.7	Cytoplasm	kinase
O70551	SRPK1	SRSF protein kinase 1	-0.719	Nucleus	kinase
P68404	PRKCB	protein kinase C beta	-0.757	Cytoplasm	kinase
P83741	WNK1	WNK lysine deficient protein kinase 1	-0.764	Cytoplasm	kinase
O88522	IKBKG	inhibitor of nuclear factor kappa B kinase subunit gamma	-0.794	Nucleus	kinase
Q8BG48	STK17B	serine/threonine kinase 17b	-0.838	Nucleus	kinase
O88351	IKBKB	inhibitor of nuclear factor kappa B kinase subunit beta	-0.859	Cytoplasm	kinase
Q8BT60	CPNE3	copine 3	-0.875	Cytoplasm	kinase
Q9WTP6	AK2	adenylate kinase 2	-0.915	Cytoplasm	kinase
Q8VDL4	ADPGK	ADP dependent glucokinase	-0.93	Plasma Membrane	kinase
Q6PHZ2	CAMK2D	calcium/calmodulin dependent protein kinase II delta	-0.963	Cytoplasm	kinase
P23298	PRKCH	protein kinase C eta	-1.002	Cytoplasm	kinase
Q9ES74	NEK7	NIMA related kinase 7	-1.088	Nucleus	kinase
Q63844	MAPK3	mitogen-activated protein kinase 3	-1.114	Cytoplasm	kinase
P97930	DTYMK	deoxythymidylate kinase	-1.191	Cytoplasm	kinase
Q9JKK8	ATR	ATR serine/threonine kinase	-1.242	Nucleus	kinase
Q80X41	VRK1	vaccinia related kinase 1	-1.311	Nucleus	kinase
Q8BZ03	PRKD2	protein kinase D2	-1.323	Cytoplasm	kinase
Q9Z110	ALDH18A1	aldehyde dehydrogenase 18 family member A1	-1.349	Cytoplasm	kinase
P70218	MAP4K1	mitogen-activated protein kinase kinase kinase kinase 1	-1.35	Cytoplasm	kinase
P30285	CDK4	cyclin dependent kinase 4	-1.526	Nucleus	kinase
P70290	MPP1	membrane palmitoylated protein 1	-1.562	Plasma Membrane	kinase
Q80UP3	DGKZ	diacylglycerol kinase zeta	-1.614	Cytoplasm	kinase
Q04447	CKB	creatine kinase B	-1.62	Cytoplasm	kinase
Q9D1G2	PMVK	phosphomevalonate kinase	-1.627	Cytoplasm	kinase
Q3UUV5	SKAP1	src kinase associated phosphoprotein 1	-1.765	Cytoplasm	kinase
Q9D404	OXSM	3-oxoacyl-ACP synthase, mitochondrial	-2.631	Cytoplasm	kinase
P61025	CKS1B	CDC28 protein kinase regulatory subunit 1B	-2.702	Other	kinase
Q9Z1W9	STK39	serine/threonine kinase 39	-2.885	Nucleus	kinase
P20444	PRKCA	protein kinase C alpha	-3.363	Cytoplasm	kinase
P97477	AURKA	aurora kinase A	-3.719	Nucleus	kinase
Q68FF6	GIT1	GIT ArfGAP 1	-3.825	Nucleus	kinase
Q61644	PACSIN1	protein kinase C and casein kinase substrate in neurons 1	-3.913	Cytoplasm	kinase
Q8BH04	PCK2	phosphoenolpyruvate carboxykinase 2, mitochondrial	-3.943	Cytoplasm	kinase
Q8BN21	VRK2	vaccinia related kinase 2	-4.274	Nucleus	kinase
Q91WG8	GNE	glucosamine (UDP-N-acetyl)-2-epimerase/N-acetylmannosamine kinase	-5.045	Cytoplasm	kinase
P24860	CCNB1	cyclin B1	-5.248	Cytoplasm	kinase
P97465	DOK1	docking protein 1	-5.273	Plasma Membrane	kinase
Q07832	PLK1	polo like kinase 1	-5.809	Nucleus	kinase
P04184	TK1	thymidine kinase 1	-5.918	Cytoplasm	kinase
Q9QX60	DGUOK	deoxyguanosine kinase	-6.392	Cytoplasm	kinase
Q6WVG3	KCTD12	potassium channel tetramerization domain containing 12	5.249	Plasma Membrane	ion channel
P70302	STIM1	stromal interaction molecule 1	2.383	Plasma Membrane	ion channel
Q60790	RASA3	RAS p21 protein activator 3	1.848	Plasma Membrane	ion channel
Q9Z1Q5	CLIC1	chloride intracellular channel 1	0.311	Nucleus	ion channel
Q07076	ANXA7	annexin A7	0.229	Plasma Membrane	ion channel
Q60930	VDAC2	voltage dependent anion channel 2	-0.319	Cytoplasm	ion channel
P62482	KCNAB2	potassium voltage-gated channel subfamily A regulatory beta subunit 2	-0.481	Plasma Membrane	ion channel
Q921L3	TMCO1	transmembrane and coiled-coil domains 1	-0.652	Cytoplasm	ion channel
P14824	ANXA6	annexin A6	-0.671	Plasma Membrane	ion channel
Q9WTR1	TRPV2	transient receptor potential cation channel subfamily V member 2	-0.863	Plasma Membrane	ion channel
Q3UMR5	MCU	mitochondrial calcium uniporter	-1.637	Cytoplasm	ion channel
Q9ERL7	GMFG	glia maturation factor gamma	0.71	Cytoplasm	growth factor
P51859	HDGF	heparin binding growth factor	0.249	Extracellular Space	growth factor
Q9CQI3	GMFB	glia maturation factor beta	-0.331	Cytoplasm	growth factor
P04202	TGFB1	transforming growth factor beta 1	-2.038	Extracellular Space	growth factor
Q9CQ45	NENF	neudesin neurotrophic factor	-3.341	Extracellular Space	growth factor
Q9Z0M6	ADGRE5	adhesion G protein-coupled receptor E5	-1.714	Plasma Membrane	G-protein coupled receptor
Q4VBD2	TAPT1	transmembrane anterior posterior transformation 1	-3.064	Plasma Membrane	G-protein coupled receptor
Q9WVK0	AGTRAP	angiotensin II receptor associated protein	-3.292	Plasma Membrane	G-protein coupled receptor
P47774	CCR7	C-C motif chemokine receptor 7	-3.605	Plasma Membrane	G-protein coupled receptor
P21981	TGM2	transglutaminase 2	6.581	Cytoplasm	enzyme
P08905	LYZ	lysozyme	6.331	Extracellular Space	enzyme
Q8CG03	PDE5A	phosphodiesterase 5A	5.962	Cytoplasm	enzyme
Q91ZS8	ADARB1	adenosine deaminase, RNA specific B1	5.107	Nucleus	enzyme
Q61387	COX7A2L	cytochrome c oxidase subunit 7A2 like	4.972	Cytoplasm	enzyme
Q9Z2A7	DGAT1	diacylglycerol O-acyltransferase 1	4.827	Cytoplasm	enzyme
Q60596	XRCC1	X-ray repair cross complementing 1	4.73	Nucleus	enzyme
P10649	GSTM5	glutathione S-transferase mu 5	4.722	Cytoplasm	enzyme
Q9D9V3	ECHDC1	ethylmalonyl-CoA decarboxylase 1	4.46	Cytoplasm	enzyme
Q9DC70	NDUFS7	NADH:ubiquinone oxidoreductase core subunit S7	4.289	Cytoplasm	enzyme
Q9DB85	RRP8	ribosomal RNA processing 8	4.28	Nucleus	enzyme
Q8BIP0	DARS2	aspartyl-tRNA synthetase 2, mitochondrial	4.253	Cytoplasm	enzyme
Q3TX08	TRMT1	tRNA methyltransferase 1	4.223	Extracellular Space	enzyme
O88508	DNMT3A	DNA methyltransferase 3 alpha	4.177	Nucleus	enzyme
Q6PB93	GALNT2	polypeptide N-acetylgalactosaminyltransferase 2	4.052	Cytoplasm	enzyme
P03899	MT-ND3	NADH dehydrogenase, subunit 3 (complex I)	3.946	Cytoplasm	enzyme
Q01514	GBP3	guanylate binding protein 3	3.67	Cytoplasm	enzyme
P11247	MPO	myeloperoxidase	3.635	Cytoplasm	enzyme
Q5SVQ0	KAT7	lysine acetyltransferase 7	3.614	Nucleus	enzyme
Q80V26	IMPAD1	inositol monophosphatase domain containing 1	3.59	Cytoplasm	enzyme
Q7TSQ8	PDPR	pyruvate dehydrogenase phosphatase regulatory subunit	3.533	Cytoplasm	enzyme
Q8BTJ4	ENPP4	ectonucleotide pyrophosphatase/phosphodiesterase 4	3.494	Cytoplasm	enzyme
Q9CPX8	UQCR11	ubiquinol-cytochrome c reductase, complex III subunit XI	3.318	Cytoplasm	enzyme
Q9Z1P6	NDUFA7	NADH:ubiquinone oxidoreductase subunit A7	3.273	Cytoplasm	enzyme
Q7TMF3	NDUFA12	NADH:ubiquinone oxidoreductase subunit A12	3.239	Cytoplasm	enzyme
Q8CJ19	MICAL3	microtubule associated monooxygenase, calponin and LIM domain containing 3	3.175	Cytoplasm	enzyme
Q9ERI6	RDH14	retinol dehydrogenase 14 (all-trans/9-cis/11-cis)	3.142	Cytoplasm	enzyme
O54788	DFFB	DNA fragmentation factor subunit beta	3.121	Nucleus	enzyme
O35448	PPT2	palmitoyl-protein thioesterase 2	3.1	Cytoplasm	enzyme
A6H5Y3	MTR	5-methyltetrahydrofolate-homocysteine methyltransferase	3.063	Cytoplasm	enzyme
O54786	DFFA	DNA fragmentation factor subunit alpha	3.007	Nucleus	enzyme
Q8CF89	TAB1	TGF-beta activated kinase 1 (MAP3K7) binding protein 1	2.994	Cytoplasm	enzyme
Q8BUB6	UST	uronyl 2-sulfotransferase	2.989	Cytoplasm	enzyme
O35134	POLR1A	RNA polymerase I subunit A	2.976	Nucleus	enzyme
Q8C0S1	DIS3L	DIS3 like exosome 3'-5' exoribonuclease	2.896	Cytoplasm	enzyme
Q922E4	PCYT2	phosphate cytidylyltransferase 2, ethanolamine	2.886	Cytoplasm	enzyme
P03921	MT-ND5	NADH dehydrogenase, subunit 5 (complex I)	2.834	Cytoplasm	enzyme
Q9DBX6	CYP2S1	cytochrome P450 family 2 subfamily S member 1	2.774	Cytoplasm	enzyme
Q9CQG2	METTL16	methyltransferase like 16	2.764	Nucleus	enzyme
Q9CQ26	STAMBP	STAM binding protein	2.763	Nucleus	enzyme
P36552	CPOX	coproporphyrinogen oxidase	2.73	Cytoplasm	enzyme
Q6TEK5	VKORC1L1	vitamin K epoxide reductase complex subunit 1 like 1	2.682	Cytoplasm	enzyme
P17047	LAMP2	lysosomal associated membrane protein 2	2.663	Plasma Membrane	enzyme
Q5SU73	COIL	coilin	2.651	Nucleus	enzyme
Q60967	PAPSS1	3'-phosphoadenosine 5'-phosphosulfate synthase 1	2.638	Cytoplasm	enzyme
Q8CG50	RAB43	RAB43, member RAS oncogene family	2.638	Cytoplasm	enzyme
P70699	GAA	glucosidase alpha, acid	2.63	Cytoplasm	enzyme
P97868	RBBP6	RB binding protein 6, ubiquitin ligase	2.617	Nucleus	enzyme
Q921N6	DDX27	DEAD-box helicase 27	2.613	Nucleus	enzyme
Q9CPU0	GLO1	glyoxalase I	2.534	Cytoplasm	enzyme
Q9R112	SQOR	sulfide quinone oxidoreductase	2.534	Cytoplasm	enzyme
Q3U319	RNF40	ring finger protein 40	2.463	Cytoplasm	enzyme
Q9CXR1	DHRS7	dehydrogenase/reductase 7	2.435	Other	enzyme
Q6PCM2	INTS6	integrator complex subunit 6	2.374	Nucleus	enzyme
Q6R891	PPP1R9B	protein phosphatase 1 regulatory subunit 9B	2.302	Cytoplasm	enzyme
P17439	GBA	glucosylceramidase beta	2.29	Cytoplasm	enzyme
Q3TTA7	CBLB	Cbl proto-oncogene B	2.285	Nucleus	enzyme
P00158	MT-CYB	cytochrome b	2.285	Cytoplasm	enzyme
Q6PAT0	ADAT3	adenosine deaminase, tRNA specific 3	2.268	Nucleus	enzyme
Q6NVG1	LPCAT4	lysophosphatidylcholine acyltransferase 4	2.267	Cytoplasm	enzyme
O55057	PDE6D	phosphodiesterase 6D	2.226	Cytoplasm	enzyme
Q8K3J1	NDUFS8	NADH:ubiquinone oxidoreductase core subunit S8	2.186	Cytoplasm	enzyme
Q8R123	FLAD1	flavin adenine dinucleotide synthetase 1	2.178	Cytoplasm	enzyme
Q62425	NDUFA4	NDUFA4, mitochondrial complex associated	2.163	Cytoplasm	enzyme
P48771	COX7A2	cytochrome c oxidase subunit 7A2	2.157	Cytoplasm	enzyme
Q9CR56	NKIRAS2	NFKB inhibitor interacting Ras like 2	2.112	Cytoplasm	enzyme
Q9EQ20	ALDH6A1	aldehyde dehydrogenase 6 family member A1	2.059	Cytoplasm	enzyme
Q8BJ37	TDP1	tyrosyl-DNA phosphodiesterase 1	2.04	Nucleus	enzyme
Q9D8S4	REXO2	RNA exonuclease 2	1.973	Cytoplasm	enzyme
Q8R2K1	FUOM	fucose mutarotase	1.962	Cytoplasm	enzyme
Q9QUR7	PIN1	peptidylprolyl cis/trans isomerase, NIMA-interacting 1	1.961	Nucleus	enzyme
Q9CPQ1	Cox6c	cytochrome c oxidase subunit VIc	1.891	Cytoplasm	enzyme
P12265	GUSB	glucuronidase beta	1.866	Cytoplasm	enzyme
P52503	NDUFS6	NADH:ubiquinone oxidoreductase subunit S6	1.828	Cytoplasm	enzyme
Q9DBB4	NAA16	N(alpha)-acetyltransferase 16, NatA auxiliary subunit	1.822	Nucleus	enzyme
Q9QZ82	CYP11A1	cytochrome P450 family 11 subfamily A member 1	1.817	Cytoplasm	enzyme
P56393	COX7B	cytochrome c oxidase subunit 7B	1.802	Cytoplasm	enzyme
Q99LJ1	FUCA1	alpha-L-fucosidase 1	1.794	Cytoplasm	enzyme
O35215	DDT	D-dopachrome tautomerase	1.791	Cytoplasm	enzyme
Q9D855	UQCRB	ubiquinol-cytochrome c reductase binding protein	1.774	Cytoplasm	enzyme
P03958	ADA	adenosine deaminase	1.757	Cytoplasm	enzyme
Q8BH61	F13A1	coagulation factor XIII A chain	1.745	Extracellular Space	enzyme
Q71RI9	KYAT3	kynurenine aminotransferase 3	1.737	Cytoplasm	enzyme
P97346	NXN	nucleoredoxin	1.735	Nucleus	enzyme
P45700	MAN1A1	mannosidase alpha class 1A member 1	1.707	Cytoplasm	enzyme
B8ZXI1	QTRT2	queuine tRNA-ribosyltransferase accessory subunit 2	1.689	Cytoplasm	enzyme
Q8CAA7	PGM2L1	phosphoglucomutase 2 like 1	1.662	Cytoplasm	enzyme
Q9WUP4	SRD5A3	steroid 5 alpha-reductase 3	1.645	Cytoplasm	enzyme
P11103	PARP1	poly(ADP-ribose) polymerase 1	1.631	Nucleus	enzyme
O08749	DLD	dihydrolipoamide dehydrogenase	1.627	Cytoplasm	enzyme
Q91WD5	NDUFS2	NADH:ubiquinone oxidoreductase core subunit S2	1.626	Cytoplasm	enzyme
O88958	GNPDA1	glucosamine-6-phosphate deaminase 1	1.604	Cytoplasm	enzyme
Q91W78	USB1	U6 snRNA biogenesis phosphodiesterase 1	1.583	Nucleus	enzyme
Q921I9	EXOSC4	exosome component 4	1.571	Nucleus	enzyme
Q8K0C4	CYP51A1	cytochrome P450 family 51 subfamily A member 1	1.569	Cytoplasm	enzyme
Q9CR61	NDUFB7	NADH:ubiquinone oxidoreductase subunit B7	1.553	Cytoplasm	enzyme
P29391	FTL	ferritin light chain	1.546	Cytoplasm	enzyme
Q99JT9	ADI1	acireductone dioxygenase 1	1.536	Nucleus	enzyme
Q64511	TOP2B	DNA topoisomerase II beta	1.526	Nucleus	enzyme
Q91VD9	NDUFS1	NADH:ubiquinone oxidoreductase core subunit S1	1.513	Cytoplasm	enzyme
Q9D964	GATM	glycine amidinotransferase	1.485	Cytoplasm	enzyme
Q3UIU2	NDUFB6	NADH:ubiquinone oxidoreductase subunit B6	1.453	Cytoplasm	enzyme
P38060	HMGCL	3-hydroxymethyl-3-methylglutaryl-CoA lyase	1.429	Cytoplasm	enzyme
Q9QXG2	CHM	CHM, Rab escort protein 1	1.414	Cytoplasm	enzyme
Q9QUH0	GLRX	glutaredoxin	1.4	Cytoplasm	enzyme
Q99ME9	GTPBP4	GTP binding protein 4	1.396	Nucleus	enzyme
Q9CXZ1	NDUFS4	NADH:ubiquinone oxidoreductase subunit S4	1.396	Cytoplasm	enzyme
P50295	NAT1	N-acetyltransferase 1	1.395	Cytoplasm	enzyme
O35405	PLD3	phospholipase D family member 3	1.395	Cytoplasm	enzyme
Q8CEC6	PPWD1	peptidylprolyl isomerase domain and WD repeat containing 1	1.335	Nucleus	enzyme
Q9CQ54	NDUFC2	NADH:ubiquinone oxidoreductase subunit C2	1.285	Cytoplasm	enzyme
P16125	LDHB	lactate dehydrogenase B	1.284	Cytoplasm	enzyme
Q61107	GBP4	guanylate binding protein 4	1.265	Cytoplasm	enzyme
P36536	SAR1A	secretion associated Ras related GTPase 1A	1.264	Cytoplasm	enzyme
Q9D6J6	NDUFV2	NADH:ubiquinone oxidoreductase core subunit V2	1.22	Cytoplasm	enzyme
Q9CQZ5	NDUFA6	NADH:ubiquinone oxidoreductase subunit A6	1.209	Cytoplasm	enzyme
Q923G2	POLR2H	RNA polymerase II subunit H	1.202	Nucleus	enzyme
Q9ERS2	NDUFA13	NADH:ubiquinone oxidoreductase subunit A13	1.191	Cytoplasm	enzyme
Q689Z5	SBNO1	strawberry notch homolog 1	1.172	Other	enzyme
Q9D0D4	DIMT1	DIM1 dimethyladenosine transferase 1 homolog	1.159	Cytoplasm	enzyme
Q6ZPJ3	UBE2O	ubiquitin conjugating enzyme E2 O	1.156	Nucleus	enzyme
Q9CWX9	DDX47	DEAD-box helicase 47	1.137	Nucleus	enzyme
Q9CQ75	NDUFA2	NADH:ubiquinone oxidoreductase subunit A2	1.131	Cytoplasm	enzyme
Q9EQQ9	MGEA5	meningioma expressed antigen 5 (hyaluronidase)	1.128	Cytoplasm	enzyme
Q9DCT2	NDUFS3	NADH:ubiquinone oxidoreductase core subunit S3	1.124	Cytoplasm	enzyme
P52760	RIDA	reactive intermediate imine deaminase A homolog	1.123	Cytoplasm	enzyme
P52432	POLR1C	RNA polymerase I subunit C	1.122	Nucleus	enzyme
Q8VEJ4	NLE1	notchless homolog 1	1.064	Nucleus	enzyme
Q8R1I1	UQCR10	ubiquinol-cytochrome c reductase, complex III subunit X	1.063	Cytoplasm	enzyme
Q9CQ91	NDUFA3	NADH:ubiquinone oxidoreductase subunit A3	1.058	Cytoplasm	enzyme
Q8BYB9	POGLUT1	protein O-glucosyltransferase 1	1.056	Extracellular Space	enzyme
P47791	GSR	glutathione-disulfide reductase	1.039	Cytoplasm	enzyme
Q9CQ40	MRPL49	mitochondrial ribosomal protein L49	1.036	Cytoplasm	enzyme
P00405	MT-CO2	cytochrome c oxidase subunit II	1.031	Cytoplasm	enzyme
Q91YT0	NDUFV1	NADH:ubiquinone oxidoreductase core subunit V1	1.03	Cytoplasm	enzyme
Q9EQP2	EHD4	EH domain containing 4	1.012	Plasma Membrane	enzyme
Q99J99	MPST	mercaptopyruvate sulfurtransferase	0.993	Cytoplasm	enzyme
O88796	RPP30	ribonuclease P/MRP subunit p30	0.991	Nucleus	enzyme
P28271	ACO1	aconitase 1	0.988	Cytoplasm	enzyme
Q91V01	LPCAT3	lysophosphatidylcholine acyltransferase 3	0.955	Plasma Membrane	enzyme
Q9CPP6	NDUFA5	NADH:ubiquinone oxidoreductase subunit A5	0.953	Cytoplasm	enzyme
Q9DC69	NDUFA9	NADH:ubiquinone oxidoreductase subunit A9	0.953	Cytoplasm	enzyme
Q9CPU2	NDUFB2	NADH:ubiquinone oxidoreductase subunit B2	0.951	Cytoplasm	enzyme
P03911	MT-ND4	NADH dehydrogenase, subunit 4 (complex I)	0.931	Cytoplasm	enzyme
P28352	APEX1	apurinic/apyrimidinic endodeoxyribonuclease 1	0.921	Nucleus	enzyme
Q9CQJ8	NDUFB9	NADH:ubiquinone oxidoreductase subunit B9	0.901	Cytoplasm	enzyme
P62071	RRAS2	RAS related 2	0.892	Plasma Membrane	enzyme
Q9D8B4	NDUFA11	NADH:ubiquinone oxidoreductase subunit A11	0.891	Cytoplasm	enzyme
Q9DAR7	DCPS	decapping enzyme, scavenger	0.879	Nucleus	enzyme
A2A4P0	DHX8	DEAH-box helicase 8	0.87	Nucleus	enzyme
Q9CZW4	ACSL3	acyl-CoA synthetase long chain family member 3	0.864	Cytoplasm	enzyme
P70697	UROD	uroporphyrinogen decarboxylase	0.864	Cytoplasm	enzyme
P56391	COX6B1	cytochrome c oxidase subunit 6B1	0.858	Cytoplasm	enzyme
Q99KK2	CMAS	cytidine monophosphate N-acetylneuraminic acid synthetase	0.855	Nucleus	enzyme
Q8JZK9	HMGCS1	3-hydroxy-3-methylglutaryl-CoA synthase 1	0.847	Cytoplasm	enzyme
Q99K70	RRAGC	Ras related GTP binding C	0.838	Cytoplasm	enzyme
Q9CQW2	ARL8B	ADP ribosylation factor like GTPase 8B	0.824	Plasma Membrane	enzyme
Q9D2E2	TOE1	target of EGR1, exonuclease	0.818	Nucleus	enzyme
P70303	CTPS2	CTP synthase 2	0.813	Cytoplasm	enzyme
O88712	CTBP1	C-terminal binding protein 1	0.809	Nucleus	enzyme
P56376	ACYP1	acylphosphatase 1	0.804	Cytoplasm	enzyme
Q9WU56	PUS1	pseudouridylate synthase 1	0.781	Nucleus	enzyme
Q9DCC4	PYCR3	pyrroline-5-carboxylate reductase 3	0.781	Cytoplasm	enzyme
O35130	EMG1	EMG1, N1-specific pseudouridine methyltransferase	0.779	Nucleus	enzyme
P00397	MT-CO1	cytochrome c oxidase subunit I	0.77	Cytoplasm	enzyme
Q6PHN9	RAB35	RAB35, member RAS oncogene family	0.761	Cytoplasm	enzyme
Q9JIK5	DDX21	DExD-box helicase 21	0.755	Nucleus	enzyme
Q60710	SAMHD1	SAM and HD domain containing deoxynucleoside triphosphate triphosphohydrolase 1	0.746	Nucleus	enzyme
P35550	FBL	fibrillarin	0.745	Nucleus	enzyme
Q9CQR4	ACOT13	acyl-CoA thioesterase 13	0.741	Cytoplasm	enzyme
Q80TP3	UBR5	ubiquitin protein ligase E3 component n-recognin 5	0.74	Nucleus	enzyme
P84084	ARF5	ADP ribosylation factor 5	0.727	Cytoplasm	enzyme
Q9CQ69	UQCRQ	ubiquinol-cytochrome c reductase complex III subunit VII	0.724	Cytoplasm	enzyme
Q60715	P4HA1	prolyl 4-hydroxylase subunit alpha 1	0.72	Cytoplasm	enzyme
Q80VI1	TRIM56	tripartite motif containing 56	0.705	Cytoplasm	enzyme
Q61207	PSAP	prosaposin	0.699	Extracellular Space	enzyme
Q8BVQ5	PPME1	protein phosphatase methylesterase 1	0.696	Nucleus	enzyme
Q8BGX0	TRIM23	tripartite motif containing 23	0.693	Nucleus	enzyme
Q7TSV4	PGM2	phosphoglucomutase 2	0.677	Cytoplasm	enzyme
Q61183	PAPOLA	poly(A) polymerase alpha	0.675	Nucleus	enzyme
Q4FZF3	DDX49	DEAD-box helicase 49	0.674	Nucleus	enzyme
Q569Z5	DDX46	DEAD-box helicase 46	0.64	Nucleus	enzyme
P23475	XRCC6	X-ray repair cross complementing 6	0.633	Nucleus	enzyme
Q9DB77	UQCRC2	ubiquinol-cytochrome c reductase core protein 2	0.628	Cytoplasm	enzyme
Q6PGG2	GMIP	GEM interacting protein	0.625	Cytoplasm	enzyme
Q9DC51	GNAI3	G protein subunit alpha i3	0.624	Cytoplasm	enzyme
Q9CR16	PPID	peptidylprolyl isomerase D	0.621	Cytoplasm	enzyme
P63017	HSPA8	heat shock protein family A (Hsp70) member 8	0.607	Cytoplasm	enzyme
Q93092	TALDO1	transaldolase 1	0.605	Cytoplasm	enzyme
Q91V92	ACLY	ATP citrate lyase	0.598	Cytoplasm	enzyme
Q99JI6	RAP1B	RAP1B, member of RAS oncogene family	0.593	Cytoplasm	enzyme
Q3U186	RARS2	arginyl-tRNA synthetase 2, mitochondrial	0.589	Cytoplasm	enzyme
Q6DFW4	NOP58	NOP58 ribonucleoprotein	0.584	Nucleus	enzyme
Q61656	DDX5	DEAD-box helicase 5	0.582	Nucleus	enzyme
Q02053	UBA1	ubiquitin like modifier activating enzyme 1	0.576	Cytoplasm	enzyme
Q5DTM8	RNF20	ring finger protein 20	0.57	Nucleus	enzyme
Q9D0G0	MRPS30	mitochondrial ribosomal protein S30	0.569	Cytoplasm	enzyme
Q9CZ13	UQCRC1	ubiquinol-cytochrome c reductase core protein 1	0.568	Cytoplasm	enzyme
P55258	RAB8A	RAB8A, member RAS oncogene family	0.566	Plasma Membrane	enzyme
Q61578	FDXR	ferredoxin reductase	0.565	Cytoplasm	enzyme
P27046	MAN2A1	mannosidase alpha class 2A member 1	0.559	Cytoplasm	enzyme
Q9QY06	MYO9B	myosin IXB	0.545	Cytoplasm	enzyme
Q8R0X7	SGPL1	sphingosine-1-phosphate lyase 1	0.515	Cytoplasm	enzyme
Q99KR7	PPIF	peptidylprolyl isomerase F	0.514	Cytoplasm	enzyme
P27641	XRCC5	X-ray repair cross complementing 5	0.51	Nucleus	enzyme
Q9JHI7	EXOSC9	exosome component 9	0.505	Nucleus	enzyme
Q06138	CAB39	calcium binding protein 39	0.498	Cytoplasm	enzyme
P35700	PRDX1	peroxiredoxin 1	0.491	Cytoplasm	enzyme
Q922R8	PDIA6	protein disulfide isomerase family A member 6	0.488	Cytoplasm	enzyme
P12787	COX5A	cytochrome c oxidase subunit 5A	0.48	Cytoplasm	enzyme
Q8BX09	RBBP5	RB binding protein 5, histone lysine methyltransferase complex subunit	0.48	Nucleus	enzyme
P61082	UBE2M	ubiquitin conjugating enzyme E2 M	0.479	Cytoplasm	enzyme
Q9EPK2	RP2	RP2, ARL3 GTPase activating protein	0.472	Cytoplasm	enzyme
Q5SUR0	PFAS	phosphoribosylformylglycinamidine synthase	0.47	Cytoplasm	enzyme
Q91W50	CSDE1	cold shock domain containing E1	0.468	Cytoplasm	enzyme
P29595	NEDD8	neural precursor cell expressed, developmentally down-regulated 8	0.466	Nucleus	enzyme
P49717	MCM4	minichromosome maintenance complex component 4	0.453	Nucleus	enzyme
Q8K224	NAT10	N-acetyltransferase 10	0.452	Nucleus	enzyme
Q9R0M6	RAB9A	RAB9A, member RAS oncogene family	0.451	Cytoplasm	enzyme
Q6NVF4	HELB	DNA helicase B	0.442	Nucleus	enzyme
P14152	MDH1	malate dehydrogenase 1	0.431	Cytoplasm	enzyme
Q8BH69	SEPHS1	selenophosphate synthetase 1	0.426	Other	enzyme
P27601	GNA13	G protein subunit alpha 13	0.425	Plasma Membrane	enzyme
Q7TQK4	EXOSC3	exosome component 3	0.424	Nucleus	enzyme
Q9EPU0	UPF1	UPF1, RNA helicase and ATPase	0.42	Nucleus	enzyme
Q922Q1	2002-03-01	mitochondrial amidoxime reducing component 2	0.416	Cytoplasm	enzyme
Q9Z2M7	PMM2	phosphomannomutase 2	0.409	Cytoplasm	enzyme
P33609	POLA1	DNA polymerase alpha 1, catalytic subunit	0.407	Nucleus	enzyme
P24270	CAT	catalase	0.406	Cytoplasm	enzyme
P50247	AHCY	adenosylhomocysteinase	0.403	Cytoplasm	enzyme
Q8CIG8	PRMT5	protein arginine methyltransferase 5	0.403	Cytoplasm	enzyme
P08030	APRT	adenine phosphoribosyltransferase	0.396	Cytoplasm	enzyme
Q9CSH3	DIS3	DIS3 homolog, exosome endoribonuclease and 3'-5' exoribonuclease	0.396	Nucleus	enzyme
Q3TSG4	ALKBH5	alkB homolog 5, RNA demethylase	0.389	Nucleus	enzyme
P20060	HEXB	hexosaminidase subunit beta	0.381	Cytoplasm	enzyme
P05063	ALDOC	aldolase, fructose-bisphosphate C	0.38	Cytoplasm	enzyme
Q9D0M0	EXOSC7	exosome component 7	0.378	Nucleus	enzyme
Q9D0L8	RNMT	RNA guanine-7 methyltransferase	0.377	Nucleus	enzyme
P49718	MCM5	minichromosome maintenance complex component 5	0.375	Nucleus	enzyme
Q922D8	MTHFD1	methylenetetrahydrofolate dehydrogenase, cyclohydrolase and formyltetrahydrofolate synthetase 1	0.371	Cytoplasm	enzyme
Q3U9G9	LBR	lamin B receptor	0.37	Nucleus	enzyme
Q80UW8	POLR2E	RNA polymerase II subunit E	0.37	Nucleus	enzyme
Q8VDW0	DDX39A	DExD-box helicase 39A	0.365	Nucleus	enzyme
P62908	RPS3	ribosomal protein S3	0.362	Cytoplasm	enzyme
Q91VC3	EIF4A3	eukaryotic translation initiation factor 4A3	0.355	Nucleus	enzyme
Q9CR68	UQCRFS1	ubiquinol-cytochrome c reductase, Rieske iron-sulfur polypeptide 1	0.354	Cytoplasm	enzyme
P17751	TPI1	triosephosphate isomerase 1	0.351	Cytoplasm	enzyme
Q9ESX5	DKC1	dyskerin pseudouridine synthase 1	0.345	Nucleus	enzyme
Q9D1Q4	DPM3	dolichyl-phosphate mannosyltransferase subunit 3	0.342	Cytoplasm	enzyme
P84096	RHOG	ras homolog family member G	0.336	Cytoplasm	enzyme
P06151	LDHA	lactate dehydrogenase A	0.332	Cytoplasm	enzyme
Q9DCJ5	NDUFA8	NADH:ubiquinone oxidoreductase subunit A8	0.328	Cytoplasm	enzyme
Q8BZ98	DNM3	dynamin 3	0.32	Cytoplasm	enzyme
Q8CDN6	TXNL1	thioredoxin like 1	0.32	Cytoplasm	enzyme
Q99KP6	PRPF19	pre-mRNA processing factor 19	0.315	Nucleus	enzyme
P09671	SOD2	superoxide dismutase 2	0.312	Cytoplasm	enzyme
Q9D2M8	UBE2V2	ubiquitin conjugating enzyme E2 V2	0.311	Cytoplasm	enzyme
P61089	UBE2N	ubiquitin conjugating enzyme E2 N	0.307	Cytoplasm	enzyme
Q9Z1N5	DDX39B	DExD-box helicase 39B	0.304	Nucleus	enzyme
P46638	RAB11B	RAB11B, member RAS oncogene family	0.3	Cytoplasm	enzyme
Q922J9	FAR1	fatty acyl-CoA reductase 1	0.298	Cytoplasm	enzyme
Q91V41	RAB14	RAB14, member RAS oncogene family	0.298	Cytoplasm	enzyme
P45952	ACADM	acyl-CoA dehydrogenase medium chain	0.297	Cytoplasm	enzyme
Q64433	HSPE1	heat shock protein family E (Hsp10) member 1	0.29	Cytoplasm	enzyme
P20108	PRDX3	peroxiredoxin 3	0.288	Cytoplasm	enzyme
P61957	SUMO2	small ubiquitin-like modifier 2	0.283	Nucleus	enzyme
P26883	FKBP1A	FK506 binding protein 1A	0.28	Cytoplasm	enzyme
Q9CQM5	TXNDC17	thioredoxin domain containing 17	0.277	Cytoplasm	enzyme
P30416	FKBP4	FK506 binding protein 4	0.273	Nucleus	enzyme
Q9Z2I9	SUCLA2	succinate-CoA ligase ADP-forming beta subunit	0.273	Cytoplasm	enzyme
O08810	EFTUD2	elongation factor Tu GTP binding domain containing 2	0.268	Nucleus	enzyme
Q9QXK7	CPSF3	cleavage and polyadenylation specific factor 3	0.265	Nucleus	enzyme
P58281	OPA1	OPA1, mitochondrial dynamin like GTPase	0.265	Cytoplasm	enzyme
Q9JLJ2	ALDH9A1	aldehyde dehydrogenase 9 family member A1	0.257	Cytoplasm	enzyme
Q3THS6	MAT2A	methionine adenosyltransferase 2A	0.252	Cytoplasm	enzyme
P25206	MCM3	minichromosome maintenance complex component 3	0.247	Nucleus	enzyme
Q9ERU9	RGPD4 (includes others)	RANBP2-like and GRIP domain containing 5	0.247	Nucleus	enzyme
P97310	MCM2	minichromosome maintenance complex component 2	0.244	Nucleus	enzyme
Q501J6	DDX17	DEAD-box helicase 17	0.241	Nucleus	enzyme
P05064	ALDOA	aldolase, fructose-bisphosphate A	0.238	Cytoplasm	enzyme
P09103	P4HB	prolyl 4-hydroxylase subunit beta	0.235	Cytoplasm	enzyme
Q3U0V1	KHSRP	KH-type splicing regulatory protein	0.23	Nucleus	enzyme
Q05144	RAC2	Rac family small GTPase 2	0.224	Cytoplasm	enzyme
P17225	PTBP1	polypyrimidine tract binding protein 1	0.218	Nucleus	enzyme
Q9D2G2	DLST	dihydrolipoamide S-succinyltransferase	0.217	Cytoplasm	enzyme
Q9QUI0	RHOA	ras homolog family member A	0.215	Cytoplasm	enzyme
Q9D8E6	RPL4	ribosomal protein L4	0.215	Cytoplasm	enzyme
Q8CFI7	POLR2B	RNA polymerase II subunit B	0.211	Nucleus	enzyme
P07901	HSP90AA1	heat shock protein 90 alpha family class A member 1	0.205	Cytoplasm	enzyme
Q1HFZ0	NSUN2	NOP2/Sun RNA methyltransferase family member 2	0.203	Nucleus	enzyme
P46978	STT3A	STT3A, catalytic subunit of the oligosaccharyltransferase complex	0.195	Plasma Membrane	enzyme
Q61881	MCM7	minichromosome maintenance complex component 7	0.19	Nucleus	enzyme
Q9R0Q7	PTGES3	prostaglandin E synthase 3	0.189	Cytoplasm	enzyme
O08795	PRKCSH	protein kinase C substrate 80K-H	0.188	Cytoplasm	enzyme
Q6P4T2	SNRNP200	small nuclear ribonucleoprotein U5 subunit 200	0.185	Nucleus	enzyme
Q9CWJ9	ATIC	5-aminoimidazole-4-carboxamide ribonucleotide formyltransferase/IMP cyclohydrolase	0.172	Cytoplasm	enzyme
Q60972	RBBP4	RB binding protein 4, chromatin remodeling factor	0.162	Nucleus	enzyme
P08752	GNAI2	G protein subunit alpha i2	0.148	Plasma Membrane	enzyme
P05202	GOT2	glutamic-oxaloacetic transaminase 2	0.147	Cytoplasm	enzyme
Q922B2	DARS	aspartyl-tRNA synthetase	-0.147	Cytoplasm	enzyme
P97807	FH	fumarate hydratase	-0.149	Cytoplasm	enzyme
Q920E5	FDPS	farnesyl diphosphate synthase	-0.156	Cytoplasm	enzyme
Q62446	FKBP3	FK506 binding protein 3	-0.161	Nucleus	enzyme
P40142	TKT	transketolase	-0.186	Cytoplasm	enzyme
P63101	YWHAZ	tyrosine 3-monooxygenase/tryptophan 5-monooxygenase activation protein zeta	-0.187	Cytoplasm	enzyme
P17918	PCNA	proliferating cell nuclear antigen	-0.195	Nucleus	enzyme
Q922Q4	PYCR2	pyrroline-5-carboxylate reductase 2	-0.198	Cytoplasm	enzyme
P50544	ACADVL	acyl-CoA dehydrogenase very long chain	-0.201	Cytoplasm	enzyme
P39054	DNM2	dynamin 2	-0.203	Plasma Membrane	enzyme
P50431	SHMT1	serine hydroxymethyltransferase 1	-0.204	Cytoplasm	enzyme
Q78PY7	SND1	staphylococcal nuclease and tudor domain containing 1	-0.208	Nucleus	enzyme
P42208	2002-09-01	septin 2	-0.213	Cytoplasm	enzyme
P17182	ENO1	enolase 1	-0.219	Cytoplasm	enzyme
P08249	MDH2	malate dehydrogenase 2	-0.238	Cytoplasm	enzyme
Q9CQM9	GLRX3	glutaredoxin 3	-0.244	Cytoplasm	enzyme
Q99KE1	ME2	malic enzyme 2	-0.256	Cytoplasm	enzyme
P19096	FASN	fatty acid synthase	-0.262	Cytoplasm	enzyme
Q9DBG6	RPN2	ribophorin II	-0.263	Cytoplasm	enzyme
Q7TQI3	Otub1	OTU domain, ubiquitin aldehyde binding 1	-0.265	Cytoplasm	enzyme
P62880	GNB2	G protein subunit beta 2	-0.271	Plasma Membrane	enzyme
P54822	ADSL	adenylosuccinate lyase	-0.275	Cytoplasm	enzyme
Q99MN1	KARS	lysyl-tRNA synthetase	-0.285	Cytoplasm	enzyme
Q9JHW2	NIT2	nitrilase family member 2	-0.285	Cytoplasm	enzyme
P54823	DDX6	DEAD-box helicase 6	-0.286	Nucleus	enzyme
P43247	MSH2	mutS homolog 2	-0.294	Nucleus	enzyme
Q60605	MYL6	myosin light chain 6	-0.294	Cytoplasm	enzyme
Q91Z53	GRHPR	glyoxylate and hydroxypyruvate reductase	-0.296	Cytoplasm	enzyme
Q9R1T2	SAE1	SUMO1 activating enzyme subunit 1	-0.313	Cytoplasm	enzyme
Q99020	HNRNPAB	heterogeneous nuclear ribonucleoprotein A/B	-0.315	Nucleus	enzyme
Q9D0R2	TARS	threonyl-tRNA synthetase	-0.324	Nucleus	enzyme
Q99MN9	PCCB	propionyl-CoA carboxylase beta subunit	-0.334	Cytoplasm	enzyme
Q8BU30	IARS	isoleucyl-tRNA synthetase	-0.34	Cytoplasm	enzyme
Q9Z0E6	GBP2	guanylate binding protein 2	-0.341	Cytoplasm	enzyme
Q9D819	PPA1	pyrophosphatase (inorganic) 1	-0.341	Cytoplasm	enzyme
P56394	COX17	COX17, cytochrome c oxidase copper chaperone	-0.345	Cytoplasm	enzyme
Q9QYJ0	DNAJA2	DnaJ heat shock protein family (Hsp40) member A2	-0.347	Nucleus	enzyme
O70152	DPM1	dolichyl-phosphate mannosyltransferase subunit 1, catalytic	-0.351	Cytoplasm	enzyme
P06745	GPI	glucose-6-phosphate isomerase	-0.359	Extracellular Space	enzyme
Q9DCX2	ATP5H	ATP synthase, H+ transporting, mitochondrial Fo complex subunit D	-0.363	Cytoplasm	enzyme
Q91VR5	DDX1	DEAD-box helicase 1	-0.366	Nucleus	enzyme
P37040	POR	cytochrome p450 oxidoreductase	-0.366	Cytoplasm	enzyme
Q99LF4	RTCB	RNA 2',3'-cyclic phosphate and 5'-OH ligase	-0.37	Cytoplasm	enzyme
Q8BP47	NARS	asparaginyl-tRNA synthetase	-0.374	Cytoplasm	enzyme
Q91WQ3	YARS	tyrosyl-tRNA synthetase	-0.381	Cytoplasm	enzyme
Q3UX10	TUBAL3	tubulin alpha like 3	-0.382	Other	enzyme
Q9DCL9	PAICS	phosphoribosylaminoimidazole carboxylase and phosphoribosylaminoimidazolesuccinocarboxamide synthase	-0.385	Cytoplasm	enzyme
Q6P5E4	UGGT1	UDP-glucose glycoprotein glucosyltransferase 1	-0.392	Cytoplasm	enzyme
Q61941	Nnt	nicotinamide nucleotide transhydrogenase	-0.394	Cytoplasm	enzyme
P53994	RAB2A	RAB2A, member RAS oncogene family	-0.398	Cytoplasm	enzyme
Q9CQ65	MTAP	methylthioadenosine phosphorylase	-0.401	Nucleus	enzyme
P26443	GLUD1	glutamate dehydrogenase 1	-0.406	Cytoplasm	enzyme
Q8VDD5	MYH9	myosin heavy chain 9	-0.419	Cytoplasm	enzyme
Q8K2B3	SDHA	succinate dehydrogenase complex flavoprotein subunit A	-0.424	Cytoplasm	enzyme
P00493	HPRT1	hypoxanthine phosphoribosyltransferase 1	-0.429	Cytoplasm	enzyme
O08553	DPYSL2	dihydropyrimidinase like 2	-0.43	Cytoplasm	enzyme
Q9CZU6	CS	citrate synthase	-0.436	Cytoplasm	enzyme
Q9R0X4	ACOT9	acyl-CoA thioesterase 9	-0.441	Cytoplasm	enzyme
Q8BMJ2	LARS	leucyl-tRNA synthetase	-0.441	Cytoplasm	enzyme
P42209	2001-09-01	septin 1	-0.451	Cytoplasm	enzyme
Q8QZS1	HIBCH	3-hydroxyisobutyryl-CoA hydrolase	-0.453	Cytoplasm	enzyme
Q9D710	TMX2	thioredoxin related transmembrane protein 2	-0.455	Other	enzyme
Q8C0C7	FARSA	phenylalanyl-tRNA synthetase alpha subunit	-0.459	Cytoplasm	enzyme
P35282	RAB21	RAB21, member RAS oncogene family	-0.464	Cytoplasm	enzyme
Q8BH95	ECHS1	enoyl-CoA hydratase, short chain 1	-0.471	Cytoplasm	enzyme
P24527	LTA4H	leukotriene A4 hydrolase	-0.471	Cytoplasm	enzyme
Q5SWU9	ACACA	acetyl-CoA carboxylase alpha	-0.472	Cytoplasm	enzyme
P39749	FEN1	flap structure-specific endonuclease 1	-0.479	Nucleus	enzyme
Q99L43	CDS2	CDP-diacylglycerol synthase 2	-0.481	Cytoplasm	enzyme
P35293	RAB18	RAB18, member RAS oncogene family	-0.483	Cytoplasm	enzyme
P61028	RAB8B	RAB8B, member RAS oncogene family	-0.485	Cytoplasm	enzyme
O88455	DHCR7	7-dehydrocholesterol reductase	-0.491	Cytoplasm	enzyme
Q61205	PAFAH1B3	platelet activating factor acetylhydrolase 1b catalytic subunit 3	-0.493	Cytoplasm	enzyme
Q9ERI2	RAB27A	RAB27A, member RAS oncogene family	-0.493	Cytoplasm	enzyme
Q921G7	ETFDH	electron transfer flavoprotein dehydrogenase	-0.502	Cytoplasm	enzyme
P63213	GNG2	G protein subunit gamma 2	-0.503	Plasma Membrane	enzyme
P51855	GSS	glutathione synthetase	-0.507	Cytoplasm	enzyme
P35278	RAB5C	RAB5C, member RAS oncogene family	-0.508	Cytoplasm	enzyme
P63038	HSPD1	heat shock protein family D (Hsp60) member 1	-0.512	Cytoplasm	enzyme
P32921	WARS	tryptophanyl-tRNA synthetase	-0.513	Cytoplasm	enzyme
Q9CQ60	PGLS	6-phosphogluconolactonase	-0.514	Cytoplasm	enzyme
B2RQC6	CAD	carbamoyl-phosphate synthetase 2, aspartate transcarbamylase, and dihydroorotase	-0.516	Cytoplasm	enzyme
Q61171	PRDX2	peroxiredoxin 2	-0.518	Cytoplasm	enzyme
P37913	LIG1	DNA ligase 1	-0.525	Nucleus	enzyme
O55125	NIPSNAP1	nipsnap homolog 1	-0.528	Cytoplasm	enzyme
P46664	ADSS	adenylosuccinate synthase	-0.531	Cytoplasm	enzyme
Q9WTX6	CUL1	cullin 1	-0.534	Nucleus	enzyme
P05201	GOT1	glutamic-oxaloacetic transaminase 1	-0.535	Cytoplasm	enzyme
Q6ZPY7	KDM3B	lysine demethylase 3B	-0.538	Nucleus	enzyme
Q8K2C9	HACD3	3-hydroxyacyl-CoA dehydratase 3	-0.548	Cytoplasm	enzyme
Q91W89	MAN2C1	mannosidase alpha class 2C member 1	-0.552	Cytoplasm	enzyme
Q6PD26	PIGS	phosphatidylinositol glycan anchor biosynthesis class S	-0.554	Cytoplasm	enzyme
Q9JK48	SH3GLB1	SH3 domain containing GRB2 like, endophilin B1	-0.571	Cytoplasm	enzyme
P47856	GFPT1	glutamine--fructose-6-phosphate transaminase 1	-0.572	Cytoplasm	enzyme
Q61216	MRE11	MRE11 homolog, double strand break repair nuclease	-0.582	Nucleus	enzyme
P10639	TXN	thioredoxin	-0.587	Cytoplasm	enzyme
P13864	DNMT1	DNA methyltransferase 1	-0.591	Nucleus	enzyme
Q8BXZ1	TMX3	thioredoxin related transmembrane protein 3	-0.602	Cytoplasm	enzyme
P45878	FKBP2	FK506 binding protein 2	-0.604	Cytoplasm	enzyme
Q9WUD1	STUB1	STIP1 homology and U-box containing protein 1	-0.607	Cytoplasm	enzyme
Q62095	DDX3Y	DEAD-box helicase 3, Y-linked	-0.625	Cytoplasm	enzyme
Q91V12	ACOT7	acyl-CoA thioesterase 7	-0.627	Cytoplasm	enzyme
Q8CI94	PYGB	glycogen phosphorylase B	-0.64	Cytoplasm	enzyme
Q6A009	LTN1	listerin E3 ubiquitin protein ligase 1	-0.658	Nucleus	enzyme
Q68FL6	MARS	methionyl-tRNA synthetase	-0.658	Cytoplasm	enzyme
Q80XN0	BDH1	3-hydroxybutyrate dehydrogenase 1	-0.664	Cytoplasm	enzyme
Q9JHK4	RABGGTA	Rab geranylgeranyltransferase alpha subunit	-0.671	Extracellular Space	enzyme
Q01320	TOP2A	DNA topoisomerase II alpha	-0.671	Nucleus	enzyme
Q8BU04	UBR7	ubiquitin protein ligase E3 component n-recognin 7 (putative)	-0.673	Other	enzyme
Q80UG5	2009-09-01	septin 9	-0.674	Cytoplasm	enzyme
G5E870	TRIP12	thyroid hormone receptor interactor 12	-0.675	Cytoplasm	enzyme
Q9QY36	NAA10	N(alpha)-acetyltransferase 10, NatA catalytic subunit	-0.683	Nucleus	enzyme
Q9WUL7	ARL3	ADP ribosylation factor like GTPase 3	-0.702	Cytoplasm	enzyme
Q9WTL7	LYPLA2	lysophospholipase II	-0.714	Cytoplasm	enzyme
Q9CPV4	GLOD4	glyoxalase domain containing 4	-0.731	Cytoplasm	enzyme
Q9CY27	TECR	trans-2,3-enoyl-CoA reductase	-0.735	Plasma Membrane	enzyme
Q8BU33	ILVBL	ilvB acetolactate synthase like	-0.746	Cytoplasm	enzyme
P52825	CPT2	carnitine palmitoyltransferase 2	-0.75	Cytoplasm	enzyme
Q9DBT5	AMPD2	adenosine monophosphate deaminase 2	-0.752	Cytoplasm	enzyme
Q8BG51	RHOT1	ras homolog family member T1	-0.752	Cytoplasm	enzyme
Q60648	GM2A	GM2 ganglioside activator	-0.754	Cytoplasm	enzyme
P97493	TXN2	thioredoxin 2	-0.758	Cytoplasm	enzyme
Q9CZ42	NAXD	NAD(P)HX dehydratase	-0.759	Cytoplasm	enzyme
P24547	IMPDH2	inosine monophosphate dehydrogenase 2	-0.768	Cytoplasm	enzyme
Q5Y5T1	ZDHHC20	zinc finger DHHC-type containing 20	-0.779	Plasma Membrane	enzyme
O35855	BCAT2	branched chain amino acid transaminase 2	-0.795	Cytoplasm	enzyme
Q99L27	GMPR2	guanosine monophosphate reductase 2	-0.796	Cytoplasm	enzyme
Q91W90	TXNDC5	thioredoxin domain containing 5	-0.796	Cytoplasm	enzyme
Q3ULJ0	GPD1L	glycerol-3-phosphate dehydrogenase 1 like	-0.798	Cytoplasm	enzyme
O09005	DEGS1	delta 4-desaturase, sphingolipid 1	-0.816	Plasma Membrane	enzyme
Q9WTI7	MYO1C	myosin IC	-0.818	Cytoplasm	enzyme
Q8R086	SUOX	sulfite oxidase	-0.818	Cytoplasm	enzyme
Q8K4Z3	NAXE	NAD(P)HX epimerase	-0.824	Extracellular Space	enzyme
Q9CYR6	PGM3	phosphoglucomutase 3	-0.835	Cytoplasm	enzyme
Q9Z1Q9	VARS	valyl-tRNA synthetase	-0.847	Cytoplasm	enzyme
O70252	HMOX2	heme oxygenase 2	-0.848	Cytoplasm	enzyme
Q3THG9	AARSD1	alanyl-tRNA synthetase domain containing 1	-0.867	Nucleus	enzyme
Q8JZN7	RHOT2	ras homolog family member T2	-0.867	Cytoplasm	enzyme
P58044	IDI1	isopentenyl-diphosphate delta isomerase 1	-0.871	Cytoplasm	enzyme
P52431	POLD1	DNA polymerase delta 1, catalytic subunit	-0.876	Nucleus	enzyme
Q68FL4	AHCYL2	adenosylhomocysteinase like 2	-0.886	Other	enzyme
Q9D0K2	OXCT1	3-oxoacid CoA-transferase 1	-0.89	Cytoplasm	enzyme
P11157	RRM2	ribonucleotide reductase regulatory subunit M2	-0.899	Nucleus	enzyme
P56395	CYB5A	cytochrome b5 type A	-0.901	Cytoplasm	enzyme
Q8CHK3	MBOAT7	membrane bound O-acyltransferase domain containing 7	-0.902	Plasma Membrane	enzyme
P08003	PDIA4	protein disulfide isomerase family A member 4	-0.904	Cytoplasm	enzyme
Q8BMG7	RAB3GAP2	RAB3 GTPase activating non-catalytic protein subunit 2	-0.904	Cytoplasm	enzyme
Q80TY0	FNBP1	formin binding protein 1	-0.905	Nucleus	enzyme
Q9JLJ5	ELOVL1	ELOVL fatty acid elongase 1	-0.909	Cytoplasm	enzyme
Q8CGY8	OGT	O-linked N-acetylglucosamine (GlcNAc) transferase	-0.909	Cytoplasm	enzyme
Q05920	PC	pyruvate carboxylase	-0.926	Cytoplasm	enzyme
Q61263	SOAT1	sterol O-acyltransferase 1	-0.927	Cytoplasm	enzyme
Q9JLI6	SCLY	selenocysteine lyase	-0.929	Cytoplasm	enzyme
Q91YP3	DERA	deoxyribose-phosphate aldolase	-0.941	Cytoplasm	enzyme
P70245	EBP	emopamil binding protein (sterol isomerase)	-0.965	Cytoplasm	enzyme
P70349	HINT1	histidine triad nucleotide binding protein 1	-0.973	Nucleus	enzyme
Q8BGQ7	AARS	alanyl-tRNA synthetase	-0.975	Cytoplasm	enzyme
Q8BYM8	CARS2	cysteinyl-tRNA synthetase 2, mitochondrial	-0.98	Cytoplasm	enzyme
Q8R2Y8	PTRH2	peptidyl-tRNA hydrolase 2	-1.003	Cytoplasm	enzyme
Q9ET26	RNF114	ring finger protein 114	-1.009	Extracellular Space	enzyme
Q9DCN2	Cyb5r3	cytochrome b5 reductase 3	-1.012	Cytoplasm	enzyme
P10518	ALAD	aminolevulinate dehydratase	-1.021	Cytoplasm	enzyme
Q924M7	MPI	mannose phosphate isomerase	-1.03	Cytoplasm	enzyme
Q9D7H3	RTCA	RNA 3'-terminal phosphate cyclase	-1.045	Nucleus	enzyme
Q61425	HADH	hydroxyacyl-CoA dehydrogenase	-1.055	Cytoplasm	enzyme
Q9D2R0	AACS	acetoacetyl-CoA synthetase	-1.072	Cytoplasm	enzyme
Q99KP3	CRYL1	crystallin lambda 1	-1.082	Cytoplasm	enzyme
O08582	GTPBP1	GTP binding protein 1	-1.09	Cytoplasm	enzyme
Q99KI0	ACO2	aconitase 2	-1.109	Cytoplasm	enzyme
Q91ZJ5	UGP2	UDP-glucose pyrophosphorylase 2	-1.113	Cytoplasm	enzyme
Q9DC50	CROT	carnitine O-octanoyltransferase	-1.115	Cytoplasm	enzyme
Q8BGW1	FTO	FTO, alpha-ketoglutarate dependent dioxygenase	-1.117	Nucleus	enzyme
Q8BUV3	GPHN	gephyrin	-1.137	Plasma Membrane	enzyme
Q9D1C1	UBE2C	ubiquitin conjugating enzyme E2 C	-1.14	Cytoplasm	enzyme
Q8K2D3	EDC3	enhancer of mRNA decapping 3	-1.153	Cytoplasm	enzyme
Q61024	ASNS	asparagine synthetase (glutamine-hydrolyzing)	-1.186	Cytoplasm	enzyme
P23506	Pcmt1	protein-L-isoaspartate (D-aspartate) O-methyltransferase 1	-1.189	Cytoplasm	enzyme
Q9D5T0	ATAD1	ATPase family, AAA domain containing 1	-1.203	Plasma Membrane	enzyme
Q9CQX2	CYB5B	cytochrome b5 type B	-1.207	Cytoplasm	enzyme
Q99K85	PSAT1	phosphoserine aminotransferase 1	-1.208	Cytoplasm	enzyme
Q8BWT1	ACAA2	acetyl-CoA acyltransferase 2	-1.22	Cytoplasm	enzyme
P97355	SMS	spermine synthase	-1.245	Cytoplasm	enzyme
Q8JZR0	ACSL5	acyl-CoA synthetase long chain family member 5	-1.272	Cytoplasm	enzyme
Q8BIJ6	IARS2	isoleucyl-tRNA synthetase 2, mitochondrial	-1.275	Cytoplasm	enzyme
P47738	ALDH2	aldehyde dehydrogenase 2 family (mitochondrial)	-1.277	Cytoplasm	enzyme
Q9CZD3	GARS	glycyl-tRNA synthetase	-1.295	Cytoplasm	enzyme
Q9R1J0	NSDHL	NAD(P) dependent steroid dehydrogenase-like	-1.324	Cytoplasm	enzyme
Q8CAY6	ACAT2	acetyl-CoA acetyltransferase 2	-1.337	Cytoplasm	enzyme
Q3UIR3	DTX3L	deltex E3 ubiquitin ligase 3L	-1.344	Cytoplasm	enzyme
P07607	TYMS	thymidylate synthetase	-1.349	Nucleus	enzyme
Q2EMV9	PARP14	poly(ADP-ribose) polymerase family member 14	-1.361	Cytoplasm	enzyme
Q9CR09	UFC1	ubiquitin-fold modifier conjugating enzyme 1	-1.361	Cytoplasm	enzyme
Q8BFZ6	Idi2	isopentenyl-diphosphate delta isomerase 2	-1.365	Cytoplasm	enzyme
Q9CQ62	DECR1	2,4-dienoyl-CoA reductase 1	-1.376	Cytoplasm	enzyme
Q8BGG7	UBASH3B	ubiquitin associated and SH3 domain containing B	-1.379	Other	enzyme
Q8BIW1	PRUNE1	prune exopolyphosphatase 1	-1.393	Nucleus	enzyme
Q8C522	ENDOD1	endonuclease domain containing 1	-1.429	Extracellular Space	enzyme
Q9JI78	NGLY1	N-glycanase 1	-1.439	Cytoplasm	enzyme
Q9JII6	AKR1A1	aldo-keto reductase family 1 member A1	-1.44	Cytoplasm	enzyme
Q8VDP6	CDIPT	CDP-diacylglycerol--inositol 3-phosphatidyltransferase	-1.457	Cytoplasm	enzyme
Q9ESY9	IFI30	IFI30, lysosomal thiol reductase	-1.477	Cytoplasm	enzyme
P29416	HEXA	hexosaminidase subunit alpha	-1.481	Cytoplasm	enzyme
Q571I9	ALDH16A1	aldehyde dehydrogenase 16 family member A1	-1.498	Cytoplasm	enzyme
Q99PU8	DHX30	DExH-box helicase 30	-1.54	Nucleus	enzyme
Q9QWT9	KIFC1	kinesin family member C1	-1.552	Nucleus	enzyme
Q9JHU9	ISYNA1	inositol-3-phosphate synthase 1	-1.553	Cytoplasm	enzyme
Q8BIG7	COMTD1	catechol-O-methyltransferase domain containing 1	-1.582	Plasma Membrane	enzyme
Q99L13	HIBADH	3-hydroxyisobutyrate dehydrogenase	-1.598	Cytoplasm	enzyme
Q8R4N0	CLYBL	citrate lyase beta like	-1.612	Cytoplasm	enzyme
P70196	TRAF6	TNF receptor associated factor 6	-1.639	Cytoplasm	enzyme
P42125	ECI1	enoyl-CoA delta isomerase 1	-1.723	Cytoplasm	enzyme
O09131	GSTO1	glutathione S-transferase omega 1	-1.73	Cytoplasm	enzyme
Q8BLN5	LSS	lanosterol synthase	-1.782	Cytoplasm	enzyme
Q8BGC4	ZADH2	zinc binding alcohol dehydrogenase domain containing 2	-1.827	Cytoplasm	enzyme
Q3TXU5	DHPS	deoxyhypusine synthase	-1.854	Cytoplasm	enzyme
Q9R0P3	ESD	esterase D	-1.883	Cytoplasm	enzyme
P29758	OAT	ornithine aminotransferase	-1.898	Cytoplasm	enzyme
Q9DC23	DNAJC10	DnaJ heat shock protein family (Hsp40) member C10	-1.926	Cytoplasm	enzyme
Q00519	XDH	xanthine dehydrogenase	-1.934	Cytoplasm	enzyme
Q9JHI5	IVD	isovaleryl-CoA dehydrogenase	-2.02	Cytoplasm	enzyme
Q9JKM7	RAB37	RAB37, member RAS oncogene family	-2.061	Cytoplasm	enzyme
P16460	ASS1	argininosuccinate synthase 1	-2.095	Cytoplasm	enzyme
Q61753	PHGDH	phosphoglycerate dehydrogenase	-2.102	Cytoplasm	enzyme
Q9Z207	DIAPH3	diaphanous related formin 3	-2.129	Cytoplasm	enzyme
Q91XL3	UXS1	UDP-glucuronate decarboxylase 1	-2.153	Cytoplasm	enzyme
O88587	COMT	catechol-O-methyltransferase	-2.188	Cytoplasm	enzyme
Q9ER72	CARS	cysteinyl-tRNA synthetase	-2.208	Cytoplasm	enzyme
P22315	FECH	ferrochelatase	-2.253	Cytoplasm	enzyme
Q8K023	AKR1C3	aldo-keto reductase family 1 member C3	-2.271	Cytoplasm	enzyme
Q8R3F5	MCAT	malonyl-CoA-acyl carrier protein transacylase	-2.282	Cytoplasm	enzyme
P97789	XRN1	5'-3' exoribonuclease 1	-2.403	Cytoplasm	enzyme
Q08297	RAD51	RAD51 recombinase	-2.413	Nucleus	enzyme
Q9EQ06	HSD17B11	hydroxysteroid 17-beta dehydrogenase 11	-2.428	Cytoplasm	enzyme
Q9DCC7	Isoc2b	isochorismatase domain containing 2b	-2.438	Cytoplasm	enzyme
P23249	MOV10	Mov10 RISC complex RNA helicase	-2.476	Nucleus	enzyme
Q59J78	NDUFAF2	NADH:ubiquinone oxidoreductase complex assembly factor 2	-2.515	Cytoplasm	enzyme
P21550	ENO3	enolase 3	-2.579	Cytoplasm	enzyme
Q99LL3	CHST12	carbohydrate sulfotransferase 12	-2.594	Cytoplasm	enzyme
Q3V3E1	UBASH3A	ubiquitin associated and SH3 domain containing A	-2.605	Cytoplasm	enzyme
Q07417	ACADS	acyl-CoA dehydrogenase short chain	-2.615	Cytoplasm	enzyme
Q9DBL1	ACADSB	acyl-CoA dehydrogenase short/branched chain	-2.647	Cytoplasm	enzyme
Q920N2	HLCS	holocarboxylase synthetase	-2.68	Cytoplasm	enzyme
O35459	ECH1	enoyl-CoA hydratase 1	-2.73	Cytoplasm	enzyme
Q8K4F5	ABHD11	abhydrolase domain containing 11	-2.819	Cytoplasm	enzyme
Q9DCS3	MECR	mitochondrial trans-2-enoyl-CoA reductase	-2.831	Cytoplasm	enzyme
Q9Z1E4	GYS1	glycogen synthase 1	-2.849	Cytoplasm	enzyme
Q8BXQ2	PIGT	phosphatidylinositol glycan anchor biosynthesis class T	-2.899	Cytoplasm	enzyme
A2RSY6	TRMT1L	tRNA methyltransferase 1 like	-2.939	Other	enzyme
Q9QWR8	NAGA	alpha-N-acetylgalactosaminidase	-2.979	Cytoplasm	enzyme
Q8VCX1	AKR1D1	aldo-keto reductase family 1 member D1	-3.066	Cytoplasm	enzyme
Q8K358	PIGU	phosphatidylinositol glycan anchor biosynthesis class U	-3.111	Cytoplasm	enzyme
Q9DB25	ALG5	ALG5, dolichyl-phosphate beta-glucosyltransferase	-3.158	Cytoplasm	enzyme
Q7TPH6	MYCBP2	MYC binding protein 2, E3 ubiquitin protein ligase	-3.164	Nucleus	enzyme
P03893	MT-ND2	MTND2	-3.172	Cytoplasm	enzyme
O09111	NDUFB11	NADH:ubiquinone oxidoreductase subunit B11	-3.173	Cytoplasm	enzyme
Q9CRA0	ART4	ADP-ribosyltransferase 4 (Dombrock blood group)	-3.201	Nucleus	enzyme
Q8BH86	DGLUCY	D-glutamate cyclase	-3.22	Cytoplasm	enzyme
Q9JM13	RABGEF1	RAB guanine nucleotide exchange factor 1	-3.228	Cytoplasm	enzyme
P51174	ACADL	acyl-CoA dehydrogenase long chain	-3.237	Cytoplasm	enzyme
Q91XB0	TREX1	three prime repair exonuclease 1	-3.373	Nucleus	enzyme
Q8BHI7	ELOVL5	ELOVL fatty acid elongase 5	-3.447	Cytoplasm	enzyme
P97742	CPT1A	carnitine palmitoyltransferase 1A	-3.559	Cytoplasm	enzyme
P52624	UPP1	uridine phosphorylase 1	-3.617	Cytoplasm	enzyme
Q8CFX1	H6PD	hexose-6-phosphate dehydrogenase/glucose 1-dehydrogenase	-3.631	Cytoplasm	enzyme
P27808	MGAT1	mannosyl (alpha-1,3-)-glycoprotein beta-1,2-N-acetylglucosaminyltransferase	-3.854	Cytoplasm	enzyme
Q8VCR7	ABHD14B	abhydrolase domain containing 14B	-3.892	Cytoplasm	enzyme
Q08642	PADI2	peptidyl arginine deiminase 2	-3.897	Cytoplasm	enzyme
Q9JL16	ISG20	interferon stimulated exonuclease gene 20	-3.945	Nucleus	enzyme
[truncated: 41 more rows]

## Sheet: Fig3b-Th17high
	ID	Description	hits	BgRatio	pvalue	p.adjust	qvalue	geneID	Count
mmu03040	mmu03040	Spliceosome	572	100/1978	4.40166e-10	1.1621e-07	1.1621e-07	U2af2/Pcbp1/Snrpf/Hspa8/Srsf3/Puf60/Prpf38a/Ddx46/Srsf2/Isy1/Srsf1/Hnrnpm/Snu13/LOC100862468/Sf3a3/Eftud2/Lsm2/Snrpa1/Lsm3/Snrpd2/Tra2b/Usp39/Srsf6/Snrpa/Snrpc/Snrnp70/Lsm8/Sf3a1/Eif4a3/Pqbp1/Sf3b3/Prpf3/Ddx39b/Sart1/Dhx8/Alyref/Hnrnpk/Lsm6/Snrpd3/Bud31/Hnrnpu/Prpf19/Ctnnbl1/U2af1/Prpf40a/Hnrnpc/Sf3b6/Snrpe/Phf5a/Cdc5l/Snrnp200/Prpf31/Tcerg1/Prpf8/Zmat2/Prpf4/Prpf38b/Srsf7	58
mmu04932	mmu04932	Non-alcoholic fatty liver disease (NAFLD)	572	80/1978	8.15512e-10	1.1621e-07	1.1621e-07	COX2/Cox7a2/Cox6b1/Ndufb6/Akt2/Ndufa4/Ndufa12/Ndufs8/Uqcr10/Ndufs1/Ndufs2/Ndufv1/Ndufa10/Ndufs5/Ndufa5/Cox6c/Ndufc2/Uqcrq/Ndufa2/Ndufb4/Gm3244/Gm3873/Ndufa6/Ndufb7/Uqcrc1/Ndufv2/Uqcrc2/Ndufa9/Ndufs3/Ndufa13/Map3k5/Ndufs6/Cox7a2l/Uqcr11/Ndufb9/Uqcrfs1/Ndufa7/COX1/Cox7c/Casp7/Ndufs7/Cox5a/Cox7b/Prkaa1/Ndufb2/CYTB/Gsk3a/Ndufa3/Ndufa8	49
mmu00190	mmu00190	Oxidative phosphorylation	572	92/1978	1.32913e-08	1.26267e-06	1.26267e-06	COX2/Cox7a2/Cox6b1/Ndufb6/Ndufa4/Ndufa12/Ndufs8/Uqcr10/Ndufs1/Ndufs2/Ndufv1/Ndufa10/Ndufs5/Ndufa5/Cox6c/Ndufc2/Uqcrq/Ndufa2/Ndufb4/Gm3244/Gm3873/Ndufa6/Ndufb7/Uqcrc1/Ndufv2/Uqcrc2/Ndufa9/Ndufs3/Ndufa13/Ndufs6/Cox7a2l/Uqcr11/Ndufb9/Uqcrfs1/Ndufa7/COX1/ND3/ND4/Cox7c/Atp6v1a/Atp6v1e1/Atp6v0d2/Ndufs7/ND5/Cox5a/Cox7b/Atp6v1d/Ndufb2/CYTB/Ndufa3/Ndufa8/Atp6ap1	52
mmu05012	mmu05012	Parkinson's disease	572	92/1978	4.50193e-08	3.20762e-06	3.20762e-06	COX2/Cox7a2/Cox6b1/Uba1/Ndufb6/Ndufa4/Ndufa12/Ndufs8/Uqcr10/Ndufs1/Ndufs2/Ndufv1/Ndufa10/Ndufs5/Ndufa5/Cox6c/Ndufc2/Uqcrq/Ndufa2/Ndufb4/Gm3244/Gm3873/Ndufa6/Ndufb7/Uqcrc1/Ndufv2/Uqcrc2/Gnai3/Ndufa9/Ndufs3/Ndufa13/Ndufs6/Cox7a2l/Uqcr11/Ndufb9/Uqcrfs1/Ndufa7/COX1/ND3/ND4/Cox7c/Ppif/Ndufs7/ND5/Gnai2/Cox5a/Cox7b/Ndufb2/CYTB/Ndufa3/Ndufa8	51
mmu04723	mmu04723	Retrograde endocannabinoid signaling	572	62/1978	2.88306e-07	1.64334e-05	1.64334e-05	Ndufb6/Ndufa4/Ndufa12/Gng5/Gng5-ps/Ndufs8/Ndufs1/Ndufs2/Ndufv1/Ndufa10/Ndufs5/Ndufa5/Ndufc2/Ndufa2/Ndufb4/Gm3244/Gm3873/Ndufa6/Ndufb7/Ndufv2/Gnai3/Ndufa9/Ndufs3/Ndufa13/Mapk11/Ndufs6/Ndufb9/Ndufa7/ND3/ND4/Ndufs7/ND5/Gnai2/Mapk1/Ndufb2/Ndufa3/Ndufa8	37
mmu05010	mmu05010	Alzheimer's disease	572	96/1978	6.5021e-06	0.00030885	0.00030885	COX2/Cox7a2/Cox6b1/Ndufb6/Ndufa4/Ndufa12/Ndufs8/Uqcr10/Ndufs1/Ndufs2/Ndufv1/Ndufa10/Ndufs5/Ndufa5/Cox6c/Ndufc2/Uqcrq/Ndufa2/Ndufb4/Gm3244/Gm3873/Ndufa6/Ndufb7/Uqcrc1/Ndufv2/Uqcrc2/Ndufa9/Ndufs3/Ndufa13/Cdk5/Ndufs6/Ncstn/Cox7a2l/Uqcr11/Ndufb9/Uqcrfs1/Ndufa7/COX1/Cox7c/Casp7/Ndufs7/Cox5a/Cox7b/Mapk1/Ndufb2/CYTB/Ndufa3/Ndufa8	48
mmu03010	mmu03010	Ribosome	572	102/1978	2.13865e-05	0.000870736	0.000870736	Rpl18a/Mrpl2/Rpl7/Rplp0/Rpl12/Rpl29/Gm8210/Rps20/Rpl26/Rps4x/Rpl23a/Rpl23/LOC100044627/LOC100862455/Rps26/Rpl30/Rps3/Rpl32/Rpl8/Rplp2/Rps9/Rpl11/Rpl34/Rpl34-ps1/Gm4705/Rpl35a/Rpl13a/Rpl18/Rpl6/Rpl13/Rpl9/Rps18/Rps28/Rps10/Rps3a1/Mrpl16/Rps21/Rpl14/Rpl4/Rpl38/Rpl27a/Rpl28/Rpl5/Rps15a/Rpl36al/Rpl36a/Rps19/Rps16/Rps25	49
mmu05016	mmu05016	Huntington's disease	572	109/1978	3.60362e-05	0.00128379	0.00128379	COX2/Tgm2/Cox7a2/Cox6b1/Ndufb6/Ndufa4/Ndufa12/Ndufs8/Uqcr10/Ndufs1/Ndufs2/Ndufv1/Ndufa10/Ndufs5/Ndufa5/Cox6c/Ndufc2/Uqcrq/Ndufa2/Ndufb4/Gm3244/Gm3873/Ndufa6/Ndufb7/Uqcrc1/Ndufv2/Uqcrc2/Ndufa9/Ndufs3/Ndufa13/Ndufs6/Cox7a2l/Uqcr11/Ndufb9/Uqcrfs1/Ndufa7/Hdac1/COX1/Cox7c/Polr2h/Ppif/Ndufs7/Sod2/Cox5a/Cox7b/Polr2b/Ndufb2/CYTB/Polr2e/Ndufa3/Ndufa8	51
mmu04260	mmu04260	Cardiac muscle contraction	572	27/1978	4.71681e-05	0.00149366	0.00149366	COX2/Cox7a2/Cox6b1/Atp1b3/Uqcr10/Cox6c/Uqcrq/Uqcrc1/Uqcrc2/Tpm3/Cox7a2l/Uqcr11/Uqcrfs1/COX1/Cox7c/Cox5a/Cox7b/CYTB	18
mmu05322	mmu05322	Systemic lupus erythematosus	572	35/1978	0.00388446	0.110707	0.110707	Cd28/Hist1h4f/Hist1h4d/Hist1h4c/Hist1h4b/Hist1h4a/Hist2h4/Hist1h4h/Hist1h4j/Hist1h4k/Hist1h4m/Hist1h4n/Hist1h4i/Hist4h4/H2afy/H2afx/Snrpd3/Actn1	18
mmu05340	mmu05340	Primary immunodeficiency	572	1978-10-01	0.00835415	0.216448	0.216448	Ada/Cd3d/Lck/Cd3e/Zap70/Il2rg/Cd4	7
mmu05034	mmu05034	Alcoholism	572	55/1978	0.0129891	0.30849	0.30849	Hist1h4f/Hist1h4d/Hist1h4c/Hist1h4b/Hist1h4a/Hist2h4/Hist1h4h/Hist1h4j/Hist1h4k/Hist1h4m/Hist1h4n/Hist1h4i/Hist4h4/Gng5/Gng5-ps/Gnai3/H2afy/Ppp1cc/Gm5601/Hdac1/H2afx/Ppp1ca/Gnai2/Mapk1	24
mmu03008	mmu03008	Ribosome biogenesis in eukaryotes	572	41/1978	0.027806	0.609593	0.609593	Rpp30/Snu13/LOC100862468/Rexo2/Emg1/Fbl/Nop58/Wdr43/Imp3/Gtpbp4/Nhp2/Tcof1/Sbds/Nat10/Gar1/Nvl/Dkc1/Gnl3	18
mmu04659	mmu04659	Th17 cell differentiation	572	41/1978	0.0562534	0.999953	0.999953	Il27ra/Cd3d/Lck/Cd3g/Cd3e/Zap70/Irf4/Il17f/Mapk11/Il2/Hsp90aa1/Rorc/Il2rg/Stat6/Mapk1/Lat/Cd4	17
mmu04640	mmu04640	Hematopoietic cell lineage	572	1978-11-01	0.066058	0.999953	0.999953	Cd3d/Cd3g/Cd5/Cd3e/Cd2/Cd4	6
mmu04660	mmu04660	T cell receptor signaling pathway	572	50/1978	0.167804	0.999953	0.999953	Cd3d/Lck/Cd3g/Cd3e/Cd28/Zap70/Malt1/Cblb/Akt2/Mapk11/Bcl10/Il2/Vav1/Mapk1/Dlg1/Card11/Lat/Cd4	18
mmu03410	mmu03410	Base excision repair	572	1978-08-01	0.174503	0.999953	0.999953	Apex1/Xrcc1/Hmgb1/Gm21596	4
mmu05323	mmu05323	Rheumatoid arthritis	572	20/1978	0.194782	0.999953	0.999953	Ctsl/Cd28/Itgal/Atp6v1a/Atp6v1e1/Atp6v0d2/Atp6v1d/Atp6ap1	8
mmu00360	mmu00360	Phenylalanine metabolism	572	1978-03-01	0.202379	0.999953	0.999953	Mif/Got2	2
mmu04142	mmu04142	Lysosome	572	55/1978	0.214661	0.999953	0.999953	Tpp1/Ctsl/Gusb/Lamp2/Ctse/Psap/Fuca1/Npc2/Lamp1/Ctsa/Hexb/Ap3s1/Ap3d1/Lgmn/Atp6v0d2/Ppt2/Gaa/Gba/Atp6ap1	19
mmu04658	mmu04658	Th1 and Th2 cell differentiation	572	33/1978	0.221051	0.999953	0.999953	Cd3d/Lck/Cd3g/Cd3e/Zap70/Mapk11/Il2/Il2rg/Stat6/Mapk1/Lat/Cd4	12
mmu03060	mmu03060	Protein export	572	18/1978	0.243573	0.999953	0.999953	Srprb/Sec61g/Gm4184/LOC102637269/Srpr/Srp14/Sec61b	7
mmu03020	mmu03020	RNA polymerase	572	1978-12-01	0.247778	0.999953	0.999953	Polr1a/Polr1c/Polr2h/Polr2b/Polr2e	5
mmu05321	mmu05321	Inflammatory bowel disease (IBD)	572	1978-12-01	0.247778	0.999953	0.999953	Il17f/Il2/Rorc/Il2rg/Stat6	5
mmu00010	mmu00010	Glycolysis / Gluconeogenesis	572	37/1978	0.250637	0.999953	0.999953	Hk2/Dld/Pgk1/Pfkl/Ldhb/Pgam2/Ldha/Pkm/Aldoa/Pgm1/Aldoc/Tpi1/Minpp1	13
mmu03015	mmu03015	mRNA surveillance pathway	572	47/1978	0.262924	0.999953	0.999953	Ppp1cc/Gm5601/Papola/Eif4a3/Cstf3/Nudt21/Rnmt/Cpsf1/Ddx39b/Alyref/Ppp1ca/Cstf2/Upf1/Clp1/Dazap1/Cpsf3	16
mmu00270	mmu00270	Cysteine and methionine metabolism	572	28/1978	0.271951	0.999953	0.999953	Dnmt3a/Mdh1/Ldhb/Ahcy/Gm4737/Ldha/Adi1/Mtr/Mat2a/Got2	10
mmu04022	mmu04022	cGMP-PKG signaling pathway	572	41/1978	0.278493	0.999953	0.999953	Atp2b1/Atp1b3/Akt2/Atp2b4/Pde5a/Gnai3/Gtf2i/Ppp1cc/Gm5601/Ppp1ca/Ppif/Gnai2/Gna13/Mapk1	14
mmu04024	mmu04024	cAMP signaling pathway	572	41/1978	0.278493	0.999953	0.999953	Atp2b1/Atp1b3/Akt2/Atp2b4/Rap1b/Gnai3/Ppp1cc/Gm5601/Vav1/Ppp1ca/Gnai2/Rras2/Mapk1/Rac2	14
mmu04392	mmu04392	Hippo signaling pathway - multiple species	572	1978-01-01	0.289181	0.999953	0.999953	Rassf2	1
mmu04213	mmu04213	Longevity regulating pathway - multiple species	572	19/1978	0.295955	0.999953	0.999953	Hspa8/Akt2/Cat/Foxo1/Hdac1/Sod2/Prkaa1	7
mmu00450	mmu00450	Selenocompound metabolism	572	1978-10-01	0.321504	0.999953	0.999953	Mtr/Sephs1/Papss1/Kyat3	4
mmu00920	mmu00920	Sulfur metabolism	572	1978-07-01	0.328373	0.999953	0.999953	Impad1/Papss1/Sqor	3
mmu04614	mmu04614	Renin-angiotensin system	572	1978-07-01	0.328373	0.999953	0.999953	Ctsa/Lnpep/Atp6ap2	3
mmu00531	mmu00531	Glycosaminoglycan degradation	572	1978-04-01	0.329211	0.999953	0.999953	Gusb/Hexb	2
mmu04672	mmu04672	Intestinal immune network for IgA production	572	1978-04-01	0.329211	0.999953	0.999953	Cd28/Il2	2
mmu04261	mmu04261	Adrenergic signaling in cardiomyocytes	572	36/1978	0.335552	0.999953	0.999953	Atp2b1/Atp1b3/Akt2/Atp2b4/Gnai3/Mapk11/Tpm3/Ppp1cc/Gm5601/Ppp1ca/Gnai2/Mapk1	12
mmu00562	mmu00562	Inositol phosphate metabolism	572	23/1978	0.337707	0.999953	0.999953	Inppl1/Impad1/Tpi1/Itpk1/Pip4k2c/Pik3c3/Aldh6a1/Minpp1	8
mmu03018	mmu03018	RNA degradation	572	46/1978	0.340076	0.999953	0.999953	Pfkl/Dcps/Lsm2/Lsm3/Lsm8/Dis3l/Exosc10/Lsm6/Exosc3/Dis3/Exosc7/Exosc9/Cnot3/Exosc4/Exosc6	15
mmu01100	mmu01100	Metabolic pathways	572	457/1978	0.345611	0.999953	0.999953	Hk2/Dld/Pld3/Dnmt3a/COX2/Ada/Pgk1/Gusb/Pfkl/Mdh1/Nme1/Ldhb/Aco1/Cpox/Hmgcl/Ahcy/Gm4737/Adk/Cox6b1/Ctps2/Ndufb6/Ndufa4/Ndufa12/Cyp51/Ndufs8/Uqcr10/Acly/Ndufs1/Ndufs2/Ndufv1/Taldo1/Ndufa10/Ndufs5/Ndufa5/Cox6c/Lap3/Ndufc2/Uqcrq/Ndufa2/Ndufb4/Gm3244/Gm3873/Ndufa6/Ndufb7/Uqcrc1/Ndufv2/Uqcrc2/Ndufa9/Ndufs3/Ndufa13/Ak4/Pgam2/Gnpda1/Ldha/Hexb/Pkm/Ndufs6/Dad1/Pfas/Gk/Hmgcs1/Mthfd1/Pcyt2/Adi1/Uqcr11/Ndufb9…	136
mmu04514	mmu04514	Cell adhesion molecules (CAMs)	572	20/1978	0.350433	0.999953	0.999953	Cd28/Icam2/Cd2/Sell/Itgal/Cd4/Spn	7
mmu00051	mmu00051	Fructose and mannose metabolism	572	17/1978	0.364503	0.999953	0.999953	Hk2/Pfkl/Aldoa/Aldoc/Tpi1/Pmm2	6
mmu04727	mmu04727	GABAergic synapse	572	17/1978	0.364503	0.999953	0.999953	Gng5/Gng5-ps/Gnai3/Nsf/Gnai2/Slc38a1	6
mmu00510	mmu00510	N-Glycan biosynthesis	572	14/1978	0.380336	0.999953	0.999953	Dad1/Man2a1/Stt3a/Dpm3/Man1a	5
mmu00640	mmu00640	Propanoate metabolism	572	21/1978	0.405802	0.999953	0.999953	Dld/Ldhb/Ldha/Echdc1/Sucla2/Acadm/Aldh6a1	7
mmu04330	mmu04330	Notch signaling pathway	572	1978-08-01	0.420695	0.999953	0.999953	Ncstn/Hdac1/Ctbp1	3
mmu04978	mmu04978	Mineral absorption	572	1978-08-01	0.420695	0.999953	0.999953	Atp2b1/Atox1/Atp1b3	3
mmu05030	mmu05030	Cocaine addiction	572	1978-08-01	0.420695	0.999953	0.999953	Gnai3/Cdk5/Gnai2	3
mmu00350	mmu00350	Tyrosine metabolism	572	1978-05-01	0.449489	0.999953	0.999953	Mif/Got2	2
mmu00830	mmu00830	Retinol metabolism	572	1978-05-01	0.449489	0.999953	0.999953	Dgat1/Cyp2s1	2
mmu04975	mmu04975	Fat digestion and absorption	572	1978-05-01	0.449489	0.999953	0.999953	Dgat1/Got2	2
mmu05320	mmu05320	Autoimmune thyroid disease	572	1978-05-01	0.449489	0.999953	0.999953	Cd28/Il2	2
mmu05330	mmu05330	Allograft rejection	572	1978-05-01	0.449489	0.999953	0.999953	Cd28/Il2	2
mmu05332	mmu05332	Graft-versus-host disease	572	1978-05-01	0.449489	0.999953	0.999953	Cd28/Il2	2
mmu04611	mmu04611	Platelet activation	572	39/1978	0.458895	0.999953	0.999953	Actb/Stim1/Akt2/Rap1b/Gnai3/Mapk11/Ppp1cc/Gm5601/Ppp1ca/Gnai2/Gna13/Mapk1	12
mmu04721	mmu04721	Synaptic vesicle cycle	572	22/1978	0.460938	0.999953	0.999953	Nsf/Napa/Atp6v1a/Atp6v1e1/Atp6v0d2/Atp6v1d/Dnm3	7
mmu00500	mmu00500	Starch and sucrose metabolism	572	1978-12-01	0.474059	0.999953	0.999953	Hk2/Pgm1/Pgm2l1/Gaa	4
mmu05216	mmu05216	Thyroid cancer	572	1978-12-01	0.474059	0.999953	0.999953	Tpr/Tpm3/Tcf7/Mapk1	4
mmu05416	mmu05416	Viral myocarditis	572	1978-12-01	0.474059	0.999953	0.999953	Cd28/Actb/Itgal/Rac2	4
mmu04670	mmu04670	Leukocyte transendothelial migration	572	36/1978	0.476646	0.999953	0.999953	Actb/Rap1b/Gnai3/Ptk2b/Mapk11/Itgal/Msn/Vav1/Gnai2/Actn1/Rac2	11
mmu00232	mmu00232	Caffeine metabolism	572	1978-02-01	0.49484	0.999953	0.999953	Nat2	1
mmu00400	mmu00400	Phenylalanine, tyrosine and tryptophan biosynthesis	572	1978-02-01	0.49484	0.999953	0.999953	Got2	1
mmu00440	mmu00440	Phosphonate and phosphinate metabolism	572	1978-02-01	0.49484	0.999953	0.999953	Pcyt2	1
mmu00524	mmu00524	Neomycin, kanamycin and gentamicin biosynthesis	572	1978-02-01	0.49484	0.999953	0.999953	Hk2	1
mmu00532	mmu00532	Glycosaminoglycan biosynthesis - chondroitin sulfate / dermatan sulfate	572	1978-02-01	0.49484	0.999953	0.999953	Ust	1
mmu03450	mmu03450	Non-homologous end-joining	572	1978-02-01	0.49484	0.999953	0.999953	Xrcc5	1
mmu04977	mmu04977	Vitamin digestion and absorption	572	1978-02-01	0.49484	0.999953	0.999953	Lmbrd1	1
mmu00860	mmu00860	Porphyrin and chlorophyll metabolism	572	1978-09-01	0.508237	0.999953	0.999953	Gusb/Cpox/Urod	3
mmu04972	mmu04972	Pancreatic secretion	572	16/1978	0.512117	0.999953	0.999953	Atp2b1/Atp1b3/Atp2b4/Rap1b/Rab8a	5
mmu04650	mmu04650	Natural killer cell mediated cytotoxicity	572	34/1978	0.539999	0.999953	0.999953	Sh2d1a/Lck/Icam2/Zap70/Ptk2b/Itgal/Vav1/Mapk1/Lat/Rac2	10
mmu05230	mmu05230	Central carbon metabolism in cancer	572	27/1978	0.540521	0.999953	0.999953	Hk2/Pfkl/Slc16a3/Akt2/Pgam2/Ldha/Pkm/Mapk1	8
mmu00230	mmu00230	Purine metabolism	572	69/1978	0.541749	0.999953	0.999953	Ada/Nme1/Adk/Pde5a/Ak4/Pkm/Pfas/Enpp4/Polr1a/Aprt/Pola1/Polr1c/Pgm1/Polr2h/Atic/Nme3/Papss1/Polr2b/Pde6d/Polr2e	20
mmu03022	mmu03022	Basal transcription factors	572	13/1978	0.545572	0.999953	0.999953	Gtf2i/Gtf2e1/Ccnh/Gtf2a1	4
mmu04966	mmu04966	Collecting duct acid secretion	572	13/1978	0.545572	0.999953	0.999953	Atp6v1a/Atp6v1e1/Atp6v0d2/Atp6v1d	4
mmu04970	mmu04970	Salivary secretion	572	13/1978	0.545572	0.999953	0.999953	Atp2b1/Atp1b3/Atp2b4/Cst3	4
mmu05031	mmu05031	Amphetamine addiction	572	13/1978	0.545572	0.999953	0.999953	Ppp1cc/Gm5601/Hdac1/Ppp1ca	4
mmu00072	mmu00072	Synthesis and degradation of ketone bodies	572	1978-06-01	0.556402	0.999953	0.999953	Hmgcl/Hmgcs1	2
mmu04940	mmu04940	Type I diabetes mellitus	572	1978-06-01	0.556402	0.999953	0.999953	Cd28/Il2	2
mmu00620	mmu00620	Pyruvate metabolism	572	24/1978	0.566714	0.999953	0.999953	Dld/Mdh1/Ldhb/Acyp1/Glo1/Ldha/Pkm	7
mmu04664	mmu04664	Fc epsilon RI signaling pathway	572	24/1978	0.566714	0.999953	0.999953	Akt2/Mapk11/Vav1/Alox5ap/Mapk1/Lat/Rac2	7
mmu04713	mmu04713	Circadian entrainment	572	17/1978	0.573623	0.999953	0.999953	Gng5/Gng5-ps/Gnai3/Gnai2/Mapk1	5
mmu00670	mmu00670	One carbon pool by folate	572	1978-10-01	0.588265	0.999953	0.999953	Mthfd1/Mtr/Atic	3
mmu01230	mmu01230	Biosynthesis of amino acids	572	46/1978	0.595862	0.999953	0.999953	Pgk1/Pfkl/Aco1/Taldo1/Pgam2/Pkm/Mtr/Aldoa/Mat2a/Pycrl/Aldoc/Tpi1/Got2	13
mmu04520	mmu04520	Adherens junction	572	21/1978	0.596442	0.999953	0.999953	Actb/Tcf7/Wasf2/Mapk1/Actn1/Rac2	6
mmu05202	mmu05202	Transcriptional misregulation in cancer	572	39/1978	0.600353	0.999953	0.999953	Fus/Etv6/Ewsr1/Pml/Cdk9/Foxo1/Hdac1/Cdkn1b/Mpo/Atm/Ccnt1	11
mmu00052	mmu00052	Galactose metabolism	572	14/1978	0.611667	0.999953	0.999953	Hk2/Pfkl/Pgm1/Gaa	4
mmu05032	mmu05032	Morphine addiction	572	14/1978	0.611667	0.999953	0.999953	Gng5/Gng5-ps/Gnai3/Gnai2	4
mmu04915	mmu04915	Estrogen signaling pathway	572	25/1978	0.615868	0.999953	0.999953	Hspa8/Akt2/Gnai3/Hsp90aa1/Gnai2/Fkbp4/Mapk1	7
mmu04145	mmu04145	Phagosome	572	54/1978	0.62585	0.999953	0.999953	Ctsl/Lamp2/Actb/Lamp1/Sec61g/Gm4184/LOC102637269/Atp6v1a/Atp6v1e1/Atp6v0d2/Mpo/Atp6v1d/Sec61b/Pik3c3/Atp6ap1	15
mmu05203	mmu05203	Viral carcinogenesis	572	90/1978	0.63667	0.999953	0.999953	Hist1h4f/Hist1h4d/Hist1h4c/Hist1h4b/Hist1h4a/Hist2h4/Hist1h4h/Hist1h4j/Hist1h4k/Hist1h4m/Hist1h4n/Hist1h4i/Hist4h4/Pkm/Scrib/Hdac1/Cdkn1b/Hnrnpk/Atp6v0d2/Gtf2e1/Mapk1/Actn1/Dlg1/Dnaja3/Gtf2a1	25
mmu00512	mmu00512	Mucin type O-glycan biosynthesis	572	1978-03-01	0.641071	0.999953	0.999953	Galnt2	1
mmu00603	mmu00603	Glycosphingolipid biosynthesis - globo and isoglobo series	572	1978-03-01	0.641071	0.999953	0.999953	Hexb	1
mmu00770	mmu00770	Pantothenate and CoA biosynthesis	572	1978-03-01	0.641071	0.999953	0.999953	Pank4	1
mmu04122	mmu04122	Sulfur relay system	572	1978-03-01	0.641071	0.999953	0.999953	Ctu2	1
mmu04610	mmu04610	Complement and coagulation cascades	572	1978-03-01	0.641071	0.999953	0.999953	F13a1	1
mmu04913	mmu04913	Ovarian steroidogenesis	572	1978-03-01	0.641071	0.999953	0.999953	Cyp11a1	1
mmu05150	mmu05150	Staphylococcus aureus infection	572	1978-03-01	0.641071	0.999953	0.999953	Itgal	1
mmu05162	mmu05162	Measles	572	51/1978	0.645054	0.999953	0.999953	Sh2d1a/Cd3d/Cd3g/Cd3e/Cd28/Hspa8/Cblb/Akt2/Msn/Slamf1/Il2/Cdkn1b/Rab9/Il2rg	14
mmu04211	mmu04211	Longevity regulating pathway	572	22/1978	0.647255	0.999953	0.999953	Akt2/Cat/Appl1/Foxo1/Sod2/Prkaa1	6
mmu04921	mmu04921	Oxytocin signaling pathway	572	33/1978	0.648122	0.999953	0.999953	Actb/Gnai3/Ppp1cc/Gm5601/Eef2/Ppp1ca/Gnai2/Mapk1/Prkaa1	9
mmu04150	mmu04150	mTOR signaling pathway	572	44/1978	0.652368	0.999953	0.999953	Akt2/Cab39/Eif4b/Lamtor3/Rps6ka3/Atp6v1a/Atp6v1e1/Lamtor1/Atp6v1d/Mapk1/Prkaa1/Lamtor2	12
mmu00511	mmu00511	Other glycan degradation	572	1978-11-01	0.659378	0.999953	0.999953	Fuca1/Hexb/Gba	3
mmu04923	mmu04923	Regulation of lipolysis in adipocytes	572	1978-11-01	0.659378	0.999953	0.999953	Akt2/Gnai3/Gnai2	3
mmu04930	mmu04930	Type II diabetes mellitus	572	1978-11-01	0.659378	0.999953	0.999953	Hk2/Pkm/Mapk1	3
mmu04973	mmu04973	Carbohydrate digestion and absorption	572	1978-11-01	0.659378	0.999953	0.999953	Hk2/Atp1b3/Akt2	3
mmu04612	mmu04612	Antigen processing and presentation	572	26/1978	0.661834	0.999953	0.999953	Ctsl/Psme3/Hspa8/Nfyb/Lgmn/Hsp90aa1/Cd4	7
mmu04371	mmu04371	Apelin signaling pathway	572	37/1978	0.661937	0.999953	0.999953	Akt2/Gng5/Gng5-ps/Gnai3/Gnai2/Gna13/Rras2/Mapk1/Prkaa1/Pik3c3	10
mmu04730	mmu04730	Long-term depression	572	15/1978	0.671459	0.999953	0.999953	Gnai3/Gnai2/Gna13/Mapk1	4
mmu04971	mmu04971	Gastric acid secretion	572	15/1978	0.671459	0.999953	0.999953	Actb/Atp1b3/Gnai3/Gnai2	4
mmu04662	mmu04662	B cell receptor signaling pathway	572	30/1978	0.674999	0.999953	0.999953	Malt1/Akt2/Inppl1/Bcl10/Vav1/Mapk1/Card11/Rac2	8
mmu00330	mmu00330	Arginine and proline metabolism	572	19/1978	0.683044	0.999953	0.999953	Lap3/Gatm/P4ha1/Pycrl/Got2	5
mmu04726	mmu04726	Serotonergic synapse	572	19/1978	0.683044	0.999953	0.999953	Gng5/Gng5-ps/Gnai3/Gnai2/Mapk1	5
mmu04922	mmu04922	Glucagon signaling pathway	572	34/1978	0.687047	0.999953	0.999953	Pfkl/Ldhb/Akt2/Pgam2/Ldha/Pkm/Ppp4r3a/Foxo1/Prkaa1	9
mmu04720	mmu04720	Long-term potentiation	572	23/1978	0.693986	0.999953	0.999953	Rap1b/Ppp1cc/Gm5601/Rps6ka3/Ppp1ca/Mapk1	6
mmu04724	mmu04724	Glutamatergic synapse	572	23/1978	0.693986	0.999953	0.999953	Gng5/Gng5-ps/Gnai3/Gnai2/Mapk1/Slc38a1	6
mmu05418	mmu05418	Fluid shear stress and atherosclerosis	572	38/1978	0.698181	0.999953	0.999953	Ctsl/Actb/Akt2/Mapk11/Map3k5/Gstm1/Hsp90aa1/Sumo2/Prkaa1/Rac2	10
mmu05204	mmu05204	Chemical carcinogenesis	572	1978-12-01	0.721151	0.999953	0.999953	Gstm1/Nat2/Kyat3	3
mmu05142	mmu05142	Chagas disease (American trypanosomiasis)	572	35/1978	0.723206	0.999953	0.999953	Cd3d/Cd3g/Cd3e/Akt2/Gnai3/Mapk11/Il2/Gnai2/Mapk1	9
mmu00140	mmu00140	Steroid hormone biosynthesis	572	1978-08-01	0.723252	0.999953	0.999953	Srd5a3/Cyp11a1	2
mmu00565	mmu00565	Ether lipid metabolism	572	1978-08-01	0.723252	0.999953	0.999953	Pld3/Lpcat4	2
mmu04216	mmu04216	Ferroptosis	572	16/1978	0.724573	0.999953	0.999953	Pcbp1/Acsl3/Pcbp2/Lpcat3	4
mmu04916	mmu04916	Melanogenesis	572	16/1978	0.724573	0.999953	0.999953	Gnai3/Tcf7/Gnai2/Mapk1	4
mmu00030	mmu00030	Pentose phosphate pathway	572	20/1978	0.730067	0.999953	0.999953	Pfkl/Taldo1/Aldoa/Pgm1/Aldoc	5
mmu05133	mmu05133	Pertussis	572	20/1978	0.730067	0.999953	0.999953	Gnai3/Mapk11/Casp7/Gnai2/Mapk1	5
mmu04152	mmu04152	AMPK signaling pathway	572	39/1978	0.731915	0.999953	0.999953	Pfkl/Akt2/Rab8a/Cab39/Foxo1/Eef2/Tbc1d1/Elavl1/Prkaa1/Rab14	10
mmu00020	mmu00020	Citrate cycle (TCA cycle)	572	24/1978	0.73641	0.999953	0.999953	Dld/Mdh1/Aco1/Acly/Sucla2/Dlst	6
mmu04015	mmu04015	Rap1 signaling pathway	572	43/1978	0.740189	0.999953	0.999953	Actb/Akt2/Rap1b/Gnai3/Mapk11/Itgal/Rapgef2/Gnai2/Mapk1/Lat/Rac2	11
mmu04390	mmu04390	Hippo signaling pathway	572	28/1978	0.743076	0.999953	0.999953	Actb/Ppp1cc/Gm5601/Tcf7/Scrib/Ppp1ca/Dlg1	7
mmu04657	mmu04657	IL-17 signaling pathway	572	28/1978	0.743076	0.999953	0.999953	Srsf1/Il17f/Mapk11/Hsp90aa1/S100a9/Mapk1/Elavl1	7
mmu00130	mmu00130	Ubiquinone and other terpenoid-quinone biosynthesis	572	1978-04-01	0.745024	0.999953	0.999953	Vkorc1l1	1
mmu00740	mmu00740	Riboflavin metabolism	572	1978-04-01	0.745024	0.999953	0.999953	Flad1	1
mmu04064	mmu04064	NF-kappa B signaling pathway	572	32/1978	0.749814	0.999953	0.999953	Lck/Zap70/Malt1/Bcl10/Atm/Tab1/Card11/Lat	8
mmu00630	mmu00630	Glyoxylate and dicarboxylate metabolism	572	17/1978	0.771019	0.999953	0.999953	Dld/Mdh1/Aco1/Cat	4
mmu05410	mmu05410	Hypertrophic cardiomyopathy (HCM)	572	17/1978	0.771019	0.999953	0.999953	Actb/Tpm3/Ttn/Prkaa1	4
mmu00983	mmu00983	Drug metabolism - other enzymes	572	13/1978	0.773824	0.999953	0.999953	Gusb/Nat2/Uck2	3
mmu04725	mmu04725	Cholinergic synapse	572	25/1978	0.774476	0.999953	0.999953	Akt2/Gng5/Gng5-ps/Gnai3/Gnai2/Mapk1	6
mmu04510	mmu04510	Focal adhesion	572	52/1978	0.781742	0.999953	0.999953	Actb/Akt2/Rap1b/Diaph1/Ppp1cc/Gm5601/Flna/Vav1/Ppp1ca/Mapk1/Actn1/Flnb/Rac2	13
mmu04710	mmu04710	Circadian rhythm	572	1978-09-01	0.784685	0.999953	0.999953	Rorc/Prkaa1	2
mmu04960	mmu04960	Aldosterone-regulated sodium reabsorption	572	1978-09-01	0.784685	0.999953	0.999953	Atp1b3/Mapk1	2
mmu04964	mmu04964	Proximal tubule bicarbonate reclamation	572	1978-09-01	0.784685	0.999953	0.999953	Mdh1/Atp1b3	2
mmu04068	mmu04068	FoxO signaling pathway	572	37/1978	0.786892	0.999953	0.999953	Akt2/Mapk11/Cat/Foxo1/Cdkn1b/Sod2/Mapk1/Prkaa1/Atm	9
mmu04728	mmu04728	Dopaminergic synapse	572	41/1978	0.791591	0.999953	0.999953	Akt2/Gng5/Gng5-ps/Gnai3/Mapk11/Ppp1cc/Gm5601/Ppp1ca/Gnai2/Gsk3a	10
mmu05168	mmu05168	Herpes simplex infection	572	60/1978	0.793295	0.999953	0.999953	Srsf3/Srsf2/Srsf1/Gtf2i/Ppp1cc/Gm5601/Srsf6/Pml/Alyref/Hmgn1/Hnrnpk/Ppp1ca/Hcfc1/Tab1/Srsf7	15
mmu05221	mmu05221	Acute myeloid leukemia	572	22/1978	0.808463	0.999953	0.999953	Akt2/Tcf7/Pml/Mpo/Mapk1	5
mmu04925	mmu04925	Aldosterone synthesis and secretion	572	18/1978	0.811082	0.999953	0.999953	Atp2b1/Atp1b3/Atp2b4/Cyp11a1	4
mmu05140	mmu05140	Leishmaniasis	572	18/1978	0.811082	0.999953	0.999953	Marcksl1/Mapk11/Mapk1/Tab1	4
mmu05145	mmu05145	Toxoplasmosis	572	34/1978	0.811682	0.999953	0.999953	Hspa8/Akt2/Gnai3/Mapk11/Ppif/Gnai2/Mapk1/Tab1	8
mmu00260	mmu00260	Glycine, serine and threonine metabolism	572	14/1978	0.818049	0.999953	0.999953	Dld/Pgam2/Gatm	3
mmu03320	mmu03320	PPAR signaling pathway	572	14/1978	0.818049	0.999953	0.999953	Gk/Acsl3/Acadm	3
mmu04060	mmu04060	Cytokine-cytokine receptor interaction	572	14/1978	0.818049	0.999953	0.999953	Il17f/Il2/Il2rg	3
mmu00514	mmu00514	Other types of O-glycan biosynthesis	572	1978-05-01	0.818908	0.999953	0.999953	Poglut1	1
mmu00604	mmu00604	Glycosphingolipid biosynthesis - ganglio series	572	1978-05-01	0.818908	0.999953	0.999953	Hexb	1
mmu00730	mmu00730	Thiamine metabolism	572	1978-05-01	0.818908	0.999953	0.999953	Ak4	1
mmu05225	mmu05225	Hepatocellular carcinoma	572	46/1978	0.820901	0.999953	0.999953	Actb/Akt2/Smarcc2/Gstm1/Tcf7/Smarca4/Smarcb1/Smarce1/Smarcd1/Arid1a/Mapk1	11
mmu04146	mmu04146	Peroxisome	572	31/1978	0.837378	0.999953	0.999953	Prdx1/Hmgcl/Cat/Acsl3/Sod2/Pex14/Far1	7
mmu04668	mmu04668	TNF signaling pathway	572	35/1978	0.837897	0.999953	0.999953	Junb/Akt2/Mapk11/Map3k5/Casp7/Mapk1/Tab1/Rps6ka4	8
mmu05215	mmu05215	Prostate cancer	572	27/1978	0.837975	0.999953	0.999953	Akt2/Tcf7/Foxo1/Hsp90aa1/Cdkn1b/Mapk1	6
mmu03030	mmu03030	DNA replication	572	23/1978	0.840263	0.999953	0.999953	Mcm4/Pola1/Mcm3/Mcm2/Mcm7	5
mmu05205	mmu05205	Proteoglycans in cancer	572	59/1978	0.850949	0.999953	0.999953	Ctsl/Actb/Cblb/Akt2/Mapk11/Msn/Ppp1cc/Gm5601/Eif4b/Flna/Ppp1ca/Rras2/Mapk1/Flnb	14
mmu04914	mmu04914	Progesterone-mediated oocyte maturation	572	36/1978	0.861154	0.999953	0.999953	Akt2/Gnai3/Mapk11/Hsp90aa1/Rps6ka3/Anapc7/Gnai2/Mapk1	8
mmu03013	mmu03013	RNA transport	572	94/1978	0.86326	0.999953	0.999953	Tpr/Rpp30/Eif3j2/Eif1a/Fxr1/Eif4b/Nup35/Eif4a3/Ddx39b/Alyref/Sumo2/Eif2b2/Nup155/Nup37/Upf1/Ranbp2/Rangap1/Eif2b4/Eif1ax/Nup50/Phax/Eif1/Nup88	23
mmu04072	mmu04072	Phospholipase D signaling pathway	572	28/1978	0.863856	0.999953	0.999953	Akt2/Ptk2b/Gna13/Rras2/Mapk1/Dnm3	6
mmu04020	mmu04020	Calcium signaling pathway	572	24/1978	0.867592	0.999953	0.999953	Atp2b1/Stim1/Atp2b4/Ptk2b/Ppif	5
mmu05231	mmu05231	Choline metabolism in cancer	572	24/1978	0.867592	0.999953	0.999953	Akt2/Slc44a2/Wasf2/Mapk1/Rac2	5
mmu04010	mmu04010	MAPK signaling pathway	572	64/1978	0.8706	0.999953	0.999953	Hspa8/Akt2/Rap1b/Mapk11/Map3k5/Flna/Rapgef2/Lamtor3/Rps6ka3/Rras2/Mapk1/Flnb/Tab1/Rps6ka4/Rac2	15
mmu00982	mmu00982	Drug metabolism - cytochrome P450	572	1978-06-01	0.871409	0.999953	0.999953	Gstm1	1
mmu05144	mmu05144	Malaria	572	1978-06-01	0.871409	0.999953	0.999953	Itgal	1
mmu00650	mmu00650	Butanoate metabolism	572	1978-11-01	0.872549	0.999953	0.999953	Hmgcl/Hmgcs1	2
mmu00980	mmu00980	Metabolism of xenobiotics by cytochrome P450	572	1978-11-01	0.872549	0.999953	0.999953	Gstm1/Cyp2s1	2
mmu01210	mmu01210	2-Oxocarboxylic acid metabolism	572	1978-11-01	0.872549	0.999953	0.999953	Aco1/Got2	2
mmu05412	mmu05412	Arrhythmogenic right ventricular cardiomyopathy (ARVC)	572	1978-11-01	0.872549	0.999953	0.999953	Actb/Tcf7	2
mmu00564	mmu00564	Glycerophospholipid metabolism	572	20/1978	0.874014	0.999953	0.999953	Pld3/Pcyt2/Lpcat4/Lpcat3	4
mmu04071	mmu04071	Sphingolipid signaling pathway	572	45/1978	0.880775	0.999953	0.999953	Akt2/Gnai3/Mapk11/Map3k5/Nsmaf/Sgpl1/Gnai2/Gna13/Mapk1/Rac2	10
mmu04910	mmu04910	Insulin signaling pathway	572	49/1978	0.881182	0.999953	0.999953	Hk2/Cblb/Akt2/Inppl1/Flot1/Ppp1cc/Gm5601/Foxo1/Ppp1ca/Mapk1/Prkaa1	11
mmu04961	mmu04961	Endocrine and other factor-regulated calcium reabsorption	572	16/1978	0.884726	0.999953	0.999953	Atp2b1/Atp1b3/Dnm3	3
mmu05414	mmu05414	Dilated cardiomyopathy (DCM)	572	16/1978	0.884726	0.999953	0.999953	Actb/Tpm3/Ttn	3
mmu01524	mmu01524	Platinum drug resistance	572	29/1978	0.886219	0.999953	0.999953	Akt2/Map3k5/Gstm1/Top2b/Mapk1/Atm	6
mmu00240	mmu00240	Pyrimidine metabolism	572	46/1978	0.897406	0.999953	0.999953	Nme1/Ctps2/Polr1a/Pola1/Polr1c/Polr2h/Nme3/Polr2b/Uck2/Polr2e	10
mmu04140	mmu04140	Autophagy - animal	572	46/1978	0.897406	0.999953	0.999953	Ctsl/Lamp2/Akt2/Lamp1/Hmgb1/Gm21596/Rras2/Mapk1/Prkaa1/Pik3c3	10
mmu04370	mmu04370	VEGF signaling pathway	572	21/1978	0.898059	0.999953	0.999953	Akt2/Mapk11/Mapk1/Rac2	4
mmu04931	mmu04931	Insulin resistance	572	38/1978	0.899564	0.999953	0.999953	Akt2/Mgea5/Ppp1cc/Gm5601/Foxo1/Rps6ka3/Ppp1ca/Prkaa1	8
mmu04926	mmu04926	Relaxin signaling pathway	572	34/1978	0.90188	0.999953	0.999953	Akt2/Gng5/Gng5-ps/Gnai3/Mapk11/Gnai2/Mapk1	7
mmu04924	mmu04924	Renin secretion	572	1978-12-01	0.902829	0.999953	0.999953	Gnai3/Gnai2	2
mmu01200	mmu01200	Carbon metabolism	572	78/1978	0.903437	0.999953	0.999953	Hk2/Dld/Pgk1/Pfkl/Mdh1/Aco1/Taldo1/Pgam2/Cat/Pkm/Aldoa/Sucla2/Aldoc/Tpi1/Acadm/Dlst/Got2/Aldh6a1	18
mmu04360	mmu04360	Axon guidance	572	30/1978	0.905393	0.999953	0.999953	Gnai3/Cdk5/Gnai2/Mapk1/Rac2/Ablim1	6
mmu04933	mmu04933	AGE-RAGE signaling pathway in diabetic complications	572	30/1978	0.905393	0.999953	0.999953	Akt2/Mapk11/Diaph1/Foxo1/Cdkn1b/Mapk1	6
mmu00040	mmu00040	Pentose and glucuronate interconversions	572	1978-07-01	0.908708	0.999953	0.999953	Gusb	1
mmu00061	mmu00061	Fatty acid biosynthesis	572	1978-07-01	0.908708	0.999953	0.999953	Acsl3	1
mmu00220	mmu00220	Arginine biosynthesis	572	1978-07-01	0.908708	0.999953	0.999953	Got2	1
mmu00590	mmu00590	Arachidonic acid metabolism	572	1978-07-01	0.908708	0.999953	0.999953	Ptges3	1
mmu05217	mmu05217	Basal cell carcinoma	572	1978-07-01	0.908708	0.999953	0.999953	Tcf7	1
mmu05219	mmu05219	Bladder cancer	572	1978-07-01	0.908708	0.999953	0.999953	Mapk1	1
mmu01522	mmu01522	Endocrine resistance	572	26/1978	0.910539	0.999953	0.999953	Akt2/Mapk11/Cdkn1b/Carm1/Mapk1	5
mmu04070	mmu04070	Phosphatidylinositol signaling system	572	26/1978	0.910539	0.999953	0.999953	Inppl1/Impad1/Itpk1/Pip4k2c/Pik3c3	5
mmu04270	mmu04270	Vascular smooth muscle contraction	572	26/1978	0.910539	0.999953	0.999953	Ppp1cc/Gm5601/Ppp1ca/Gna13/Mapk1	5
mmu04630	mmu04630	Jak-STAT signaling pathway	572	26/1978	0.910539	0.999953	0.999953	Il27ra/Akt2/Il2/Il2rg/Stat6	5
mmu04110	mmu04110	Cell cycle	572	51/1978	0.911385	0.999953	0.999953	Smc1a/Mcm4/Hdac1/Cdkn1b/Anapc7/Mcm3/Mcm2/Ccnh/Mcm7/Atm/Smc3	11
mmu04666	mmu04666	Fc gamma R-mediated phagocytosis	572	39/1978	0.915148	0.999953	0.999953	Marcksl1/Akt2/Inppl1/Vav1/Wasf2/Mapk1/Lat/Rac2	8
mmu05014	mmu05014	Amyotrophic lateral sclerosis (ALS)	572	22/1978	0.917969	0.999953	0.999953	Mapk11/Map3k5/Cat/Derl1	4
mmu00410	mmu00410	beta-Alanine metabolism	572	13/1978	0.926284	0.999953	0.999953	Acadm/Aldh6a1	2
mmu04130	mmu04130	SNARE interactions in vesicular transport	572	13/1978	0.926284	0.999953	0.999953	Stx8/Stx4a	2
mmu05132	mmu05132	Salmonella infection	572	36/1978	0.931567	0.999953	0.999953	Actb/Mapk11/Rhog/Flna/Wasf2/Mapk1/Flnb	7
mmu04810	mmu04810	Regulation of actin cytoskeleton	572	73/1978	0.933229	0.999953	0.999953	Actb/Iqgap2/Diaph1/Itgal/Msn/Ppp1cc/Gm5601/Vav1/Ppp1ca/Wasf2/Gna13/Rras2/Mapk1/Actn1/Pip4k2c/Rac2	16
mmu04750	mmu04750	Inflammatory mediator regulation of TRP channels	572	23/1978	0.934329	0.999953	0.999953	Mapk11/Ppp1cc/Gm5601/Ppp1ca	4
mmu05152	mmu05152	Tuberculosis	572	53/1978	0.934879	0.999953	0.999953	Lamp2/Malt1/Akt2/Mapk11/Lamp1/Nfyb/Bcl10/Atp6v0d2/Mapk1/Pik3c3/Atp6ap1	11
mmu04974	mmu04974	Protein digestion and absorption	572	1978-08-01	0.935202	0.999953	0.999953	Atp1b3	1
mmu04919	mmu04919	Thyroid hormone signaling pathway	572	32/1978	0.935522	0.999953	0.999953	Actb/Atp1b3/Akt2/Foxo1/Hdac1/Mapk1	6
mmu00520	mmu00520	Amino sugar and nucleotide sugar metabolism	572	28/1978	0.940764	0.999953	0.999953	Hk2/Gnpda1/Hexb/Pgm1/Pmm2	5
mmu05210	mmu05210	Colorectal cancer	572	28/1978	0.940764	0.999953	0.999953	Akt2/Tcf7/Appl1/Mapk1/Rac2	5
mmu00380	mmu00380	Tryptophan metabolism	572	14/1978	0.944323	0.999953	0.999953	Cat/Kyat3	2
mmu00600	mmu00600	Sphingolipid metabolism	572	14/1978	0.944323	0.999953	0.999953	Sgpl1/Gba	2
mmu04550	mmu04550	Signaling pathways regulating pluripotency of stem cells	572	19/1978	0.944344	0.999953	0.999953	Akt2/Mapk11/Mapk1	3
mmu04962	mmu04962	Vasopressin-regulated water reabsorption	572	19/1978	0.944344	0.999953	0.999953	Nsf/Dynll2/Stx4a	3
mmu05213	mmu05213	Endometrial cancer	572	19/1978	0.944344	0.999953	0.999953	Akt2/Tcf7/Mapk1	3
mmu04014	mmu04014	Ras signaling pathway	572	50/1978	0.945878	0.999953	0.999953	Zap70/Akt2/Gng5/Gng5-ps/Rap1b/Rasa3/Rras2/Mapk1/Lat/Rac2	10
mmu05220	mmu05220	Chronic myeloid leukemia	572	33/1978	0.947124	0.999953	0.999953	Cblb/Akt2/Hdac1/Cdkn1b/Ctbp1/Mapk1	6
mmu04062	mmu04062	Chemokine signaling pathway	572	55/1978	0.952805	0.999953	0.999953	Akt2/Gng5/Gng5-ps/Rap1b/Gnai3/Ptk2b/Vav1/Gnai2/Mapk1/Rac2/Gsk3a	11
mmu00100	mmu00100	Steroid biosynthesis	572	1978-09-01	0.954016	0.999953	0.999953	Cyp51	1
mmu04976	mmu04976	Bile secretion	572	1978-09-01	0.954016	0.999953	0.999953	Atp1b3	1
mmu04540	mmu04540	Gap junction	572	20/1978	0.956755	0.999953	0.999953	Gnai3/Gnai2/Mapk1	3
mmu00561	mmu00561	Glycerolipid metabolism	572	15/1978	0.958112	0.999953	0.999953	Gk/Dgat1	2
mmu04137	mmu04137	Mitophagy - animal	572	25/1978	0.958496	0.999953	0.999953	Fundc1/Rras2/Fis1/Tomm7	4
mmu04066	mmu04066	HIF-1 signaling pathway	572	43/1978	0.958498	0.999953	0.999953	Hk2/Pgk1/Pfkl/Akt2/Ldha/Aldoa/Cdkn1b/Mapk1	8
mmu00280	mmu00280	Valine, leucine and isoleucine degradation	572	30/1978	0.961475	0.999953	0.999953	Dld/Hmgcl/Hmgcs1/Acadm/Aldh6a1	5
mmu04310	mmu04310	Wnt signaling pathway	572	30/1978	0.961475	0.999953	0.999953	Ruvbl1/Tcf7/Ctbp1/Cacybp/Rac2	5
mmu04144	mmu04144	Endocytosis	572	109/1978	0.962155	0.999953	0.999953	Hspa8/Cblb/Chmp1a/Chmp4b/Ehd3/Rab8a/Arf5/Pml/Washc2/Rab35/Sh3kbp1/Snx2/Ist1/Ehd4/Washc4/Vps37b/Vps35/Vps29/Il2rg/Eps15/Stambp/Snx5/Snx6/Dnm3	24
mmu04380	mmu04380	Osteoclast differentiation	572	35/1978	0.964877	0.999953	0.999953	Lck/Junb/Akt2/Mapk11/Mapk1/Tab1	6
mmu00480	mmu00480	Glutathione metabolism	572	21/1978	0.966537	0.999953	0.999953	Gsr/Lap3/Gstm1	3
mmu04623	mmu04623	Cytosolic DNA-sensing pathway	572	21/1978	0.966537	0.999953	0.999953	Polr1c/Polr2h/Polr2e	3
mmu04912	mmu04912	GnRH signaling pathway	572	21/1978	0.966537	0.999953	0.999953	Ptk2b/Mapk11/Mapk1	3
mmu04620	mmu04620	Toll-like receptor signaling pathway	572	26/1978	0.967215	0.999953	0.999953	Akt2/Mapk11/Mapk1/Tab1	4
mmu01523	mmu01523	Antifolate resistance	572	1978-10-01	0.967375	0.999953	0.999953	Atic	1
mmu04136	mmu04136	Autophagy - other	572	1978-10-01	0.967375	0.999953	0.999953	Pik3c3	1
mmu04530	mmu04530	Tight junction	572	53/1978	0.967725	0.999953	0.999953	Actb/Map3k5/Msn/Rab8a/Scrib/Rapgef2/Prkaa1/Actn1/Dlg1/Tjp2	10
mmu04918	mmu04918	Thyroid hormone synthesis	572	16/1978	0.968595	0.999953	0.999953	Gsr/Atp1b3	2
mmu05218	mmu05218	Melanoma	572	16/1978	0.968595	0.999953	0.999953	Akt2/Mapk1	2
mmu04114	mmu04114	Oocyte meiosis	572	49/1978	0.969502	0.999953	0.999953	Smc1a/Ppp1cc/Gm5601/Slk/Rps6ka3/Ppp1ca/Anapc7/Mapk1/Smc3	9
mmu04218	mmu04218	Cellular senescence	572	58/1978	0.971586	0.999953	0.999953	Akt2/Ppid/Mapk11/Ppp1cc/Gm5601/Foxo1/Ppp1ca/Rras2/Mapk1/Rbbp4/Atm	11
mmu04917	mmu04917	Prolactin signaling pathway	572	22/1978	0.974206	0.999953	0.999953	Akt2/Mapk11/Mapk1	3
mmu05134	mmu05134	Legionellosis	572	22/1978	0.974206	0.999953	0.999953	Hspa8/Casp7/Eef1g	3
mmu04141	mmu04141	Protein processing in endoplasmic reticulum	572	92/1978	0.97486	0.999953	0.999953	Hspa8/Hsph1/Map3k5/Sec61g/Gm4184/LOC102637269/Dad1/Nsfl1c/Hsp90aa1/Dnajb1/P4hb/Plaa/Stt3a/Dnaja1/Rrbp1/Sec61b/Prkcsh/Man1a/Derl1	19
mmu04115	mmu04115	p53 signaling pathway	572	17/1978	0.976529	0.999953	0.999953	Serpinb5/Atm	2
mmu05020	mmu05020	Prion diseases	572	1978-11-01	0.976857	0.999953	0.999953	Mapk1	1
mmu04210	mmu04210	Apoptosis	572	64/1978	0.978959	0.999953	0.999953	Ctsl/Actb/Akt2/Casp6/Map3k5/Dffa/Dffb/Casp7/Lmnb1/Lmnb2/Mapk1/Atm	12
mmu04012	mmu04012	ErbB signaling pathway	572	28/1978	0.979777	0.999953	0.999953	Cblb/Akt2/Cdkn1b/Mapk1	4
mmu05226	mmu05226	Gastric cancer	572	28/1978	0.979777	0.999953	0.999953	Akt2/Tcf7/Cdkn1b/Mapk1	4
mmu04722	mmu04722	Neurotrophin signaling pathway	572	38/1978	0.98151	0.999953	0.999953	Akt2/Rap1b/Mapk11/Map3k5/Rps6ka3/Mapk1	6
mmu05166	mmu05166	HTLV-I infection	572	78/1978	0.983027	0.999953	0.999953	Cd3d/Lck/Cd3g/Cd3e/Akt2/Crtc3/Itgal/Nfyb/Il2/Anapc7/Il2rg/Rras2/Atm/Dlg1/Ranbp3	15
mmu00900	mmu00900	Terpenoid backbone biosynthesis	572	1978-12-01	0.983587	0.999953	0.999953	Hmgcs1	1
mmu03440	mmu03440	Homologous recombination	572	1978-12-01	0.983587	0.999953	0.999953	Atm	1
mmu04911	mmu04911	Insulin secretion	572	1978-12-01	0.983587	0.999953	0.999953	Atp1b3	1
mmu04920	mmu04920	Adipocytokine signaling pathway	572	24/1978	0.984832	0.999953	0.999953	Akt2/Acsl3/Prkaa1	3
mmu05200	mmu05200	Pathways in cancer	572	116/1978	0.985234	0.999953	0.999953	Tpr/Cblb/Akt2/Gng5/Gng5-ps/Gnai3/Gstm1/Tpm3/Tcf7/Pml/Appl1/Foxo1/Hdac1/Il2/Hsp90aa1/Cdkn1b/Casp7/Ctbp1/Gnai2/Gna13/Il2rg/Stat6/Mapk1/Rac2	24
mmu04217	mmu04217	Necroptosis	572	54/1978	0.988355	0.999953	0.999953	Chmp1a/Ppid/Chmp4b/H2afy/Hsp90aa1/H2afx/Hmgb1/Gm21596/Stat6	9
mmu05164	mmu05164	Influenza A	572	54/1978	0.988355	0.999953	0.999953	Actb/Hspa8/Akt2/Mapk11/Pml/Ddx39b/Dnajb1/Mapk1/Agfg1	9
mmu05206	mmu05206	MicroRNAs in cancer	572	36/1978	0.990313	0.999953	0.999953	Dnmt3a/Cdkn1b/Hnrnpk/Serpinb5/Atm	5
mmu05146	mmu05146	Amoebiasis	572	20/1978	0.990359	0.999953	0.999953	Serpinb1a/Actn1	2
mmu05211	mmu05211	Renal cell carcinoma	572	26/1978	0.99119	0.999953	0.999953	Akt2/Rap1b/Mapk1	3
mmu04979	mmu04979	Cholesterol metabolism	572	14/1978	0.99175	0.999953	0.999953	Npc2	1
mmu05100	mmu05100	Bacterial invasion of epithelial cells	572	37/1978	0.99239	0.999953	0.999953	Actb/Cblb/Rhog/Wasf2/Dnm3	5
mmu05214	mmu05214	Glioma	572	21/1978	0.992867	0.999953	0.999953	Akt2/Mapk1	2
mmu05212	mmu05212	Pancreatic cancer	572	27/1978	0.993313	0.999953	0.999953	Akt2/Mapk1/Rac2	3
mmu05224	mmu05224	Breast cancer	572	27/1978	0.993313	0.999953	0.999953	Akt2/Tcf7/Mapk1	3
mmu04120	mmu04120	Ubiquitin mediated proteolysis	572	57/1978	0.993686	0.999953	0.999953	Uba1/Cblb/Ube2m/Ube2n/Pml/Ube2o/Prpf19/Anapc7/Huwe1	9
mmu00062	mmu00062	Fatty acid elongation	572	15/1978	0.994153	0.999953	0.999953	Ppt2	1
mmu00250	mmu00250	Alanine, aspartate and glutamate metabolism	572	15/1978	0.994153	0.999953	0.999953	Got2	1
mmu04350	mmu04350	TGF-beta signaling pathway	572	15/1978	0.994153	0.999953	0.999953	Mapk1	1
mmu00310	mmu00310	Lysine degradation	572	16/1978	0.995857	0.999953	0.999953	Dlst	1
mmu01212	mmu01212	Fatty acid metabolism	572	29/1978	0.996177	0.999953	0.999953	Acsl3/Ppt2/Acadm	3
mmu04215	mmu04215	Apoptosis - multiple species	572	17/1978	0.997065	0.999953	0.999953	Casp7	1
mmu01521	mmu01521	EGFR tyrosine kinase inhibitor resistance	572	24/1978	0.997144	0.999953	0.999953	Akt2/Mapk1	2
mmu05223	mmu05223	Non-small cell lung cancer	572	24/1978	0.997144	0.999953	0.999953	Akt2/Mapk1	2
mmu04151	mmu04151	PI3K-Akt signaling pathway	572	66/1978	0.997465	0.999953	0.999953	Akt2/Gng5/Gng5-ps/Eif4b/Il2/Hsp90aa1/Cdkn1b/Il2rg/Mapk1/Prkaa1	10
mmu00071	mmu00071	Fatty acid degradation	572	25/1978	0.997902	0.999953	0.999953	Acsl3/Acadm	2
mmu00970	mmu00970	Aminoacyl-tRNA biosynthesis	572	25/1978	0.997902	0.999953	0.999953	Dars2/Rars2	2
mmu05169	mmu05169	Epstein-Barr virus infection	572	90/1978	0.997998	0.999953	0.999953	Hspa8/Akt2/Mapk11/Psmd4/Itgal/Hdac1/Ptma/Cdkn1b/Polr1c/Polr2h/Gtf2e1/Tab1/Polr2b/Spn/Polr2e	15
mmu03050	mmu03050	Proteasome	572	38/1978	0.998493	0.999953	0.999953	Psmb5/Psme3/Psmb6/Psmd4	4
mmu05222	mmu05222	Small cell lung cancer	572	27/1978	0.998873	0.999953	0.999953	Akt2/Cdkn1b	2
mmu05160	mmu05160	Hepatitis C	572	40/1978	0.999128	0.999953	0.999953	Psme3/Akt2/Mapk11/Mapk1	4
mmu03420	mmu03420	Nucleotide excision repair	572	21/1978	0.999262	0.999953	0.999953	Ccnh	1
mmu04622	mmu04622	RIG-I-like receptor signaling pathway	572	29/1978	0.999398	0.999953	0.999953	Mapk11/Pin1	2
mmu05161	mmu05161	Hepatitis B	572	53/1978	0.999491	0.999953	0.999953	Akt2/Ptk2b/Cdkn1b/Stat6/Mapk1/Atp6ap1	6
mmu05165	mmu05165	Human papillomavirus infection	572	74/1978	0.999565	0.999953	0.999953	Akt2/Pkm/Tcf7/Scrib/Foxo1/Hdac1/Cdkn1b/Mapk1/Atm/Dlg1	10
mmu05167	mmu05167	Kaposi's sarcoma-associated herpesvirus infection	572	57/1978	0.99982	0.999953	0.999953	Akt2/Gng5/Gng5-ps/Mapk11/Mapk1/Pik3c3	6
mmu04621	mmu04621	NOD-like receptor signaling pathway	572	62/1978	0.999953	0.999953	0.999953	Txnip/Mapk11/Hsp90aa1/Gbp3/Mapk1/Tab1	6

## Sheet: Fig3b-iTreghigh
	ID	Description	hits	BgRatio	pvalue	p.adjust	qvalue	geneID	Count
mmu01212	mmu01212	Fatty acid metabolism	479	29/1978	1.39523e-05	0.00406012	0.00364228	Acaa2/Acat2/Acsl5/Acads/Hadh/Acadsb/Cpt2/Cpt1a/Echs1/Hacd3/Fasn/Acadvl/Acaca/Elovl5/Mcat/Tecr/Oxsm/Mecr	18
mmu01100	mmu01100	Metabolic pathways	479	457/1978	0.000130203	0.0189446	0.016995	Cad/Hmox2/Comt/Tk1/Tyms/Rrm2/Ass1/Mthfd2/Eno3/Glud1/Adssl1/Oat/Aldh2/Sqle/Pold1/Sms/Sms-ps/Ckb/Gcdh/Asns/Pafah1b3/Phgdh/Ahcyl2/Inpp4b/Pck2/Acaa2/Acat2/Pygb/Acsl5/Cth/Impa2/Hlcs/Psat1/Aco2/Nampt/Hibadh/Psph/Pgls/Mtap/Mri1/Cs/Cndp2/Prps1/Sacm1l/Ivd/Akr1a1/Dguok/Ak2/Aldh18a1/Degs1/Bcat2/Dhcr7/Dgka/Gpi1/Mdh2/Alad/Dnmt1/Glb1/Lta4h/Impdh2/Scp2/Adss/Atp5b/Dtymk/Acads/Hadh/Ahcyl1/Bdh1/Idi2/Lss/Gne/Ugp2/C…	141
mmu00250	mmu00250	Alanine, aspartate and glutamate metabolism	479	15/1978	0.000574897	0.0435065	0.0390292	Cad/Ass1/Glud1/Adssl1/Asns/Adss/Got1/Adsl/Nit2/Gfpt1	10
mmu00970	mmu00970	Aminoacyl-tRNA biosynthesis	479	25/1978	0.000598027	0.0435065	0.0390292	Wars/Mars/Aars/Gars/Cars/Vars/Iars2/Lars/Nars/Iars/Tars/Farsa/Dars/Kars	14
mmu00071	mmu00071	Fatty acid degradation	479	25/1978	0.00233575	0.133184	0.119478	Eci1/Aldh2/Gcdh/Acaa2/Acat2/Acsl5/Acads/Hadh/Acadsb/Cpt2/Cpt1a/Echs1/Acadvl	13
mmu04621	mmu04621	NOD-like receptor signaling pathway	479	62/1978	0.00317894	0.133184	0.119478	Casp1/Traf6/Tmem173/Mavs/Nampt/Vdac2/Mapk3/Atg5/Nek7/Casp8/Nfkb1/Mapk14/Mcu/Sharpin/Gsdmd/Nfkbia/Bcl2/Txn1/Txn2/Atg12/Pycard/Trpv2/Gbp2/Ikbkg/Irf3	25
mmu00062	mmu00062	Fatty acid elongation	479	15/1978	0.00320374	0.133184	0.119478	Acaa2/Hadh/Acot7/Echs1/Hacd3/Elovl5/Tecr/Mecr/Elovl1	9
mmu00280	mmu00280	Valine, leucine and isoleucine degradation	479	30/1978	0.0057119	0.178187	0.15985	Aldh2/Acaa2/Acat2/Hibadh/Aacs/Ivd/Bcat2/Acads/Hadh/Oxct1/Acadsb/Echs1/Hibch/Pccb	14
mmu00650	mmu00650	Butanoate metabolism	479	1978-11-01	0.00612328	0.178187	0.15985	Acat2/Aacs/Acads/Hadh/Bdh1/Oxct1/Echs1	7
mmu04340	mmu04340	Hedgehog signaling pathway	479	1978-11-01	0.00612328	0.178187	0.15985	Prkacb/Arrb2/Grk2/Gsk3b/Bcl2/Cul1/Prkaca	7
mmu00100	mmu00100	Steroid biosynthesis	479	1978-09-01	0.0083255	0.200601	0.179956	Sqle/Dhcr7/Lss/Nsdhl/Soat1/Ebp	6
mmu05161	mmu05161	Hepatitis B	479	53/1978	0.00845722	0.200601	0.179956	Stat3/Casp3/Mavs/Ddb2/Ccna2/Ddb1/Mapk3/Birc5/Casp8/Tgfb1/Nfkb1/Ywhaz/Nfkbia/Bcl2/Cdk4/Prkcb/Cdk2/Cdk6/Ikbkg/Pcna/Irf3	21
mmu04115	mmu04115	p53 signaling pathway	479	17/1978	0.00968415	0.200601	0.179956	Rrm2/Ccnb1/Casp3/Ddb2/Casp8/Cdk1/Cdk4/Cdk2/Cdk6	9
mmu03050	mmu03050	Proteasome	479	38/1978	0.010749	0.200601	0.179956	Psmb10/Psme1/Psme2/Psme2b/Psmb8/Psmb3/Psmd7/Psma2/Psmb4/Psma1/Psmd14/Psmc4/Psmd12/Psma6/Psma4/Psma5	16
mmu00061	mmu00061	Fatty acid biosynthesis	479	1978-07-01	0.0110296	0.200601	0.179956	Acsl5/Fasn/Acaca/Mcat/Oxsm	5
mmu04740	mmu04740	Olfactory transduction	479	1978-07-01	0.0110296	0.200601	0.179956	Prkacb/Camk2d/Arrb2/Grk2/Prkaca	5
mmu05222	mmu05222	Small cell lung cancer	479	27/1978	0.0162361	0.277924	0.249322	Traf6/Casp3/Itga6/Ddb2/Nfkb1/Nfkbia/Bcl2/Cdk4/Cks1b/Cdk2/Cdk6/Ikbkg	12
mmu04530	mmu04530	Tight junction	479	53/1978	0.0182478	0.281231	0.252289	Tuba1b/Prkacb/Slc9a3r1/Myl9/Rab8b/Tuba4a/Vasp/Myl6/Ppp2r2a/Myh9/Hcls1/Myl12b/Ppp2r1b/Ezr/Cdk4/Ppp2r2d/Ybx3/Prkaca/Pcna/Tubal3	20
mmu05414	mmu05414	Dilated cardiomyopathy (DCM)	479	16/1978	0.0220608	0.281231	0.252289	Emd/Itgb7/Prkacb/Itga6/Tgfb1/Tpm4/Atp2a2/Prkaca	8
mmu00270	mmu00270	Cysteine and methionine metabolism	479	28/1978	0.022344	0.281231	0.252289	Sms/Sms-ps/Ahcyl2/Cth/Mtap/Mri1/Bcat2/Mdh2/Dnmt1/Ahcyl1/Got1/Gss	12
mmu01200	mmu01200	Carbon metabolism	479	78/1978	0.0229088	0.281231	0.252289	Eno3/Glud1/Phgdh/Acat2/Psat1/Aco2/Psph/Pgls/Cs/Prps1/Esd/Gpi1/Mdh2/Acads/Got1/Eno1/Eno1b/Tkt/Echs1/H6pd/Sdha/Gcsh/Me2/Shmt1/Hibch/Fh1/Pccb	27
mmu00330	mmu00330	Arginine and proline metabolism	479	19/1978	0.0229827	0.281231	0.252289	Oat/Aldh2/Sms/Sms-ps/Ckb/Cndp2/Aldh18a1/Got1/Pycr2	9
mmu04962	mmu04962	Vasopressin-regulated water reabsorption	479	19/1978	0.0229827	0.281231	0.252289	Prkacb/Rab5c/Dctn2/Dync1h1/Dync1li1/Dctn1/Dync1i2/Prkaca/Dctn4	9
mmu05134	mmu05134	Legionellosis	479	22/1978	0.0231943	0.281231	0.252289	Sec22b/Casp1/Casp3/Casp8/Nfkb1/Nfkbia/Eef1a1/Hspd1/Rab1b/Pycard	10
mmu04622	mmu04622	RIG-I-like receptor signaling pathway	479	29/1978	0.0299949	0.291015	0.261066	Traf6/Tmem173/Mavs/Atg5/Casp8/Nfkb1/Mapk14/Nfkbia/Sike1/Atg12/Ikbkg/Irf3	12
mmu04612	mmu04612	Antigen processing and presentation	479	26/1978	0.0313251	0.291015	0.261066	Tap1/Tap2/Psme1/Psme2/Psme2b/Calr/Ifi30/H2-K1/Pdia3/Canx/B2m	11
mmu00260	mmu00260	Glycine, serine and threonine metabolism	479	14/1978	0.0319799	0.291015	0.261066	Phgdh/Cth/Psat1/Psph/Gcsh/Shmt1/Grhpr	7
mmu05032	mmu05032	Morphine addiction	479	14/1978	0.0319799	0.291015	0.261066	Prkacb/Gng2/Gnb2/Arrb2/Grk2/Prkcb/Prkaca	7
mmu04114	mmu04114	Oocyte meiosis	479	49/1978	0.0324247	0.291015	0.261066	Ccnb1/Prkacb/Plk1/Camk2d/Ppp3cb/Aurka/Mapk3/Ywhae/Ywhaz/Ywhah/Ppp2r1b/Mad2l1/Cdc27/Cdk1/Cdk2/Anapc5/Cul1/Prkaca	18
mmu00630	mmu00630	Glyoxylate and dicarboxylate metabolism	479	17/1978	0.0330623	0.291015	0.261066	Acat2/Aco2/Cs/Mdh2/Gcsh/Shmt1/Grhpr/Pccb	8
mmu04540	mmu04540	Gap junction	479	20/1978	0.03307	0.291015	0.261066	Tuba1b/Prkacb/Tuba4a/Tubb5/Mapk3/Cdk1/Prkcb/Prkaca/Tubal3	9
mmu00760	mmu00760	Nicotinate and nicotinamide metabolism	479	1978-06-01	0.0333935	0.291015	0.261066	Nampt/Nt5c2/Nt5e/Nt5c3	4
mmu04512	mmu04512	ECM-receptor interaction	479	1978-06-01	0.0333935	0.291015	0.261066	Itgb7/Cd47/Itga6/Hmmr	4
mmu04914	mmu04914	Progesterone-mediated oocyte maturation	479	36/1978	0.0346793	0.291015	0.261066	Ccnb1/Prkacb/Plk1/Ccna2/Aurka/Kif22/Mapk3/Mapk14/Mad2l1/Cdc27/Cdk1/Cdk2/Anapc5/Prkaca	14
mmu01230	mmu01230	Biosynthesis of amino acids	479	46/1978	0.0350018	0.291015	0.261066	Ass1/Eno3/Phgdh/Cth/Psat1/Aco2/Psph/Cs/Prps1/Aldh18a1/Bcat2/Got1/Eno1/Eno1b/Tkt/Shmt1/Pycr2	17
mmu05160	mmu05160	Hepatitis C	479	40/1978	0.0407047	0.323378	0.290099	Stat3/Traf6/Mavs/Cd81/Mapk3/Ppp2r2a/Eif2s1/Nfkb1/Mapk14/Ppp2r1b/Gsk3b/Nfkbia/Ppp2r2d/Ikbkg/Irf3	15
mmu04964	mmu04964	Proximal tubule bicarbonate reclamation	479	1978-09-01	0.0427049	0.323378	0.290099	Car2/Glud1/Pck2/Slc25a10/Atp1b1	5
mmu03420	mmu03420	Nucleotide excision repair	479	21/1978	0.0458467	0.323378	0.290099	Pold1/Ddb2/Ddb1/Rfc2/Rad23b/Rpa1/Cul4b/Cul4a/Pcna	9
mmu04623	mmu04623	Cytosolic DNA-sensing pathway	479	21/1978	0.0458467	0.323378	0.290099	Casp1/Tmem173/Mavs/Nfkb1/Trex1/Nfkbia/Pycard/Ikbkg/Irf3	9
mmu00563	mmu00563	Glycosylphosphatidylinositol (GPI)-anchor biosynthesis	479	1978-04-01	0.0463162	0.323378	0.290099	Pigs/Pigu/Pigt	3
mmu05145	mmu05145	Toxoplasmosis	479	34/1978	0.0471454	0.323378	0.290099	Stat3/Traf6/Casp3/Irgm1/Itga6/Mapk3/Casp8/Tgfb1/Nfkb1/Mapk14/Nfkbia/Bcl2/Ikbkg	13
mmu05140	mmu05140	Leishmaniasis	479	18/1978	0.0472728	0.323378	0.290099	Ptpn6/Traf6/Mapk3/Tgfb1/Nfkb1/Mapk14/Nfkbia/Prkcb	8
mmu04971	mmu04971	Gastric acid secretion	479	15/1978	0.0477844	0.323378	0.290099	Car2/Prkacb/Camk2d/Atp1b1/Ezr/Prkcb/Prkaca	7
mmu04728	mmu04728	Dopaminergic synapse	479	41/1978	0.0504014	0.333336	0.299032	Comt/Prkacb/Camk2d/Ppp3cb/Gng2/Ppp2r2a/Mapk14/Gnb2/Kif5b/Ppp2r1b/Arrb2/Gsk3b/Prkcb/Ppp2r2d/Prkaca	15
mmu04657	mmu04657	IL-17 signaling pathway	479	28/1978	0.0542225	0.350639	0.314554	Traf6/Casp3/Mapk3/Casp8/Hsp90b1/Nfkb1/Mapk14/Gsk3b/Nfkbia/Anapc5/Ikbkg	11
mmu04151	mmu04151	PI3K-Akt signaling pathway	479	66/1978	0.056852	0.359651	0.322639	Itgb7/Itga6/Pck2/Il2ra/Gng2/Mapk3/Ppp2r2a/Hsp90b1/Nfkb1/Ywhae/Gnb2/Ywhaz/Ywhah/Ppp2r1b/Gsk3b/Bcl2/Cdk4/Cdk2/Cdk6/Ppp2r2d/Gys1/Ikbkg	22
mmu00780	mmu00780	Biotin metabolism	479	1978-02-01	0.0585505	0.362515	0.325208	Hlcs/Oxsm	2
mmu04961	mmu04961	Endocrine and other factor-regulated calcium reabsorption	479	16/1978	0.0677916	0.39644	0.355642	Prkacb/Atp1b1/Cltc/Ap2b1/Prkcb/Prkaca/Dnm2	7
mmu01523	mmu01523	Antifolate resistance	479	1978-10-01	0.0688082	0.39644	0.355642	Tyms/Izumo1r/Nfkb1/Shmt1/Ikbkg	5
mmu00410	mmu00410	beta-Alanine metabolism	479	13/1978	0.0694792	0.39644	0.355642	Aldh2/Sms/Sms-ps/Cndp2/Echs1/Hibch	6
mmu03430	mmu03430	Mismatch repair	479	13/1978	0.0694792	0.39644	0.355642	Pold1/Msh2/Ssbp1/Rfc2/Rpa1/Pcna	6
mmu04070	mmu04070	Phosphatidylinositol signaling system	479	26/1978	0.074501	0.416919	0.374013	Inpp4b/Impa2/Sacm1l/Dgka/Cds2/Inpp5d/Pip4k2a/Dgkz/Prkcb/Cdipt	10
mmu04218	mmu04218	Cellular senescence	479	58/1978	0.0857953	0.455655	0.408762	Capn2/Ccnb1/Ppp3cb/Ccna2/Vdac2/Mapk3/H2-K1/Tgfb1/Nfkb1/Mapk14/Slc25a5/Mcu/Mre11a/Sqstm1/Cdk1/Cdk4/Cdk2/Cdk6/Rassf5	19
mmu00564	mmu00564	Glycerophospholipid metabolism	479	20/1978	0.086184	0.455655	0.408762	Dgka/Cds2/Lypla2/Dgkz/Agpat5/Cdipt/Gpd1l/Mboat7	8
mmu05133	mmu05133	Pertussis	479	20/1978	0.086184	0.455655	0.408762	Casp1/Traf6/Casp3/Mapk3/Nfkb1/Mapk14/Pycard/Irf3	8
mmu04110	mmu04110	Cell cycle	479	51/1978	0.0876861	0.455655	0.408762	Ccnb1/Plk1/Ccna2/Tgfb1/Ywhae/Ywhaz/Ywhah/Gsk3b/Mad2l1/Cdc27/Cdk1/Cdk4/Cdk2/Cdk6/Anapc5/Cul1/Pcna	17
mmu04713	mmu04713	Circadian entrainment	479	17/1978	0.0921021	0.470206	0.421816	Prkacb/Camk2d/Gng2/Mapk3/Gnb2/Prkcb/Prkaca	7
mmu03460	mmu03460	Fanconi anemia pathway	479	1978-05-01	0.0951604	0.473378	0.424662	Rpa1/Fanci/Rad51	3
mmu03320	mmu03320	PPAR signaling pathway	479	14/1978	0.0976037	0.473378	0.424662	Pck2/Acsl5/Scp2/Cpt2/Cpt1a/Fabp5	6
mmu04060	mmu04060	Cytokine-cytokine receptor interaction	479	14/1978	0.0976037	0.473378	0.424662	Tnfrsf18/Il2ra/Tgfb1/Ccr7/Il18r1/Ccl1	6
mmu04020	mmu04020	Calcium signaling pathway	479	24/1978	0.102057	0.482584	0.432921	Prkacb/Camk2d/Ppp3cb/Vdac2/Slc25a5/Mcu/Prkcb/Atp2a2/Prkaca	9
mmu01040	mmu01040	Biosynthesis of unsaturated fatty acids	479	1978-08-01	0.102819	0.482584	0.432921	Acot7/Hacd3/Elovl5/Tecr	4
mmu04931	mmu04931	Insulin resistance	479	38/1978	0.10621	0.490589	0.440102	Stat3/Ptpa/Pck2/Pygb/Ptpn1/Ogt/Nfkb1/Cpt1a/Gsk3b/Nfkbia/Prkcb/Gys1/Gfpt1	13
mmu00520	mmu00520	Amino sugar and nucleotide sugar metabolism	479	28/1978	0.115782	0.521039	0.467418	Cyb5r3/Gpi1/Amdhd2/Gne/Ugp2/Hexa/Uxs1/Mpi/Pgm3/Gfpt1	10
mmu05142	mmu05142	Chagas disease (American trypanosomiasis)	479	35/1978	0.116383	0.521039	0.467418	Traf6/Calr/Mapk3/Ppp2r2a/Casp8/Tgfb1/Nfkb1/Mapk14/Ppp2r1b/Nfkbia/Ppp2r2d/Ikbkg	12
mmu04925	mmu04925	Aldosterone synthesis and secretion	479	18/1978	0.12063	0.531868	0.477133	Prkacb/Camk2d/Prkd2/Atp1b1/Lipe/Prkcb/Prkaca	7
mmu04261	mmu04261	Adrenergic signaling in cardiomyocytes	479	36/1978	0.138157	0.549854	0.493268	Prkacb/Camk2d/Atp1b1/Mapk3/Ppp2r2a/Mapk14/Ppp2r1b/Bcl2/Tpm4/Ppp2r2d/Atp2a2/Prkaca	12
mmu05132	mmu05132	Salmonella infection	479	36/1978	0.138157	0.549854	0.493268	Casp1/Pfn2/Pfn1/Mapk3/Arpc5/Dync1h1/Nfkb1/Mapk14/Dync1li1/Dync1i2/Pycard/Arpc1a	12
mmu05206	mmu05206	MicroRNAs in cancer	479	36/1978	0.138157	0.549854	0.493268	Vim/Stat3/Stmn1/Casp3/Pdcd4/Dnmt1/Nfkb1/Bcl2/Ezr/Prkcb/Slc7a1/Cdk6	12
mmu03440	mmu03440	Homologous recombination	479	1978-12-01	0.141228	0.549854	0.493268	Pold1/Ssbp1/Mre11a/Rpa1/Rad51	5
mmu04911	mmu04911	Insulin secretion	479	1978-12-01	0.141228	0.549854	0.493268	Prkacb/Camk2d/Atp1b1/Prkcb/Prkaca	5
mmu05321	mmu05321	Inflammatory bowel disease (IBD)	479	1978-12-01	0.141228	0.549854	0.493268	Stat3/Foxp3/Tgfb1/Nfkb1/Il18r1	5
mmu04141	mmu04141	Protein processing in endoplasmic reticulum	479	92/1978	0.146695	0.549854	0.493268	Capn2/Nploc4/Fbxo2/Txndc5/Dnajc10/Calr/Sec31a/Eif2s1/Ubqln1/Ngly1/Hsp90b1/Pdia3/Canx/Rad23b/Uggt1/Ubqln4/Ssr1/Rpn2/Lman2/Ssr3/Dnaja2/Sel1l/Bcl2/Dnajc3/Sil1/Cul1/Stub1	27
mmu00471	mmu00471	D-Glutamine and D-glutamate metabolism	479	1978-03-01	0.147384	0.549854	0.493268	Glud1/Dglucy	2
mmu00603	mmu00603	Glycosphingolipid biosynthesis - globo and isoglobo series	479	1978-03-01	0.147384	0.549854	0.493268	Hexa/Naga	2
mmu00910	mmu00910	Nitrogen metabolism	479	1978-03-01	0.147384	0.549854	0.493268	Car2/Glud1	2
mmu04742	mmu04742	Taste transduction	479	1978-03-01	0.147384	0.549854	0.493268	Prkacb/Prkaca	2
mmu04913	mmu04913	Ovarian steroidogenesis	479	1978-03-01	0.147384	0.549854	0.493268	Prkacb/Prkaca	2
mmu04976	mmu04976	Bile secretion	479	1978-09-01	0.15091	0.550191	0.49357	Car2/Prkacb/Atp1b1/Prkaca	4
mmu04726	mmu04726	Serotonergic synapse	479	19/1978	0.153117	0.550191	0.49357	Prkacb/Casp3/Gng2/Mapk3/Gnb2/Prkcb/Prkaca	7
mmu00072	mmu00072	Synthesis and degradation of ketone bodies	479	1978-06-01	0.156927	0.550191	0.49357	Acat2/Bdh1/Oxct1	3
mmu04940	mmu04940	Type I diabetes mellitus	479	1978-06-01	0.156927	0.550191	0.49357	Gzmb/H2-K1/Hspd1	3
mmu05144	mmu05144	Malaria	479	1978-06-01	0.156927	0.550191	0.49357	Cd81/Tgfb1/Pecam1	3
mmu05200	mmu05200	Pathways in cancer	479	116/1978	0.162113	0.561606	0.50381	Stat3/Prkacb/Traf6/Casp3/Arhgef1/Itga6/Camk2d/Ddb2/Gsto1/Il2ra/Msh2/Gng2/Mapk3/Birc5/Casp8/Tgfb1/Hsp90b1/Nfkb1/Gnb2/Gsk3b/Nfkbia/Bcl2/Cdk4/Cks1b/Prkcb/Cdk2/Cdk6/Cul1/Ikbkg/Prkaca/Fh1/Rad51/Rassf5	33
mmu04662	mmu04662	B cell receptor signaling pathway	479	30/1978	0.167483	0.564043	0.505996	Ptpn6/Cd81/Ppp3cb/Mapk3/Inpp5d/Nfkb1/Gsk3b/Nfkbia/Prkcb/Ikbkg	10
mmu04916	mmu04916	Melanogenesis	479	16/1978	0.168631	0.564043	0.505996	Prkacb/Camk2d/Mapk3/Gsk3b/Prkcb/Prkaca	6
mmu04918	mmu04918	Thyroid hormone synthesis	479	16/1978	0.168631	0.564043	0.505996	Prkacb/Atp1b1/Hsp90b1/Canx/Prkcb/Prkaca	6
mmu04724	mmu04724	Glutamatergic synapse	479	23/1978	0.170762	0.564679	0.506567	Prkacb/Ppp3cb/Gng2/Mapk3/Gnb2/Grk2/Prkcb/Prkaca	8
mmu05212	mmu05212	Pancreatic cancer	479	27/1978	0.185059	0.595019	0.533784	Stat3/Ddb2/Mapk3/Tgfb1/Nfkb1/Cdk4/Cdk6/Ikbkg/Rad51	9
mmu00983	mmu00983	Drug metabolism - other enzymes	479	13/1978	0.186071	0.595019	0.533784	Tk1/Impdh2/Hprt/Upp1/Xdh	5
mmu05031	mmu05031	Amphetamine addiction	479	13/1978	0.186071	0.595019	0.533784	Prkacb/Camk2d/Ppp3cb/Prkcb/Prkaca	5
mmu05146	mmu05146	Amoebiasis	479	20/1978	0.189157	0.598312	0.536739	Prkacb/Casp3/Rab5c/Tgfb1/Nfkb1/Prkcb/Prkaca	7
mmu05167	mmu05167	Kaposi's sarcoma-associated herpesvirus infection	479	57/1978	0.196691	0.615453	0.552115	Stat3/Casp3/Ppp3cb/Gng2/Mapk3/Prex1/Casp8/H2-K1/Nfkb1/Mapk14/Gnb2/Gsk3b/Nfkbia/Cdk4/Cdk6/Ikbkg/Irf3	17
mmu00620	mmu00620	Pyruvate metabolism	479	24/1978	0.205114	0.631124	0.566174	Aldh2/Pck2/Acat2/Mdh2/Me2/Acaca/Grhpr/Fh1	8
mmu04215	mmu04215	Apoptosis - multiple species	479	17/1978	0.210375	0.631124	0.566174	Casp3/Htra2/Birc5/Casp8/Diablo/Bcl2	6
mmu04727	mmu04727	GABAergic synapse	479	17/1978	0.210375	0.631124	0.566174	Prkacb/Gng2/Gnb2/Prkcb/Gphn/Prkaca	6
mmu05410	mmu05410	Hypertrophic cardiomyopathy (HCM)	479	17/1978	0.210375	0.631124	0.566174	Emd/Itgb7/Itga6/Tgfb1/Tpm4/Atp2a2	6
mmu04390	mmu04390	Hippo signaling pathway	479	28/1978	0.217875	0.646956	0.580376	Ppp2r2a/Birc5/Tgfb1/Ywhae/Ywhaz/Ywhah/Ppp2r1b/Gsk3b/Ppp2r2d	9
mmu04015	mmu04015	Rap1 signaling pathway	479	43/1978	0.222453	0.653877	0.586585	Fyb/Skap1/Prkd2/Pfn2/Tln1/Pfn1/Vasp/Rgs14/Mapk3/Mapk14/Prkcb/Lcp2/Rassf5	13
mmu00040	mmu00040	Pentose and glucuronate interconversions	479	1978-07-01	0.227214	0.654646	0.587275	Akr1a1/Ugp2/Cryl1	3
mmu00220	mmu00220	Arginine biosynthesis	479	1978-07-01	0.227214	0.654646	0.587275	Ass1/Glud1/Got1	3
mmu05165	mmu05165	Human papillomavirus infection	479	74/1978	0.234475	0.656256	0.58872	Itgb7/Prkacb/Slc9a3r1/Casp3/Itga6/Ccna2/Tubg1/Mapk3/Ppp2r2a/Casp8/H2-K1/Nfkb1/Ppp2r1b/Gsk3b/Cdk4/Cdk2/Cdk6/Ppp2r2d/Ikbkg/Prkaca/Irf3	21
mmu00380	mmu00380	Tryptophan metabolism	479	14/1978	0.23522	0.656256	0.58872	Aldh2/Gcdh/Acat2/Hadh/Echs1	5
mmu04979	mmu04979	Cholesterol metabolism	479	14/1978	0.23522	0.656256	0.58872	Npc1/Apob/Vdac2/Soat1/Ldlrap1	5
mmu05166	mmu05166	HTLV-I infection	479	78/1978	0.237368	0.656256	0.58872	Pold1/Prkacb/Il2ra/Calr/Tln1/Ppp3cb/Vdac2/H2-K1/Tgfb1/Nfkb1/Canx/Slc25a5/Gsk3b/Mad2l1/Nfkbia/Cdc27/Cdk4/Anapc5/Fdps/Ikbkg/Prkaca/Pcna	22
mmu04062	mmu04062	Chemokine signaling pathway	479	55/1978	0.239049	0.656256	0.58872	Stat3/Prkacb/Gng2/Mapk3/Prex1/Nfkb1/Ccr7/Gnb2/Arrb2/Grk2/Gsk3b/Nfkbia/Ccl1/Prkcb/Ikbkg/Prkaca	16
mmu04725	mmu04725	Cholinergic synapse	479	25/1978	0.241922	0.657266	0.589625	Prkacb/Camk2d/Gng2/Mapk3/Gnb2/Bcl2/Prkcb/Prkaca	8
mmu00120	mmu00120	Primary bile acid biosynthesis	479	1978-04-01	0.248451	0.657266	0.589625	Scp2/Akr1d1	2
mmu00531	mmu00531	Glycosaminoglycan degradation	479	1978-04-01	0.248451	0.657266	0.589625	Glb1/Hexa	2
mmu04672	mmu04672	Intestinal immune network for IgA production	479	1978-04-01	0.248451	0.657266	0.589625	Itgb7/Tgfb1	2
mmu00511	mmu00511	Other glycan degradation	479	1978-11-01	0.264963	0.680652	0.610605	Glb1/Aga/Hexa/Man2c1	4
mmu01210	mmu01210	2-Oxocarboxylic acid metabolism	479	1978-11-01	0.264963	0.680652	0.610605	Aco2/Cs/Bcat2/Got1	4
mmu05412	mmu05412	Arrhythmogenic right ventricular cardiomyopathy (ARVC)	479	1978-11-01	0.264963	0.680652	0.610605	Emd/Itgb7/Itga6/Atp2a2	4
mmu05100	mmu05100	Bacterial invasion of epithelial cells	479	37/1978	0.268712	0.680652	0.610605	Sept9/Sept1/Cltc/Arpc5/Hcls1/Cd2ap/Sept6/Sept2/Sept11/Dnm2/Arpc1a	11
mmu05014	mmu05014	Amyotrophic lateral sclerosis (ALS)	479	22/1978	0.269743	0.680652	0.610605	Casp1/Casp3/Ppp3cb/Nefh/Mapk14/Bcl2/Ccs	7
mmu04210	mmu04210	Apoptosis	479	64/1978	0.271325	0.680652	0.610605	Capn2/Gzmb/Tuba1b/Casp3/Tuba4a/Mapk3/Eif2s1/Htra2/Birc5/Casp8/Nfkb1/Ctsw/Diablo/Nfkbia/Bcl2/Ctsd/Ikbkg/Tubal3	18
mmu04270	mmu04270	Vascular smooth muscle contraction	479	26/1978	0.280714	0.69227	0.621027	Prkacb/Arhgef1/Myl9/Prkch/Myl6/Mapk3/Prkcb/Prkaca	8
mmu04620	mmu04620	Toll-like receptor signaling pathway	479	26/1978	0.280714	0.69227	0.621027	Traf6/Mapk3/Casp8/Nfkb1/Mapk14/Nfkbia/Ikbkg/Irf3	8
mmu00561	mmu00561	Glycerolipid metabolism	479	15/1978	0.287421	0.695716	0.624119	Aldh2/Akr1a1/Dgka/Dgkz/Agpat5	5
mmu05152	mmu05152	Tuberculosis	479	53/1978	0.287897	0.695716	0.624119	Coro1a/Hspa9/Traf6/Casp3/Camk2d/Rab5c/Ppp3cb/Mapk3/Casp8/Tgfb1/Nfkb1/Mapk14/Bcl2/Ctsd/Hspd1	15
mmu04933	mmu04933	AGE-RAGE signaling pathway in diabetic complications	479	30/1978	0.289284	0.695716	0.624119	Stat3/Casp3/Mapk3/Tgfb1/Nfkb1/Mapk14/Bcl2/Cdk4/Prkcb	9
mmu04926	mmu04926	Relaxin signaling pathway	479	34/1978	0.296136	0.697132	0.625388	Prkacb/Gng2/Mapk3/Tgfb1/Nfkb1/Mapk14/Gnb2/Arrb2/Nfkbia/Prkaca	10
mmu04810	mmu04810	Regulation of actin cytoskeleton	479	73/1978	0.300358	0.697132	0.625388	Diaph2/Itgb7/Scin/Itgae/Arhgef1/Itga6/Myl9/Pfn2/Iqgap1/Pfn1/Mapk3/Cyfip1/Myh9/Arpc5/Pip4k2a/Myl12b/Git1/Ezr/Diaph3/Arpc1a	20
mmu05418	mmu05418	Fluid shear stress and atherosclerosis	479	38/1978	0.301713	0.697132	0.625388	Ass1/Gsto1/Hsp90b1/Nfkb1/Mapk14/Sqstm1/Bcl2/Txn1/Txn2/Ikbkg/Pecam1	11
mmu00140	mmu00140	Steroid hormone biosynthesis	479	1978-08-01	0.301851	0.697132	0.625388	Comt/Akr1c18/Akr1d1	3
mmu05030	mmu05030	Cocaine addiction	479	1978-08-01	0.301851	0.697132	0.625388	Prkacb/Nfkb1/Prkaca	3
mmu00562	mmu00562	Inositol phosphate metabolism	479	23/1978	0.313048	0.709131	0.636153	Inpp4b/Impa2/Sacm1l/Inpp5d/Pip4k2a/Isyna1/Cdipt	7
mmu04750	mmu04750	Inflammatory mediator regulation of TRP channels	479	23/1978	0.313048	0.709131	0.636153	Prkacb/Camk2d/Prkch/Mapk14/Prkcb/Trpv2/Prkaca	7
mmu04145	mmu04145	Phagosome	479	54/1978	0.316104	0.709131	0.636153	Sec22b/Coro1a/Tuba1b/Tap1/Tap2/Calr/Rab5c/Tuba4a/Tubb5/Dync1h1/H2-K1/Canx/Dync1li1/Dync1i2/Tubal3	15
mmu05215	mmu05215	Prostate cancer	479	27/1978	0.32099	0.709131	0.636153	Mapk3/Hsp90b1/Nfkb1/Gsk3b/Nfkbia/Bcl2/Cdk2/Ikbkg	8
mmu00500	mmu00500	Starch and sucrose metabolism	479	1978-12-01	0.326831	0.709131	0.636153	Pygb/Gpi1/Ugp2/Gys1	4
mmu00900	mmu00900	Terpenoid backbone biosynthesis	479	1978-12-01	0.326831	0.709131	0.636153	Acat2/Idi2/Fdps/Pmvk	4
mmu05169	mmu05169	Epstein-Barr virus infection	479	90/1978	0.328071	0.709131	0.636153	Vim/Stat3/Prkacb/Traf6/Ccna2/H2-K1/Nfkb1/Psmd7/Mapk14/Ywhae/Ywhaz/Ywhah/Snd1/Gsk3b/Nfkbia/Psmd14/Bcl2/Cdk1/Psmc4/Cdk2/Psmd12/Ikbkg/Prkaca/Irf3	24
mmu04380	mmu04380	Osteoclast differentiation	479	35/1978	0.331878	0.709131	0.636153	Traf6/Ppp3cb/Mapk3/Tgfb1/Nfkb1/Mapk14/Sqstm1/Nfkbia/Lcp2/Ikbkg	10
mmu00310	mmu00310	Lysine degradation	479	16/1978	0.341417	0.709131	0.636153	Aldh2/Gcdh/Acat2/Hadh/Echs1	5
mmu04216	mmu04216	Ferroptosis	479	16/1978	0.341417	0.709131	0.636153	Slc3a2/Acsl5/Vdac2/Atg5/Gss	5
mmu00350	mmu00350	Tyrosine metabolism	479	1978-05-01	0.350645	0.709131	0.636153	Comt/Got1	2
mmu00604	mmu00604	Glycosphingolipid biosynthesis - ganglio series	479	1978-05-01	0.350645	0.709131	0.636153	Glb1/Hexa	2
mmu00730	mmu00730	Thiamine metabolism	479	1978-05-01	0.350645	0.709131	0.636153	Ak2/Acp1	2
mmu04975	mmu04975	Fat digestion and absorption	479	1978-05-01	0.350645	0.709131	0.636153	Acat2/Apob	2
mmu05320	mmu05320	Autoimmune thyroid disease	479	1978-05-01	0.350645	0.709131	0.636153	Gzmb/H2-K1	2
mmu05330	mmu05330	Allograft rejection	479	1978-05-01	0.350645	0.709131	0.636153	Gzmb/H2-K1	2
mmu05332	mmu05332	Graft-versus-host disease	479	1978-05-01	0.350645	0.709131	0.636153	Gzmb/H2-K1	2
mmu00030	mmu00030	Pentose phosphate pathway	479	20/1978	0.35091	0.709131	0.636153	Pgls/Prps1/Gpi1/Dera/Tkt/H6pd	6
mmu04920	mmu04920	Adipocytokine signaling pathway	479	24/1978	0.357491	0.712533	0.639205	Stat3/Pck2/Acsl5/Nfkb1/Cpt1a/Nfkbia/Ikbkg	7
mmu05223	mmu05223	Non-small cell lung cancer	479	24/1978	0.357491	0.712533	0.639205	Stat3/Ddb2/Mapk3/Cdk4/Prkcb/Cdk6/Rassf5	7
mmu05210	mmu05210	Colorectal cancer	479	28/1978	0.362236	0.71708	0.643284	Casp3/Ddb2/Msh2/Mapk3/Birc5/Tgfb1/Gsk3b/Bcl2	8
mmu05168	mmu05168	Herpes simplex infection	479	60/1978	0.374801	0.736916	0.661079	Tap1/Tap2/Traf6/Casp3/Mavs/Eif2s1/Srpk1/Casp8/H2-K1/Nfkb1/Nfkbia/Cdk1/Cdk2/Cul1/Ikbkg/Irf3	16
mmu04960	mmu04960	Aldosterone-regulated sodium reabsorption	479	1978-09-01	0.377321	0.736916	0.661079	Atp1b1/Mapk3/Prkcb	3
mmu04970	mmu04970	Salivary secretion	479	13/1978	0.389391	0.755419	0.677677	Prkacb/Atp1b1/Prkcb/Prkaca	4
mmu04144	mmu04144	Endocytosis	479	109/1978	0.393472	0.755613	0.677852	Bin1/Traf6/Cyth1/Il2ra/Rab5c/Capza2/Cltc/Sh3glb2/Arpc5/Vps25/Izumo1r/Git2/Ehd1/H2-K1/Capzb/Kif5b/Git1/Arrb2/Grk2/Ap2b1/Sh3glb1/Pdcd6ip/Igf2r/Cyth4/Ldlrap1/Vps36/Dnm2/Arpc1a	28
mmu04912	mmu04912	GnRH signaling pathway	479	21/1978	0.399981	0.755613	0.677852	Prkacb/Camk2d/Mapk3/Mapk14/Prkcb/Prkaca	6
mmu05214	mmu05214	Glioma	479	21/1978	0.399981	0.755613	0.677852	Camk2d/Ddb2/Mapk3/Cdk4/Prkcb/Cdk6	6
mmu00230	mmu00230	Purine metabolism	479	69/1978	0.402175	0.755613	0.677852	Rrm2/Adssl1/Pold1/Prps1/Dguok/Ak2/Impdh2/Adss/Gmpr2/Ampd2/Hprt/Adsl/Xdh/Nt5c2/Prune1/Paics/Nt5e/Nt5c3	18
mmu01524	mmu01524	Platinum drug resistance	479	29/1978	0.403948	0.755613	0.677852	Casp3/Gsto1/Msh2/Mapk3/Birc5/Casp8/Bcl2/Top2a	8
mmu04910	mmu04910	Insulin signaling pathway	479	49/1978	0.405071	0.755613	0.677852	Prkacb/Pck2/Pygb/Ptpn1/Lipe/Mapk3/Prkar1a/Trip10/Gsk3b/Fasn/Acaca/Gys1/Prkaca	13
mmu00232	mmu00232	Caffeine metabolism	479	1978-02-01	0.425777	0.76013	0.681903	Xdh	1
mmu00290	mmu00290	Valine, leucine and isoleucine biosynthesis	479	1978-02-01	0.425777	0.76013	0.681903	Bcat2	1
mmu00400	mmu00400	Phenylalanine, tyrosine and tryptophan biosynthesis	479	1978-02-01	0.425777	0.76013	0.681903	Got1	1
mmu00532	mmu00532	Glycosaminoglycan biosynthesis - chondroitin sulfate / dermatan sulfate	479	1978-02-01	0.425777	0.76013	0.681903	Chst12	1
mmu00750	mmu00750	Vitamin B6 metabolism	479	1978-02-01	0.425777	0.76013	0.681903	Psat1	1
mmu03450	mmu03450	Non-homologous end-joining	479	1978-02-01	0.425777	0.76013	0.681903	Mre11a	1
mmu04977	mmu04977	Vitamin digestion and absorption	479	1978-02-01	0.425777	0.76013	0.681903	Apob	1
mmu05164	mmu05164	Influenza A	479	54/1978	0.435663	0.767593	0.688598	Casp1/Mavs/Mapk3/Eif2s1/Nfkb1/Mapk14/Kpna2/Gsk3b/Nfkbia/Prkcb/Dnajc3/Fdps/Pycard/Irf3	14
mmu04922	mmu04922	Glucagon signaling pathway	479	34/1978	0.443969	0.767593	0.688598	Prkacb/Camk2d/Pck2/Pygb/Ppp3cb/Cpt1a/Acaca/Gys1/Prkaca	9
mmu04310	mmu04310	Wnt signaling pathway	479	30/1978	0.445644	0.767593	0.688598	Prkacb/Camk2d/Ppp3cb/Tbl1xr1/Gsk3b/Prkcb/Cul1/Prkaca	8
mmu00340	mmu00340	Histidine metabolism	479	1978-06-01	0.447504	0.767593	0.688598	Aldh2/Cndp2	2
mmu02010	mmu02010	ABC transporters	479	1978-06-01	0.447504	0.767593	0.688598	Tap1/Tap2	2
mmu00670	mmu00670	One carbon pool by folate	479	1978-10-01	0.450897	0.767593	0.688598	Tyms/Mthfd2/Shmt1	3
mmu05340	mmu05340	Primary immunodeficiency	479	1978-10-01	0.450897	0.767593	0.688598	Tap1/Tap2/Ikbkg	3
mmu00510	mmu00510	N-Glycan biosynthesis	479	14/1978	0.45106	0.767593	0.688598	Mgat1/Rpn2/Dpm1/Alg5	4
mmu05205	mmu05205	Proteoglycans in cancer	479	59/1978	0.463957	0.784951	0.70417	Ptpn6/Stat3/Prkacb/Casp3/Arhgef1/Pdcd4/Camk2d/Iqgap1/Mapk3/Tgfb1/Mapk14/Hcls1/Ezr/Prkcb/Prkaca	15
mmu05162	mmu05162	Measles	479	51/1978	0.469434	0.789626	0.708364	Stat3/Traf6/Mavs/Il2ra/Dok1/Eif2s1/Nfkb1/Gsk3b/Nfkbia/Cdk4/Cdk2/Cdk6/Irf3	13
mmu04152	mmu04152	AMPK signaling pathway	479	39/1978	0.479037	0.79657	0.714593	Pck2/Ccna2/Lipe/Ppp2r2a/Cpt1a/Ppp2r1b/Fasn/Acaca/Ppp2r2d/Gys1	10
mmu04611	mmu04611	Platelet activation	479	39/1978	0.479037	0.79657	0.714593	Prkacb/Arhgef1/Snap23/Tln1/Vasp/Mapk3/Mapk14/Myl12b/Lcp2/Prkaca	10
mmu04010	mmu04010	MAPK signaling pathway	479	64/1978	0.490216	0.810528	0.727115	Stmn1/Prkacb/Traf6/Casp3/Ppm1b/Ppp3cb/Mapk3/Tgfb1/Nfkb1/Mapk14/Map4k1/Ptpn7/Arrb2/Prkcb/Ikbkg/Prkaca	16
mmu04720	mmu04720	Long-term potentiation	479	23/1978	0.49674	0.816674	0.732629	Prkacb/Camk2d/Ppp3cb/Mapk3/Prkcb/Prkaca	6
mmu04550	mmu04550	Signaling pathways regulating pluripotency of stem cells	479	19/1978	0.502937	0.822218	0.737602	Stat3/Mapk3/Mapk14/Gsk3b/Rif1	5
mmu04350	mmu04350	TGF-beta signaling pathway	479	15/1978	0.510564	0.824908	0.740015	Mapk3/Tgfb1/Ppp2r1b/Cul1	4
mmu04923	mmu04923	Regulation of lipolysis in adipocytes	479	1978-11-01	0.520622	0.824908	0.740015	Prkacb/Lipe/Prkaca	3
mmu05020	mmu05020	Prion diseases	479	1978-11-01	0.520622	0.824908	0.740015	Prkacb/Mapk3/Prkaca	3
mmu04670	mmu04670	Leukocyte transendothelial migration	479	36/1978	0.5209	0.824908	0.740015	Thy1/Myl9/Vasp/Mapk14/Myl12b/Ezr/Prkcb/Pecam1/Rassf5	9
mmu05203	mmu05203	Viral carcinogenesis	479	90/1978	0.521702	0.824908	0.740015	Stat3/Prkacb/Casp3/Scin/Ccna2/Ddb1/Mapk3/Casp8/H2-K1/Nfkb1/Ywhae/Ywhaz/Ywhah/Snd1/Nfkbia/Cdk1/Cdk4/Cdk2/Cdk6/Ikbkg/Prkaca/Irf3	22
mmu04120	mmu04120	Ubiquitin mediated proteolysis	479	57/1978	0.527705	0.824908	0.740015	Traf6/Fbxo2/Ddb2/Trip12/Ddb1/Sae1/Ube2c/Ube2a/Cul4b/Cdc27/Cul4a/Anapc5/Cul1/Stub1	14
mmu04072	mmu04072	Phospholipase D signaling pathway	479	28/1978	0.534561	0.824908	0.740015	Cyth1/Dgka/Mapk3/Dgkz/Agpat5/Cyth4/Dnm2	7
mmu00590	mmu00590	Arachidonic acid metabolism	479	1978-07-01	0.53562	0.824908	0.740015	Lta4h/Ptges2	2
mmu05217	mmu05217	Basal cell carcinoma	479	1978-07-01	0.53562	0.824908	0.740015	Ddb2/Gsk3b	2
mmu05219	mmu05219	Bladder cancer	479	1978-07-01	0.53562	0.824908	0.740015	Mapk3/Cdk4	2
mmu00020	mmu00020	Citrate cycle (TCA cycle)	479	24/1978	0.543156	0.824908	0.740015	Pck2/Aco2/Cs/Mdh2/Sdha/Fh1	6
mmu04024	mmu04024	cAMP signaling pathway	479	41/1978	0.550689	0.824908	0.740015	Prkacb/Camk2d/Myl9/Atp1b1/Lipe/Mapk3/Nfkb1/Nfkbia/Atp2a2/Prkaca	10
mmu04659	mmu04659	Th17 cell differentiation	479	41/1978	0.550689	0.824908	0.740015	Stat3/Foxp3/Il2ra/Ppp3cb/Mapk3/Tgfb1/Nfkb1/Mapk14/Nfkbia/Ikbkg	10
mmu04068	mmu04068	FoxO signaling pathway	479	37/1978	0.55806	0.824908	0.740015	Ccnb1/Stat3/Plk1/Pck2/Mapk3/Tgfb1/Mapk14/Cdk2/Atg12	9
mmu04217	mmu04217	Necroptosis	479	54/1978	0.563483	0.824908	0.740015	Capn2/Glud1/Casp1/Stat3/Camk2d/Pygb/Vdac2/Casp8/Slc25a5/Sqstm1/Sharpin/Bcl2/Pycard	13
mmu00360	mmu00360	Phenylalanine metabolism	479	1978-03-01	0.564974	0.824908	0.740015	Got1	1
mmu00770	mmu00770	Pantothenate and CoA biosynthesis	479	1978-03-01	0.564974	0.824908	0.740015	Bcat2	1
mmu04658	mmu04658	Th1 and Th2 cell differentiation	479	33/1978	0.566433	0.824908	0.740015	Il2ra/Ppp3cb/Mapk3/Nfkb1/Mapk14/Runx3/Nfkbia/Ikbkg	8
mmu04921	mmu04921	Oxytocin signaling pathway	479	33/1978	0.566433	0.824908	0.740015	Prkacb/Camk2d/Myl9/Ppp3cb/Myl6/Mapk3/Prkcb/Prkaca	8
mmu05220	mmu05220	Chronic myeloid leukemia	479	33/1978	0.566433	0.824908	0.740015	Ddb2/Mapk3/Tgfb1/Nfkb1/Nfkbia/Cdk4/Cdk6/Ikbkg	8
mmu04972	mmu04972	Pancreatic secretion	479	16/1978	0.566947	0.824908	0.740015	Car2/Atp1b1/Prkcb/Atp2a2	4
mmu05218	mmu05218	Melanoma	479	16/1978	0.566947	0.824908	0.740015	Ddb2/Mapk3/Cdk4/Cdk6	4
mmu00240	mmu00240	Pyrimidine metabolism	479	46/1978	0.577156	0.831447	0.745881	Cad/Tk1/Tyms/Rrm2/Pold1/Dtymk/Dhodh/Upp1/Nt5c2/Nt5e/Nt5c3	11
mmu04140	mmu04140	Autophagy - animal	479	46/1978	0.577156	0.831447	0.745881	Prkacb/Traf6/Mapk3/Eif2s1/Atg5/Sh3glb1/Bcl2/Ctsd/Vmp1/Atg12/Prkaca	11
mmu04924	mmu04924	Renin secretion	479	1978-12-01	0.58522	0.834799	0.748888	Prkacb/Ppp3cb/Prkaca	3
mmu05416	mmu05416	Viral myocarditis	479	1978-12-01	0.58522	0.834799	0.748888	Casp3/Casp8/H2-K1	3
mmu04722	mmu04722	Neurotrophin signaling pathway	479	38/1978	0.593991	0.841135	0.754572	Traf6/Camk2d/Mapk3/Nfkb1/Mapk14/Ywhae/Gsk3b/Nfkbia/Bcl2	9
mmu00480	mmu00480	Glutathione metabolism	479	21/1978	0.601623	0.841135	0.754572	Rrm2/Sms/Sms-ps/Gsto1/Gss	5
mmu00640	mmu00640	Propanoate metabolism	479	21/1978	0.601623	0.841135	0.754572	Acat2/Echs1/Acaca/Hibch/Pccb	5
mmu04520	mmu04520	Adherens junction	479	21/1978	0.601623	0.841135	0.754572	Ptpn6/Iqgap1/Ptpn1/Mapk3/Acp1	5
mmu04650	mmu04650	Natural killer cell mediated cytotoxicity	479	34/1978	0.604114	0.841135	0.754572	Gzmb/Ptpn6/Casp3/Ppp3cb/Mapk3/H2-K1/Prkcb/Lcp2	8
mmu03410	mmu03410	Base excision repair	479	1978-08-01	0.613543	0.842174	0.755504	Pold1/Pcna	2
mmu04974	mmu04974	Protein digestion and absorption	479	1978-08-01	0.613543	0.842174	0.755504	Slc3a2/Atp1b1	2
mmu04978	mmu04978	Mineral absorption	479	1978-08-01	0.613543	0.842174	0.755504	Hmox2/Atp1b1	2
mmu04066	mmu04066	HIF-1 signaling pathway	479	43/1978	0.618268	0.844676	0.757749	Eno3/Stat3/Camk2d/Mapk3/Eno1/Eno1b/Nfkb1/Bcl2/Prkcb/Pdk1	10
mmu04666	mmu04666	Fc gamma R-mediated phagocytosis	479	39/1978	0.628477	0.849874	0.762412	Bin1/Scin/Vasp/Mapk3/Arpc5/Inpp5d/Prkcb/Dnm2/Arpc1a	9
mmu01522	mmu01522	Endocrine resistance	479	26/1978	0.62969	0.849874	0.762412	Prkacb/Mapk3/Mapk14/Bcl2/Cdk4/Prkaca	6
mmu04510	mmu04510	Focal adhesion	479	52/1978	0.630834	0.849874	0.762412	Capn2/Itgb7/Itga6/Myl9/Tln1/Vasp/Mapk3/Myl12b/Gsk3b/Bcl2/Prkcb/Parvg	12
mmu04668	mmu04668	TNF signaling pathway	479	35/1978	0.640068	0.85834	0.770007	Casp3/Mapk3/Casp8/Nfkb1/Mapk14/Il18r1/Nfkbia/Ikbkg	8
mmu04130	mmu04130	SNARE interactions in vesicular transport	479	13/1978	0.643968	0.859134	0.770719	Sec22b/Snap23/Gosr2	3
mmu04917	mmu04917	Prolactin signaling pathway	479	22/1978	0.646565	0.859134	0.770719	Stat3/Mapk3/Nfkb1/Mapk14/Gsk3b	5
mmu00740	mmu00740	Riboflavin metabolism	479	1978-04-01	0.670481	0.882851	0.791995	Acp1	1
mmu05143	mmu05143	African trypanosomiasis	479	1978-04-01	0.670481	0.882851	0.791995	Prkcb	1
mmu04071	mmu04071	Sphingolipid signaling pathway	479	45/1978	0.680331	0.888704	0.797246	Degs1/Mapk3/Ppp2r2a/Nfkb1/Mapk14/Ppp2r1b/Bcl2/Ctsd/Prkcb/Ppp2r2d	10
mmu00860	mmu00860	Porphyrin and chlorophyll metabolism	479	1978-09-01	0.681034	0.888704	0.797246	Hmox2/Alad	2
mmu03030	mmu03030	DNA replication	479	23/1978	0.688183	0.890811	0.799136	Pold1/Ssbp1/Rfc2/Rpa1/Pcna	5
mmu04919	mmu04919	Thyroid hormone signaling pathway	479	32/1978	0.688771	0.890811	0.799136	Prkacb/Atp1b1/Mapk3/Gsk3b/Prkcb/Atp2a2/Prkaca	7
mmu04660	mmu04660	T cell receptor signaling pathway	479	50/1978	0.697476	0.898077	0.805654	Grap2/Ptpn6/Ppp3cb/Mapk3/Nfkb1/Mapk14/Gsk3b/Nfkbia/Cdk4/Lcp2/Ikbkg	11
mmu05226	mmu05226	Gastric cancer	479	28/1978	0.705892	0.90491	0.811784	Ddb2/Mapk3/Tgfb1/Gsk3b/Bcl2/Cdk2	6
mmu04142	mmu04142	Lysosome	479	55/1978	0.713106	0.910148	0.816483	Npc1/Glb1/Aga/Cltc/Hexa/Ctsw/Gga1/Ctsd/Ap1g1/Igf2r/Gm2a/Naga	12
mmu01521	mmu01521	EGFR tyrosine kinase inhibitor resistance	479	24/1978	0.726348	0.923001	0.828013	Stat3/Mapk3/Gsk3b/Bcl2/Prkcb	5
mmu00450	mmu00450	Selenocompound metabolism	479	1978-10-01	0.738569	0.930405	0.834655	Mars/Cth	2
mmu04136	mmu04136	Autophagy - other	479	1978-10-01	0.738569	0.930405	0.834655	Atg5/Atg12	2
mmu04730	mmu04730	Long-term depression	479	15/1978	0.743083	0.932057	0.836137	Mapk3/Ppp2r1b/Prkcb	3
mmu00514	mmu00514	Other types of O-glycan biosynthesis	479	1978-05-01	0.750441	0.934576	0.838397	Ogt	1
mmu04514	mmu04514	Cell adhesion molecules (CAMs)	479	20/1978	0.751515	0.934576	0.838397	Itgb7/Itga6/H2-K1/Pecam1	4
mmu04137	mmu04137	Mitophagy - animal	479	25/1978	0.761036	0.942389	0.845406	Atg5/Sqstm1/Rhot1/Rhot2/Tax1bp1	5
mmu04360	mmu04360	Axon guidance	479	30/1978	0.770724	0.950342	0.852541	Camk2d/Ppp3cb/Mapk3/Gsk3b/Dpysl2/Pdk1	6
mmu04370	mmu04370	VEGF signaling pathway	479	21/1978	0.786784	0.957421	0.858891	Ppp3cb/Mapk3/Mapk14/Prkcb	4
mmu04640	mmu04640	Hematopoietic cell lineage	479	1978-11-01	0.787001	0.957421	0.858891	Itga6/Il2ra	2
mmu04973	mmu04973	Carbohydrate digestion and absorption	479	1978-11-01	0.787001	0.957421	0.858891	Atp1b1/Prkcb	2
mmu04146	mmu04146	Peroxisome	479	31/1978	0.798873	0.957421	0.858891	Ech1/Acsl5/Scp2/Xdh/Pmvk/Crot	6
mmu04014	mmu04014	Ras signaling pathway	479	50/1978	0.806605	0.957421	0.858891	Prkacb/Rab5c/Gng2/Mapk3/Nfkb1/Gnb2/Prkcb/Ikbkg/Prkaca/Rassf5	10
mmu00053	mmu00053	Ascorbate and aldarate metabolism	479	1978-06-01	0.811028	0.957421	0.858891	Aldh2	1
mmu00790	mmu00790	Folate biosynthesis	479	1978-06-01	0.811028	0.957421	0.858891	Gphn	1
mmu00982	mmu00982	Drug metabolism - cytochrome P450	479	1978-06-01	0.811028	0.957421	0.858891	Gsto1	1
mmu04022	mmu04022	cGMP-PKG signaling pathway	479	41/1978	0.812904	0.957421	0.858891	Myl9/Atp1b1/Ppp3cb/Vasp/Vdac2/Mapk3/Slc25a5/Atp2a2	8
mmu04211	mmu04211	Longevity regulating pathway	479	22/1978	0.817944	0.957421	0.858891	Prkacb/Atg5/Nfkb1/Prkaca	4
mmu05221	mmu05221	Acute myeloid leukemia	479	22/1978	0.817944	0.957421	0.858891	Stat3/Mapk3/Nfkb1/Ikbkg	4
mmu03018	mmu03018	RNA degradation	479	46/1978	0.819902	0.957421	0.858891	Eno3/Hspa9/Eno1/Eno1b/Ddx6/Hspd1/Cnot9/C1d/Edc3	9
mmu05224	mmu05224	Breast cancer	479	27/1978	0.820293	0.957421	0.858891	Ddb2/Mapk3/Gsk3b/Cdk4/Cdk6	5
mmu04064	mmu04064	NF-kappa B signaling pathway	479	32/1978	0.824281	0.957421	0.858891	Traf6/Nfkb1/Nfkbia/Bcl2/Prkcb/Ikbkg	6
mmu05216	mmu05216	Thyroid cancer	479	1978-12-01	0.827357	0.957421	0.858891	Ddb2/Mapk3	2
mmu00010	mmu00010	Glycolysis / Gluconeogenesis	479	37/1978	0.829107	0.957421	0.858891	Eno3/Aldh2/Pck2/Akr1a1/Gpi1/Eno1/Eno1b	7
mmu00920	mmu00920	Sulfur metabolism	479	1978-07-01	0.856929	0.985638	0.884204	Suox	1
mmu04664	mmu04664	Fc epsilon RI signaling pathway	479	24/1978	0.869044	0.990398	0.888475	Mapk3/Inpp5d/Mapk14/Lcp2	4
mmu05231	mmu05231	Choline metabolism in cancer	479	24/1978	0.869044	0.990398	0.888475	Dgka/Mapk3/Dgkz/Prkcb	4
mmu04213	mmu04213	Longevity regulating pathway - multiple species	479	19/1978	0.87483	0.990398	0.888475	Prkacb/Atg5/Prkaca	3
mmu05213	mmu05213	Endometrial cancer	479	19/1978	0.87483	0.990398	0.888475	Ddb2/Mapk3/Gsk3b	3
mmu00052	mmu00052	Galactose metabolism	479	14/1978	0.888054	0.990398	0.888475	Glb1/Ugp2	2
mmu00600	mmu00600	Sphingolipid metabolism	479	14/1978	0.888054	0.990398	0.888475	Degs1/Glb1	2
mmu04915	mmu04915	Estrogen signaling pathway	479	25/1978	0.889617	0.990398	0.888475	Prkacb/Mapk3/Hsp90b1/Prkaca	4
mmu00565	mmu00565	Ether lipid metabolism	479	1978-08-01	0.891699	0.990398	0.888475	Pafah1b3	1
mmu04330	mmu04330	Notch signaling pathway	479	1978-08-01	0.891699	0.990398	0.888475	Dtx3l	1
mmu05225	mmu05225	Hepatocellular carcinoma	479	46/1978	0.90144	0.99741	0.894765	Ddb2/Gsto1/Mapk3/Tgfb1/Gsk3b/Cdk4/Prkcb/Cdk6	8
mmu04630	mmu04630	Jak-STAT signaling pathway	479	26/1978	0.90731	1	0.897088	Ptpn6/Stat3/Il2ra/Bcl2	4
mmu04371	mmu04371	Apelin signaling pathway	479	37/1978	0.915348	1	0.897088	Prkacb/Lipe/Gng2/Mapk3/Gnb2/Prkaca	6
mmu04710	mmu04710	Circadian rhythm	479	1978-09-01	0.918032	1	0.897088	Cul1	1
mmu05010	mmu05010	Alzheimer's disease	479	96/1978	0.923032	1	0.897088	Capn2/Casp3/Rtn3/Ppp3cb/Atp5b/Mapk3/Adam10/Casp8/Sdha/Atp5h/Gsk3b/Ndufb11/ATP6/Atp5e/Atp5f1/Atp2a2/Atp5a1/Rtn4	18
mmu04721	mmu04721	Synaptic vesicle cycle	479	22/1978	0.9302	1	0.897088	Cltc/Ap2b1/Dnm2	3
mmu04012	mmu04012	ErbB signaling pathway	479	28/1978	0.935323	1	0.897088	Camk2d/Mapk3/Gsk3b/Prkcb	4
mmu04150	mmu04150	mTOR signaling pathway	479	44/1978	0.936299	1	0.897088	Slc3a2/Slc7a5/Mapk3/Gsk3b/Prkcb/Seh1l/Clip1	7
mmu00980	mmu00980	Metabolism of xenobiotics by cytochrome P450	479	1978-11-01	0.95307	1	0.897088	Gsto1	1
mmu04930	mmu04930	Type II diabetes mellitus	479	1978-11-01	0.95307	1	0.897088	Mapk3	1
mmu03060	mmu03060	Protein export	479	18/1978	0.954794	1	0.897088	Srp54a/Srp54b	2
mmu05204	mmu05204	Chemical carcinogenesis	479	1978-12-01	0.964498	1	0.897088	Gsto1	1
mmu05211	mmu05211	Renal cell carcinoma	479	26/1978	0.969369	1	0.897088	Mapk3/Tgfb1/Fh1	3
mmu04966	mmu04966	Collecting duct acid secretion	479	13/1978	0.973148	1	0.897088	Car2	1
mmu04260	mmu04260	Cardiac muscle contraction	479	27/1978	0.975235	1	0.897088	Atp1b1/Tpm4/Atp2a2	3
mmu05230	mmu05230	Central carbon metabolism in cancer	479	27/1978	0.975235	1	0.897088	Slc7a5/Mapk3/Pdk1	3
mmu05202	mmu05202	Transcriptional misregulation in cancer	479	39/1978	0.976006	1	0.897088	Gzmb/Itgb7/Ddb2/Nfkb1/Aspscr1	5
mmu05012	mmu05012	Parkinson's disease	479	92/1978	0.977563	1	0.897088	Prkacb/Casp3/Atp5b/Vdac2/Htra2/ND2/Slc25a5/Sdha/Atp5h/Ndufb11/ATP6/Atp5e/Atp5f1/Prkaca/Atp5a1	15
mmu04723	mmu04723	Retrograde endocannabinoid signaling	479	62/1978	0.980018	1	0.897088	Prkacb/Gng2/Mapk3/ND2/Mapk14/Gnb2/Ndufb11/Prkcb/Prkaca	9
mmu03013	mmu03013	RNA transport	479	94/1978	0.98278	1	0.897088	Eif3j1/Eif2s1/Cyfip1/Paip1/Eif3i/Eif4a2/Aaas/Nup160/Eef1a1/Seh1l/Nup85/Eif2s3y/Eif3d/Gemin5/Thoc1	15
mmu05016	mmu05016	Huntington's disease	479	109/1978	0.991089	1	0.897088	Casp3/Atp5b/Vdac2/Cltc/Dctn2/Casp8/Slc25a5/Sdha/Ap2b1/Atp5h/Dctn1/Ndufb11/ATP6/Atp5e/Atp5f1/Atp5a1/Dctn4	17
mmu00051	mmu00051	Fructose and mannose metabolism	479	17/1978	0.991226	1	0.897088	Mpi	1
mmu05323	mmu05323	Rheumatoid arthritis	479	20/1978	0.996215	1	0.897088	Tgfb1	1
mmu00190	mmu00190	Oxidative phosphorylation	479	92/1978	0.997825	1	0.897088	Atp5b/Ppa1/ND2/Cox17/Sdha/Atp5h/Ndufb11/ATP6/Atp5j2/Atp5e/Atp5f1/Atp5a1	12
mmu04932	mmu04932	Non-alcoholic fatty liver disease (NAFLD)	479	80/1978	0.99972	1	0.897088	Casp3/Eif2s1/Casp8/Tgfb1/Nfkb1/Sdha/Gsk3b/Ndufb11	8
mmu03015	mmu03015	mRNA surveillance pathway	479	47/1978	0.999755	1	0.897088	Ppp2r2a/Ppp2r1b/Ppp2r2d	3
mmu05034	mmu05034	Alcoholism	479	55/1978	0.99979	1	0.897088	Gng2/Mapk3/Gnb2/Prkaca	4
mmu03010	mmu03010	Ribosome	479	102/1978	1	1	0.897088	Rpl39/Mrps5	2
mmu03040	mmu03040	Spliceosome	479	100/1978	1	1	0.897088	Thoc1	1

## Sheet: Fig3c_TFs
Protein ID	Symbol	Entrez Gene Name	Log FC	Location	Type(s)
Q60611	SATB1	SATB homeobox 1	6.015	Nucleus	transcription regulator
P09450	JUNB	JunB proto-oncogene, AP-1 transcription factor subunit	5.928	Nucleus	transcription regulator
P97303	BACH2	BTB domain and CNC homolog 2	5.562	Nucleus	transcription regulator
Q00417	Tcf7	transcription factor 7, T cell specific	5.216	Nucleus	transcription regulator
Q9JJZ6	KLF13	Kruppel like factor 13	4.704	Nucleus	transcription regulator
P48377	RFX1	regulatory factor X1	4.364	Nucleus	transcription regulator
Q8R3B7	BRD8	bromodomain containing 8	3.611	Nucleus	transcription regulator
P97765	WBP2	WW domain binding protein 2	3.492	Cytoplasm	transcription regulator
Q8K1A6	CC2D1A	coiled-coil and C2 domain containing 1A	3.343	Cytoplasm	transcription regulator
O08789	MNT	MAX network transcriptional repressor	3.14	Nucleus	transcription regulator
P18608	HMGN1	high mobility group nucleosome binding domain 1	3.059	Nucleus	transcription regulator
P97360	ETV6	ETS variant 6	3.043	Nucleus	transcription regulator
Q03347	RUNX1	runt related transcription factor 1	2.992	Nucleus	transcription regulator
P56959	Fus	fused in sarcoma	2.945	Nucleus	transcription regulator
P25976	UBTF	upstream binding transcription factor, RNA polymerase I	2.917	Nucleus	transcription regulator
P27661	H2AFX	H2A histone family member X	2.891	Nucleus	transcription regulator
Q61458	CCNH	cyclin H	2.866	Nucleus	transcription regulator
Q9Z0H7	BCL10	B-cell CLL/lymphoma 10	2.778	Cytoplasm	transcription regulator
Q9Z248	AEBP2	AE binding protein 2	2.582	Nucleus	transcription regulator
Q9JKX4	AATF	apoptosis antagonizing transcription factor	2.429	Nucleus	transcription regulator
Q8VDM1	ZGPAT	zinc finger CCCH-type and G-patch domain containing	2.4	Nucleus	transcription regulator
Q9QWV9	CCNT1	cyclin T1	2.304	Nucleus	transcription regulator
Q61466	SMARCD1	SWI/SNF related, matrix associated, actin dependent regulator of chromatin, subfamily d, member 1	2.154	Nucleus	transcription regulator
Q9R0A0	PEX14	peroxisomal biogenesis factor 14	1.856	Cytoplasm	transcription regulator
Q8CB77	ELOA	elongin A	1.742	Nucleus	transcription regulator
Q91YK2	RRP1B	ribosomal RNA processing 1B	1.648	Nucleus	transcription regulator
Q61127	NAB2	NGFI-A binding protein 2	1.457	Nucleus	transcription regulator
Q9Z2D6	MECP2	methyl-CpG binding protein 2	1.334	Nucleus	transcription regulator
Q64287	IRF4	interferon regulatory factor 4	1.274	Nucleus	transcription regulator
Q60953	PML	promyelocytic leukemia	1.106	Nucleus	transcription regulator
Q9ESZ8	GTF2I	general transcription factor IIi	1.016	Nucleus	transcription regulator
Q9R1E0	FOXO1	forkhead box O1	1.014	Nucleus	transcription regulator
P0C7N9	PSMG4	proteasome assembly chaperone 4	1.007	Other	transcription regulator
P63139	NFYB	nuclear transcription factor Y subunit beta	0.956	Nucleus	transcription regulator
Q8VH51	RBM39	RNA binding motif protein 39	0.935	Nucleus	transcription regulator
Q9CWW7	CXXC1	CXXC finger protein 1	0.874	Nucleus	transcription regulator
Q80YV3	TRRAP	transformation/transcription domain associated protein	0.862	Nucleus	transcription regulator
O08900	IKZF3	IKAROS family zinc finger 3	0.812	Nucleus	transcription regulator
Q8R409	HEXIM1	hexamethylene bisacetamide inducible 1	0.785	Nucleus	transcription regulator
Q9D4J7	PHF6	PHD finger protein 6	0.771	Nucleus	transcription regulator
Q7TNV0	DEK	DEK proto-oncogene	0.77	Nucleus	transcription regulator
P11031	SUB1	SUB1 homolog, transcriptional regulator	0.748	Nucleus	transcription regulator
Q9Z0H3	SMARCB1	SWI/SNF related, matrix associated, actin dependent regulator of chromatin, subfamily b, member 1	0.726	Nucleus	transcription regulator
Q9CZY3	UBE2V1	ubiquitin conjugating enzyme E2 V1	0.717	Nucleus	transcription regulator
Q00422	GABPA	GA binding protein transcription factor alpha subunit	0.713	Nucleus	transcription regulator
O54941	SMARCE1	SWI/SNF related, matrix associated, actin dependent regulator of chromatin, subfamily e, member 1	0.704	Nucleus	transcription regulator
Q8VDQ8	SIRT2	sirtuin 2	0.698	Nucleus	transcription regulator
Q8BI72	CDKN2AIP	CDKN2A interacting protein	0.69	Nucleus	transcription regulator
Q9D0D5	GTF2E1	general transcription factor IIE subunit 1	0.689	Nucleus	transcription regulator
Q91VJ5	PQBP1	polyglutamine binding protein 1	0.68	Nucleus	transcription regulator
Q61191	HCFC1	host cell factor C1	0.675	Nucleus	transcription regulator
Q99JF8	PSIP1	PC4 and SFRS1 interacting protein 1	0.666	Nucleus	transcription regulator
Q6PDG5	SMARCC2	SWI/SNF related, matrix associated, actin dependent regulator of chromatin subfamily c member 2	0.653	Nucleus	transcription regulator
Q00899	YY1	YY1 transcription factor	0.647	Nucleus	transcription regulator
Q9JMD0	ZNF207	zinc finger protein 207	0.626	Nucleus	transcription regulator
Q569Z6	THRAP3	thyroid hormone receptor associated protein 3	0.599	Nucleus	transcription regulator
A2BH40	ARID1A	AT-rich interaction domain 1A	0.597	Nucleus	transcription regulator
Q62093	SRSF2	serine and arginine rich splicing factor 2	0.565	Nucleus	transcription regulator
Q99PM3	GTF2A1	general transcription factor IIA subunit 1	0.564	Cytoplasm	transcription regulator
P52633	STAT6	signal transducer and activator of transcription 6	0.563	Nucleus	transcription regulator
Q9D1J3	SARNP	SAP domain containing ribonucleoprotein	0.538	Nucleus	transcription regulator
Q9R190	MTA2	metastasis associated 1 family member 2	0.526	Nucleus	transcription regulator
Q920B9	SUPT16H	SPT16 homolog, facilitates chromatin remodeling subunit	0.526	Nucleus	transcription regulator
P14148	RPL7	ribosomal protein L7	0.514	Nucleus	transcription regulator
Q91WJ8	FUBP1	far upstream element binding protein 1	0.508	Nucleus	transcription regulator
Q9JMG1	EDF1	endothelial differentiation related factor 1	0.499	Nucleus	transcription regulator
Q6PGH1	Bud31	BUD31 homolog	0.493	Nucleus	transcription regulator
Q9D6N5	DRAP1	DR1 associated protein 1	0.486	Nucleus	transcription regulator
P60122	RUVBL1	RuvB like AAA ATPase 1	0.484	Nucleus	transcription regulator
Q64012	RALY	RALY heterogeneous nuclear ribonucleoprotein	0.478	Nucleus	transcription regulator
Q9WTM5	RUVBL2	RuvB like AAA ATPase 2	0.469	Nucleus	transcription regulator
Q60668	HNRNPD	heterogeneous nuclear ribonucleoprotein D	0.468	Nucleus	transcription regulator
Q03267	IKZF1	IKAROS family zinc finger 1	0.46	Nucleus	transcription regulator
Q9WVG6	CARM1	coactivator associated arginine methyltransferase 1	0.443	Nucleus	transcription regulator
Q8C2Q3	RBM14	RNA binding motif protein 14	0.427	Nucleus	transcription regulator
Q99PP7	TRIM33	tripartite motif containing 33	0.419	Nucleus	transcription regulator
Q8CH18	CCAR1	cell division cycle and apoptosis regulator 1	0.417	Nucleus	transcription regulator
Q9CXY6	ILF2	interleukin enhancer binding factor 2	0.394	Nucleus	transcription regulator
Q9QYJ3	DNAJB1	DnaJ heat shock protein family (Hsp40) member B1	0.389	Nucleus	transcription regulator
Q3TKT4	SMARCA4	SWI/SNF related, matrix associated, actin dependent regulator of chromatin, subfamily a, member 4	0.386	Nucleus	transcription regulator
O09106	HDAC1	histone deacetylase 1	0.364	Nucleus	transcription regulator
Q8CHY6	GATAD2A	GATA zinc finger domain containing 2A	0.359	Nucleus	transcription regulator
Q91ZW3	SMARCA5	SWI/SNF related, matrix associated, actin dependent regulator of chromatin, subfamily a, member 5	0.34	Nucleus	transcription regulator
P63158	Gm21596/Hmgb1	high mobility group box 1	0.324	Nucleus	transcription regulator
P27870	VAV1	vav guanine nucleotide exchange factor 1	0.32	Nucleus	transcription regulator
Q08024	CBFB	core-binding factor beta subunit	0.299	Nucleus	transcription regulator
P10711	TCEA1	transcription elongation factor A1	0.27	Nucleus	transcription regulator
Q6A068	CDC5L	cell division cycle 5 like	0.268	Nucleus	transcription regulator
P62960	YBX1	Y-box binding protein 1	0.262	Nucleus	transcription regulator
Q8CGF7	TCERG1	transcription elongation regulator 1	0.261	Nucleus	transcription regulator
P61979	HNRNPK	heterogeneous nuclear ribonucleoprotein K	0.26	Nucleus	transcription regulator
Q62422	OSTF1	osteoclast stimulating factor 1	0.219	Nucleus	transcription regulator
Q7TMY8	HUWE1	HECT, UBA and WWE domain containing 1, E3 ubiquitin protein ligase	0.218	Nucleus	transcription regulator
P83870	PHF5A	PHD finger protein 5A	0.216	Nucleus	transcription regulator
O35129	PHB2	prohibitin 2	0.212	Cytoplasm	transcription regulator
Q9Z1X4	ILF3	interleukin enhancer binding factor 3	0.211	Nucleus	transcription regulator
Q7TPR4	ACTN1	actinin alpha 1	0.204	Cytoplasm	transcription regulator
Q7TPV4	MYBBP1A	MYB binding protein 1a	0.189	Nucleus	transcription regulator
Q60817	NACA	nascent polypeptide-associated complex alpha subunit	0.178	Cytoplasm	transcription regulator
Q9EPB4	PYCARD	PYD and CARD domain containing	-0.199	Cytoplasm	transcription regulator
P61202	Cops2	COP9 signalosome subunit 2	-0.211	Nucleus	transcription regulator
P25799	NFKB1	nuclear factor kappa B subunit 1	-0.227	Nucleus	transcription regulator
P53996	CNBP	CCHC-type zinc finger nucleic acid binding protein	-0.269	Nucleus	transcription regulator
Q99N69	LPXN	leupaxin	-0.293	Cytoplasm	transcription regulator
Q9Z2L7	CRLF3	cytokine receptor like factor 3	-0.296	Cytoplasm	transcription regulator
P68510	YWHAH	tyrosine 3-monooxygenase/tryptophan 5-monooxygenase activation protein eta	-0.336	Cytoplasm	transcription regulator
P42669	PURA	purine rich element binding protein A	-0.384	Nucleus	transcription regulator
P15307	REL	REL proto-oncogene, NF-kB subunit	-0.408	Nucleus	transcription regulator
Q60749	KHDRBS1	KH RNA binding domain containing, signal transduction associated 1	-0.41	Nucleus	transcription regulator
Q80WJ7	MTDH	metadherin	-0.444	Cytoplasm	transcription regulator
Q9CR00	PSMD9	proteasome 26S subunit, non-ATPase 9	-0.489	Cytoplasm	transcription regulator
Q8BHJ5	TBL1XR1	transducin beta like 1 X-linked receptor 1	-0.499	Nucleus	transcription regulator
Q8R3N6	THOC1	THO complex 1	-0.505	Nucleus	transcription regulator
P14211	CALR	calreticulin	-0.535	Cytoplasm	transcription regulator
Q60973	RBBP7	RB binding protein 7, chromatin remodeling factor	-0.569	Nucleus	transcription regulator
O35658	C1QBP	complement C1q binding protein	-0.572	Cytoplasm	transcription regulator
Q8BIH0	SAP130	Sin3A associated protein 130	-0.61	Nucleus	transcription regulator
Q8BWM0	PTGES2	prostaglandin E synthase 2	-0.626	Cytoplasm	transcription regulator
P70671	IRF3	interferon regulatory factor 3	-0.631	Nucleus	transcription regulator
Q9JKB3	YBX3	Y-box binding protein 3	-0.64	Nucleus	transcription regulator
E9Q1P8	IRF2BP2	interferon regulatory factor 2 binding protein 2	-0.676	Nucleus	transcription regulator
O35309	NMI	N-myc and STAT interactor	-0.798	Cytoplasm	transcription regulator
P35601	RFC1	replication factor C subunit 1	-0.81	Nucleus	transcription regulator
P42227	STAT3	signal transducer and activator of transcription 3	-0.824	Nucleus	transcription regulator
Q64337	SQSTM1	sequestosome 1	-0.883	Cytoplasm	transcription regulator
Q61164	CTCF	CCCTC-binding factor	-0.894	Nucleus	transcription regulator
Q8BFV2	PCID2	PCI domain containing 2	-0.91	Nucleus	transcription regulator
Q3UA06	TRIP13	thyroid hormone receptor interactor 13	-0.981	Cytoplasm	transcription regulator
P42128	FOXK1	forkhead box K1	-1.09	Nucleus	transcription regulator
O35473	C1D	C1D nuclear receptor corepressor	-1.234	Nucleus	transcription regulator
P42225	STAT1	signal transducer and activator of transcription 1	-1.473	Nucleus	transcription regulator
P58462	Foxp1	forkhead box P1	-1.656	Nucleus	transcription regulator
Q9D071	MMS19	MMS19 homolog, cytosolic iron-sulfur assembly component	-1.976	Nucleus	transcription regulator
O08792	EBF2	early B-cell factor 2	-2.005	Nucleus	transcription regulator
Q924H2	MED15	mediator complex subunit 15	-2.211	Nucleus	transcription regulator
Q3TNH5	FAM172A	family with sequence similarity 172 member A	-2.214	Cytoplasm	transcription regulator
Q9WVL2	STAT2	signal transducer and activator of transcription 2	-2.216	Nucleus	transcription regulator
Q91XV3	BASP1	brain abundant membrane attached signal protein 1	-2.522	Nucleus	transcription regulator
Q921G6	LRCH4	leucine rich repeats and calponin homology domain containing 4	-2.542	Cytoplasm	transcription regulator
O88291	ZNF326	zinc finger protein 326	-2.63	Nucleus	transcription regulator
Q9ERG2	STRN3	striatin 3	-2.887	Nucleus	transcription regulator
Q9CS74	ECD	ecdysoneless cell cycle regulator	-2.904	Nucleus	transcription regulator
Q02614	SAP30BP	SAP30 binding protein	-2.98	Nucleus	transcription regulator
P70403	Cux1	cut-like homeobox 1	-2.995	Nucleus	transcription regulator
Q99KN2	CIAO1	cytosolic iron-sulfur assembly component 1	-3.235	Nucleus	transcription regulator
Q64131	RUNX3	runt related transcription factor 3	-3.37	Nucleus	transcription regulator
P28574	MAX	MYC associated factor X	-3.478	Nucleus	transcription regulator
Q9Z1E3	NFKBIA	NFKB inhibitor alpha	-4.125	Cytoplasm	transcription regulator
Q9CYZ8	SSBP2	single stranded DNA binding protein 2	-4.349	Nucleus	transcription regulator
Q9CX60	LBH	limb bud and heart development	-4.66	Nucleus	transcription regulator
Q8C208	IKZF4	IKAROS family zinc finger 4	-6.027	Nucleus	transcription regulator
Q99JB6	FOXP3	forkhead box P3	-7.656	Nucleus	transcription regulator
P51450	RORC	RAR related orphan receptor C	4.62	Nucleus	ligand-dependent nuclear receptor
P30561	AHR	aryl hydrocarbon receptor	4.171	Nucleus	ligand-dependent nuclear receptor
P06537	NR3C1	nuclear receptor subfamily 3 group C member 1	-2.143	Nucleus	ligand-dependent nuclear receptor

## Sheet: S3abc.Fig
74 common elements in "Th17 up" and "iTreg up":		120 common elements in "Th17 down" and "iTreg down":		20 common elements in "Th17 up" and "iTreg down":		26 common elements in "Th17 down" and "iTreg up":		316 elements included exclusively in "Th17 up":		440 elements included exclusively in "Th17 down":		207 elements included exclusively in "iTreg up":		222 elements included exclusively in "iTreg down":
Cpd		Prdx3		Nat2		Oat		Rrp1b		Immt		Itgae		Bysl
Foxo1		Ncstn		Abhd17b		Psme2		Cdkn1b		Abhd11		Foxp3		Sars
Fam129b		Hist1h1c		Klf13		Lrch4		Igfbp4		Clpp		Cdc42se2		Ndufa10
Cnot2		Hat1		Coa6		Zdhhc20		Bles03		Exoc5		Pfn2		Khnyn
Ctsw		Gsn		Uap1		Ctss		Bach2		Fh		Tmed4		Gpi
Nmt2		Arl6ip5		Paip2		Rab21		Ctla2a		Ltn1		Kynu		Casp3
Gpr68		Ndufb7		Etv6		Eci1		Il17f		Mdh2		Prnp		Szrd1
Aldoc		Uck2		Tgm2		Racgap1		Kcmf1		Dnmt1		Cmtm7		Pgd
Utp23		Mtco2		Eif4ebp1		Spin1		Ubfd1		Aarsd1		Bap1		Npm1
Nmes1		H2-Ab1		Glrx		Itga6		Slc4a2		Dlst		Fsd1l		Polr2c
Ablim1		Hist1h1a		Glipr2		Stk39		Acpp		Mrpl39		Diaph2		Sacm1l
Dpy30		Ero1l		Sh2d1a		Fscn1		Elf1		Praf2		Upp1		Pdcl3
Vipas39		Znf281		Ppp1r2		Coro2a		Rorc		Stat1		Ythdf1		Slc2a1
Gatm		Ssrp1		Satb1		Adpgk		Skap2		Slc25a20		Rras		Slc25a12
Capg		P4hb		Emb		Reep5		Pde6d		Anxa7		Epn1		Zap70
Arhgap27		Hspe1		Npc2		Riok1		Fcho1		Dpp7		Pdcd1		Dnah3
Pold1		Slc25a13		Gpatch8		Gosr2		Synrg		Sfr1		Golm1		Aldh2
Cirbp		Timm9		Ewsr1		Myh11		Isg20l2		Atp5a1		Ccl1		Hist1h2bk
Mical1		Cox5b		Pkm		Ebf2		Tbcel		Tmem11		Rgs1		Got2
Nup188		Fam162a		Pstpip1		Dnajc10		Naa30		Rps6ka1		Kif1c		Sh3kbp1
Psd4		Mtnd4				Basp1		Pgm3		Vdac2		Phyhd1		Enoph1
Ndrg2		Lamp1				Eno3		Arrb1		Ptrh2		Pgm2l1		Gmfg
Epb41l2		Ndufb9				Dhodh		Dnajc17		Rer1		Runx3		Vdac1
Smap2		Bsg				Adssl1		Wbp2		Dnaja3		Ggps1		Ppif
Lgmn		Coa3				Ca2		Ggact		Gfm1		Tbc1d4		Stard3nl
Pdcd4		Ly6a				Ccr7		Stag1		Uqcrq		Gipc1		Ints9
Itgb7		Top2b						Babam1		Ndufs3		Art4		Carhsp1
Grap2		Tcra						Htra2		Hm13		Ikzf4		Prmt1
Gng2		Nucb1						Crtc3		Tbc1d13		Sirt7		Acly
Cstb		Baz1b						Acsl3		Tomm20		Znf326		Bop1
Arhgap25		Srgn						Clasp1		Chchd3		Nt5e		Ddx56
Pafah1b3		Lrmp						Pde5a		Fkbp2		Sdr39u1		Dnaja1
Plcg1		Uqcrc1						Comt		Hist1h3b		Atp1b1		Ndufa5
Acsf2		Ssr1						Gpatch11		Nnt		Myo1f		Mtatp8
Galm		Sfxn1						Aim2		Hist2h2ac;Hist2h2aa1		Idh1		Psip1
Uba1		Cbx1						Rbbp6		Tmx2		Cldnd1		Man2b1
Stard10		Prkcsh						Serpinb1a		Cnpy4		Lipe		Gls
Rftn1		Scamp3						Adarb1		Dnajc11		H3f3a		Asah1
Lxn		Ganab						Nfkbia		Pou2f1;Pou2f3;Pou2f2		Nucb2		Hist1h1d
Glod4		Ly9						Ppt2		Trappc5		Amdhd2		Hist2h2ac
Nudcd3		Cyp51a1						Rmdn1		Atp5b		Grpel2		Cd6
Cyth4		Uqcrc2						Arih2		Eif4a2		Idi2		Ndufs4
Lrrc8c		Cluh						Nr2c2		Anxa5		Ubash3b		Slc16a1
Hp1bp3		Znf414						Ctsl		Cers2		Cyfip1		Ndufa9
Nosip		Creld2						Eml3		Cnpy2		Mrpl23		Ndufa12
Rpl4		Txlng						Gpalpp1		Ccdc50		Anxa3		Imp3
Rpl31		Lnpep						Ttc23l		Atp1b3		Skap1		Micu2
Fabp5		Clp1						Surf2		Abcb7		Gcsh		Nup54
Cndp2		Cd5						Thyn1		Cd4		Smyd3		Ndufv2
Capn2		Coq3						Cd101		Cdk5rap3		Lad1		H2afy
Vav1		Man2a1						Sit1		Vmp1		Kiaa1524		Pdcd11
Arrb2		Nsmaf						Stom		Pgrmc2		Endod1		Msra
Plekhf1		Hps5						Anapc5		Qtrt1		Stat2		Map1lc3b
Rpl34		Uqcrfs1						Atp2b4		Uqcc1		Hdac4		Cmas
Sun2		Cbx5						Rab11fip2;Rab11fip1		Stoml2		Fbxo7		Psmg2
Pik3cd		Iap						Rpl7l1		Lancl1		Mavs		Clpx
Ostf1		Cd9						Zcchc11		Atp5o		Tmem30a		Gimap8
Gdi2		Timm23						Sfswap		Atp5c1		Suox		Psmg3
Glo1		Uimc1						Scpep1		Lman2		Stxbp3		Ndufs5
Cnot7		Cst3						Rbbp9		Zmpste24		Cytip		Utp3
Necap2		B2m						Mtss1		Agk		Pacsin2		Tor1aip1
Lsm14a		Ncln						Gigyf2		Fam131a		Lgals3		Csde1
Rpl15		Hsp90b1						Fgd3		Tmx3		Myo1c		Mif
Stat5a		Uqcrh						Fhod1		Yipf5		Vcl		Cd247
Hnrnpll		Ngly1						Wdr89		Elovl5		Ctdp1		Bax
Lypla2		Mapk11						Myd88		Ndufc2		Snx27		Emc10
Stat5b		Plac8						Fntb		Ppib		Vim		Parp9
Irf2bp2		Dnajb12						Lpxn		Trap1		Fam175b		S100a11
Erbb2ip		Slc38a1						Nfatc2		Pcca		Itpr3		Flot1
Me2		Coq7						Setd7		Manf		Dgkz		Cd3e
Hnrnpul1		Gusb						Pex19		Dld		Pik3r1		Mrpl27
Anp32a		Tomm22						Kin		Synj2bp		Gphn		Adk
Cotl1		Dnajb11						Nelfe		Itgb1		Inip		Hist1h1e
Fus		Helz2						Mt1		Rrm2		Hsdl2		Ndufb4
		Fam3a						Cradd		Rab3gap1		Nedd1		Ndufs2
		Erap1						Ahr		Atp6v0d1		Mtmr12		Was
		Alox5ap						Ikzf3		Tmed2		Bin1		Hist1h1b
		Scamp2						Atp6v0d2		Emc1		Tle3		Slc16a3
		Apmap						Pank4		Clk3		Traf6		Psat1
		Tmem87a						Rasa3		Atp13a1		Apoa1bp		Wipf1
		Manba						Ddx3y		Atp1a1		Dhx30		Pld3
		Il2rg						Ncbp2		Cnot11		Fam129a		Akt1s1
		M6pr						Qrich1		Ghitm		Acat2		Zc3h12d
		Itm2b						Cep97		Sec11a		Nhp2		S100a10
		Impad1						Ptms		Cds2		Cpt2		Ugdh
		Igf2r						Atp2b1		Gbas		Gtpbp1		Nol10
		Chd2						Ubp1		Dpm3		Srgap2		Sbno1
		Cd74						Psmb5		Mydgf		Foxp1		Uhrf1
		Gpr107						Cpox		Hspd1		Tubb6		Dock11
		Tnfrsf18						Alkbh5		Polr3c		Mri1		Limd2
		Top2a						Aes		Tmem14c		Prkar2a		Hist1h4a
		Minpp1						Elp2		Ndufb6		Rab27a		Acot2
		Ephx1						Cdkn2aip		Nab2		Lgals9		Tmsb4x
		Tfrc						Mak16		Trappc11		Tsta3		Themis
		Cox7b						Gpsm3		Ufc1		Gale		Itgal
		Ighm						Ndc1		Bcl11b		Fam45a		Nol11
		Dhx40						Urod		Swap70		Ikbkg		Ndufb8
		Bcl2l1						Rnaset2		Glud1		Clasp2		Akr1c13
		Fam213a						Rbpj		Yif1b		Foxk1		Diaph1
		Isg20						Casp6		Rpn1		Ak3		Ndufs1
		Enpp4						Ppp1r8		Timm17b		Znf706		Ociad1
		B4galnt1						Tcf7		Atp5h		Ptpn1		Lamp2
		Tspan14						Pold2		Degs1		Hibadh		Rrp12
		Chchd6						Ckb		Ddost		Impa2		Gins4
		Cd69						Smad2		Ctse		Prdx6		Aga
		Mtch1						Trpv2		Tm9sf3		Sp110		Naa40
		Hmgn2						Rexo2		Pdia6		Kif2c		Ptprc
		Thbs1						Lypla1		Leprotl1		Capns1		Chchd4
		Slc1a5						Ctsa		Kif11		Smarcd2		Cks1b
		Ctsg						Dis3l		Acaa2		Surf4		Trim25
		Cst7						Iqgap2		Ypel5		Max		Ddx58
		Plgrkt						Lyz2;Lyz1		Nde1;Ndel1		Npc1		Ftl1
		Glmp						Cdk5		Cox6c		Cpne3		Dtx3l
		Man1a1						Taf6		Ergic2		Asl		Dnajc9
		Itgb3						Rpl39		Stt3a		Inpp5d		Cd48
		Oas3						Birc6		Apool		Carkd		Bcl2
		Itgav						Stk24		Isyna1		Serbp1		Vti1b
		Letmd1						Pcyt2		Trappc12		Rps2		Plek
		H2-Q8						Csnk1a1		Vat1		Rps13		Paf
		Gzmb						Malt1		Spcs2		Slc25a1		Anxa2
								Junb		Phb2		Anxa4		Cdk6
								Pea15		Il27ra		Ugp2		Ndrg1
								Wibg		Prmt3		Rpl13a		Sub1
								Snap29		Ndufb10		Arl8b		Prpf39
								Ccnt1		Sidt2		Actr1b		Sars2
								Cyp11a1		Psmb9		Snrpa		Fth1
								Osgep		Tbce		Aco2		Cd3g
								Pacs1		Emc3		Mrps34		Ldhb
								Vwa5a		Cox6a1		Acap1		Inpp1
								Tpi1		Derl2		Rps5		Mad1l1
								Dctn3		Wdr6		Alg2		Slamf6
								Ccm2		Cox7c		Ppp3cb		Supt16h
								Ctsb		Mlec		Coro7		Txnrd2
								Eif2d		Atp5d		Hspa4l		Ndufs6
								Arf6		Tmem33		Ywhaz		Cr1l
								Adi1		Sptlc2		Gmppa		Pdlim1
								Map4k4		Calr		Bdh1		Ptprcap
								Banf1		Emc8		Rps24		Ranbp9
								Tpp1		Timm10		Ap2m1		Phf6
								Grcc10		Pdxdc1		Mpp1		Gimap4
								Rbm10		Hyou1		Myl12b		Ptpn18
								Plin3		Mtnd3		Prps1		Ythdc2
								Ubr5		Pdia3		Rel		Clec2d
								Dazap1		Atp5j2		Rgs3		Heatr3
								Larp7		Tmem109		Pura		Cth
								Crip1		Slc25a11		Agps		Abcb10
								Chtop		Dnajc3		Rps10		Rps7
								Lactb2		Emc2		Rps23		Fam107b
								Dpp9		Calu		Selh		Akr1d1
								Ppp1r18		Atp5j		Akr1a1		Cd28
								Mpp6		Fam3c		Syngr2		Dnajc5
								Rltpr		Sec61a1		Sh3bgrl		Gk
								Ppme1		Stx8		Lmnb2		Exosc4
								Pgp		Cox5a		Akr1b1		Ttn
								Pxn		Tmed10		Lcp1		Akr1c18
								Rpl14		Atp5l		Rab4b		Kbtbd11
								Mdp1		Smarcd1		Actbl2		Trafd1
								Dcaf8		Ssr4		Nt5c2		Creg1
								Gsto1		Gle1		Dnpep		Ggh
								Ptk2b		Ssr3		Psmc4		Cblb
								Apip		Vma21		Exoc2		Anapc2
								Trrap		Gng12		Prkd2		Rrp8
								Eps15		Nkiras2		Eps15l1		Gstt2
								Nol9		Mpdu1		Prkacb		Sepw1
								Ctbp1		Nceh1		Aldh18a1		Sike1
								Nudt2		Psmb10		Prkch		Evl
								Rps29		Nsmce2		Sec31a		Hist1h2bc
								Fam21		Ndufb5		Fdps		Pole
								Picalm		Dgcr8		Trip12		Cd84
								Adprh		Selk		Rab8b		Fam169b
								Sash3		Phb		Sar1b		Rpusd2
								Abi3		Tmed9		Rbm39		Trmt10a
								Eci2		Tap1		Tbca		Zmat2
								Xpnpep1		Golga7		Acads		Pin1
								Arhgap30		Mapkap1		Gna13		Ep400
								Nt5c3b		Lman1		Glyr1		Hist1h2ah
								Bag1		Erp29		Dhcr7		Zbp1
								Ube2o		Mrpl15		Apob		Casp1
								Pgm1		Nfkbib		Acadl		Ak4
								Fkbp15		Uggt1		Gstp1		Cdk5rap1
								Ctps2		Cd47		Nampt		Atm
								Nelfa		Canx		Nploc4		Vcpkmt
								Ilk		Sumf2		Fau		Cars2
								Son		Eea1		Surf6		Kat7
								Map4		Cept1		Uba6		Gbp1
								Wdr5		Ssbp1		Iqgap1		Ddt
								Pgam1		Emc7		Pycr2		S100a6
								Rps19		Slc25a3		Shoc2		Gbp2
								Nsf		Mesdc2		Hdac6		Stat4
								Wdr61		Esyt2		Ass1		Rpp14
								Dido1		Grpel1		Mov10		Gimap5
								Stk38		Atp5i		Ttc39b		Hmgn1
								Pfkl		Lmbrd1		Scaf8		Gpr183
								Denr		Rnf213		Srpk1		Pla2g12a
								Sart1		Atp5e		Rpl23		Icam2
								Dcun1d1		Atp6ap1		Dstn		Xdh
								Ripk1		Atp5f1		Slc9a3r1		Bsdc1
								Srrm2		Uqcr10		Uchl3		Pyhin1
								Eif4h		Krtcap2		Tspo		Znfx1
								Ppp6r3		Ormdl3		Rab18		Cactin
								Atpaf2		Ddrgk1		Mrps23		Itk
								Ptpn23		2015-09-01		Slc4a7		Cpm
								Rpl26		Gimap5;Gimap3		Thy1		Nrn1
								Rabep2		Armc8		Rps9		Lgals7
								Dffa		Gpd2		Rpl18a		Abcb1b
								Akt2		Arl6ip1		Opa1		Kiaa1598
								Nup107		Minos1		Cyb5a		Vav3
								Zcchc8		Pex11b				Coasy
								Akap8		Ipcef1				Adck5
								Srsf10		Inppl1				Slc2a3
								Pcnp		Pdia4				Tab1
								Chmp5		Txndc5				Dapl1
								Eml4		Atp9b				Stau1
								Tradd		Vps41				Sell
								Rbm3		Rtn3				Lag3
								Hmgb3		Vps13c				Itih2
								Lyar		Ergic1				Gzma
								Rpl17		Hexa				Penk
								Ythdf3		Mtx1				Pros1
								Eif4g3		Galnt2				Pole3
								Rad50		Yme1l1				Myh10
								Rpl29		Hspa5				Spp2
								Srsf1		Cyc1
								Rsl1d1		Diexf
								Ppp2r4		Rtn4
								Parp1		Brat1
								Mob4		Pigs
								Stx4		Pccb
								Ccar1		Sdf2l1
								Rpl36a		Tap2
								Tfip11		Cox4i1
								Fam49b		Ndufb2
								Cnn2		Ostc
								Ldha		Pigk
								Galk2		Usp16
								Lgals1		Nomo1
								Ciapin1		Atp6v0a2
								Aip		Anxa6
								Helb		Cd44
								Ptma		Cyb5b
								Sema4d		Kiaa2013
								Zc3h11a		Xpnpep3
								Edc4		Atp6ap2
								Snx12		Gpx4
								Exosc3		Mnat1
								Nutf2		Arap2
								Anp32e		Rmdn3
								N6amt2		Vkorc1
								Grhpr		Sec61g
								Pgls		Lipa
								Nup50		Tm9sf1
								Adprhl2		Sik3
								Uchl3;Uchl4		Rbm19
								Zyx		Fundc2
								Acin1		Tmem43
								Vac14		Timm22
								Lrrfip1		Dicer1
								Rad21		Clptm1l
								Tma7		Nt5c3a
								Chmp4b		Tm9sf4
								Wdr12		Tmco1
								Safb		Acad10
								Fyb		Tomm40
								Acyp1		Nudt18
								Xrcc1		Gstk1
								Acadm		Jtb
								Fkbp1a		Cdk2ap1;Cdk2ap2
								Myef2		Ccnh
								Rps15		Icam1
								Pebp1		Erp44
								Acot13		Cc2d2a
								Nup210		Mars2
								Hcls1		Tapbpl
								Frg1		Hsd17b12
								Tuba1a;Tuba3a		Lactb
								Stk10		Pon2
								Fip1l1		Tm9sf2
								Hexim1		Mtfr1l
								Ubqln2		Mccc2
								Hnrnpm		Tmed5
								Rfk		Poglut1
								Ppia		Tfam
								Cbr1		Lrpap1
								Txndc17		H2-K1
								Rpl8		Cep152
								Snx2		Uqcrb
								Nit2		Chuk
								Khsrp		Mfsd1
								Ap1g1		Hacd2
								Stat3		Camk1d
								Wbp11		H2-D1;H2-L
								Nup160		Cers5
								Srsf5		Alb
								Nup98		Pam16
								Plp2		Hemgn
								Pml		Slamf1
								Pfkp		Slc25a17
								Chm		Clptm1
								Rbmxl1		Ormdl2;Ormdl1
								Msh6		Uvrag
								Pycard		Micu1
								Rbm14		Ilvbl
								Snx6		Slc12a7
								Rsu1		Magt1
								Rnaseh2a		Pacsin1
								Crkl		Syne2
								Asrgl1		Vkorc1l1
								Toe1		Smdt1
								Clic1		Yipf4
								Hnrnpa0		Stam2
								Smpd4		H2-T23
								Fhl3		S100a9
								Ddx47		Diaph3
								Mcm5		Qki
								Prkag1		Klhl22
								Nup155		Slc4a8
										Ndufb11
										Vps53
										Mtr
										Tor1a
										Tapbp
										Tmem165
										Jak1
										Hspbp1
										Ecd
										Fam133b
										Slc7a5
										Sema4a
										Kif23
										Stard3
										Mfge8
										Ubtf
										H6pd
										Lmtk3
										Marcks
										Panx1
										Nedd4
										Pecam1
										Mtco1
										Pgrmc1
										Keap1
										Tor3a
										F13a1
										Fam134c
										Ccdc134
										Tor1b
										Vwa9
										Fhad1
										Ttc27
										Ampd3
										Ccdc93
										Irgm1
										Ccs
										Cd82
										Med21
										Cd200
										Ccdc47
										Parl
										Cd97
										Ric8a
										Galnt7
										Snx9
										Colgalt1
										Cdc123
										Fdft1
										Ept1
										Slfn5
										Sptlc1
										Stx6
										Bcap29
										Pla2g16
										Fundc1
										Rcsd1
										Itm2c
										Romo1
										Rasgrp2
										Pik3c3
										Tgfb1
										Hspa13
										Hmga1
										Sqstm1
										Ubac1
										Atl2
										Sil1
										Galnt1
										Ifih1
										Rcn1
										Slc7a1
										Exog
										Mpo
										Anxa1
										Rilpl2
										Tmem70
										Timm17a
										Spry1
										Git1
										Tax1bp1
										Fam96a
										Cd81
										Bcs1l
										Abcb1b;Abcb1a
										Mthfd2
										Spcs1
										Stap1
										Ermp1
										Dock10
										Slc38a10
										Itm2a
										Hist1h2ah;H2afj;Hist1h2ak;Hist1h2af;Hist3h2a;Hist1h2ab
										Cyp2s1
										Ifit1
										Tmem261
										Pf4
										Tnfrsf4
										Myo18a
										Gde1
										Tmem62
										B3GNT2
										Prkca
										Slc39a7
										Ccdc90b
										Ccnb1
										Hsd17b11
										Samsn1
										Xaf1
										Dguok
										Alcam
										Slc25a32
										Sqle
										Fgg
										Dnajc15
										Igj
										Pde4dip
										Nagpa
										Il4r
										Isg15
										Cd274
										Iigp1
										Rgn
										Scin

## Sheet: S3d.Fig
Pathways whose core enrichment genes overlap with Oxidative phosphorylation		Fatty acid metabolism		Alcoholism/Systemic lupus erythematosus		Ribosome		AAGM		Aminoacyl-tRNA
Ndufb9		Acaa2		Hist1h4d		Rps6		Ass1		Gars
Cox6c		Acat2		Hist1h4c		LOC105244208		Adssl1		Aars
Cox6b1		Acsl5		Hist1h4b		Mrps6		Cad		Cars
COX2		Acadsb		Hist1h4a		Rpl22l1		Asns		Vars
Ndufs8		Acads		Hist2h4		Rpl19		Glud1		Mars
Uqcrc1		Hadh		Hist1h4h		Mrps17		Adss		Wars
Ndufa4		Cpt2		Hist1h4j		Mrpl21		Adsl		Lars
Uqcrc2		Hacd3		Hist1h4k		Rps27rt		Got1		Nars
Ndufb4		Cpt1a		Hist1h4m		Rps27				Iars
Gm3244		Echs1		Hist1h4n		Rps16				Tars
Gm3873		Elovl5		Hist1h4i		Rps25				Iars2
Ndufb6		Acaca		Hist4h4		Rpl36al
Ndufs3		Tecr		Hist1h4f		Rpl36a
Ndufs5		Oxsm		Cd28		Rps19
Ndufc2		Mecr		H2afy		Rps15a
Ndufa2		Fasn		Gng5		Rpl28
Tgm2		Acadvl		Gng5-ps		Rpl5
Ndufv2		Mcat				Rpl27a
Ndufa9		Aldh2				Rpl35a
Uqcrq		Gcdh				Rpl13
Ndufs2		Eci1				Rps28
Ndufa6						Mrpl16
Ndufb7						Rpl18
Ndufa10						Rpl6
Ndufa5						Rpl9
Ndufa13						Rpl13a
Ndufv1						Rpl14
Ndufa12						Rpl4
Ndufs1						Rpl38
Uqcr10						Rps21
Cox7a2						Rps18
Cox7a2l						Rps3a1
Uqcr11						Rps10
Uqcrfs1						Rpl12
Map3k5						Rps26
Ndufa7						Rpl26
Akt2						Rpl30
Mapk11						Rpl23
Gnai3						LOC100044627
Gng5						LOC100862455
Gng5-ps						Rps4x
Uba1						Rpl8
						Rps20
						Rpl32
						Rpl29
						Gm8210
						Rpl23a
						Rplp2
						Rps9
						Rpl11
						Rps3
						Rplp0
						Rpl7
						Rpl34
						Rpl34-ps1
						Gm4705
						Rpl18a
						Mrpl2
